1 Unique genetic signatures of local adaptation over space and time for  
2 diapause, an ecologically relevant complex trait, in *Drosophila*  
3 *melanogaster*

4  
5 Short title: Diapause genetics in *D. melanogaster*

6  
7 Priscilla A. Erickson<sup>1\*</sup>, Cory A. Weller<sup>1</sup>, Daniel Y. Song<sup>1</sup>, Alyssa S. Bangerter<sup>1</sup>, Paul  
8 Schmidt<sup>2</sup>, & Alan O. Bergland<sup>1</sup>

9  
10 <sup>1</sup>Department of Biology; University of Virginia, Charlottesville, VA, 22904

11 <sup>2</sup>Department of Biology; University of Pennsylvania, Philadelphia, PA, 19104

12  
13 \*Corresponding author: [pae3g@virginia.edu](mailto:pae3g@virginia.edu)

14 ORCID: 0000-0001-8420-995X

15  
16 Keywords: seasonal evolution; GWAS; polygenic trait; photoperiodism; hybrid swarm;  
17 ovarian dormancy; clinal evolution

18

## 19 **Abstract**

20

21 Organisms living in seasonally variable environments utilize cues such as light and  
22 temperature to induce plastic responses, enabling them to exploit favorable seasons  
23 and avoid unfavorable ones. Local adaptation can result in variation in seasonal  
24 responses, but the genetic basis and evolutionary history of this variation remains  
25 elusive. Many insects, including *Drosophila melanogaster*, are able to undergo an arrest  
26 of reproductive development (diapause) in response to unfavorable conditions. In *D.*  
27 *melanogaster*, the ability to diapause is more common in high latitude populations,  
28 where flies endure harsher winters, and in the spring, reflecting differential survivorship  
29 of overwintering populations. Using a novel hybrid swarm-based genome wide  
30 association study, we examined the genetic basis and evolutionary history of ovarian  
31 diapause. We exposed outbred females to different temperatures and day lengths,  
32 characterized ovarian development for over 2800 flies, and reconstructed their  
33 complete, phased genomes. We found that diapause, scored at two different  
34 developmental cutoffs, has modest heritability, and we identified hundreds of SNPs  
35 associated with each of the two phenotypes. Alleles associated with one of the  
36 diapause phenotypes tend to be more common at higher latitudes, but these alleles do  
37 not show predictable seasonal variation. The collective signal of many small-effect,  
38 clinally varying SNPs can plausibly explain latitudinal variation in diapause seen in  
39 North America. Alleles associated with diapause are segregating at relatively high  
40 frequencies in Zambia, suggesting that variation in diapause relies on ancestral  
41 polymorphisms, and both pro- and anti-diapause alleles have experienced selection in  
42 North America. Finally, we utilized outdoor mesocosms to track diapause under natural  
43 conditions. We found that hybrid swarms reared outdoors evolved increased propensity  
44 for diapause in late fall, whereas indoor control populations experienced no such  
45 change. Our results indicate that diapause is a complex, quantitative trait with different  
46 evolutionary patterns across time and space.

47

## 48 **Author Summary**

49

50 Animals exhibit diverse strategies to cope with unfavorable conditions in temperate,  
51 seasonally varying environments. The model fly, *Drosophila melanogaster*, can enter a  
52 physiological state known as diapause under winter-like conditions. Diapause is  
53 characterized by an absence of egg maturation in females and is thought to conserve  
54 energy for survival during stressful times. The ability to diapause is more common in  
55 flies from higher latitudes and in offspring from flies that have recently overwintered.  
56 Therefore, diapause has been thought to be a recent adaptation to temperate climates.  
57 We identified hundreds of genetic variants that affect diapause and found that some  
58 vary predictably across latitudes in North America. We found little signal of repeated

59 seasonality in diapause-associated genetic variants, but our populations evolved an  
60 increased ability to diapause in the winter when they were exposed to natural  
61 conditions. Combined, our results suggest that diapause-associated variants evolve  
62 differently across space and time. We find little evidence that diapause evolved recently  
63 in temperate environments; rather, SNPs associated with diapause tend to be quite  
64 common in Zambia, suggesting that diapause may promote survival under stresses  
65 other than cold. Our results provide future targets for research into the genetic  
66 underpinnings of this complex, ecologically relevant trait.

67

## 68 **Introduction**

69

70 Organisms exhibit diverse strategies to survive environments that vary in space and  
71 time. Populations can undergo local adaptation, producing genotypic combinations that  
72 optimize fitness under present environmental conditions but may be less fit in other  
73 environments [1]. In temperate, seasonal locales, environmental signals are often used  
74 to anticipate the onset of the unfavorable season and induce plastic responses [2–4].  
75 Insects exhibit a spectacular array of plastic responses to changes in season that can  
76 affect morphology [5–7], behavior [8], and developmental progression [9–11]. The ability  
77 to reprogram or arrest development, potentially for a fixed period of time (*diapause*),  
78 allows insects to weather unfavorable conditions in a hardy state of low metabolism [9–  
79 13]. Entry into diapause can result in tradeoffs between immediate survival and future  
80 growth, longevity, and reproductive success [14–16]. Due to these tradeoffs, some  
81 species exhibit local adaptation of their diapause response, producing dramatic  
82 differences in life history patterns across space and time [17–22]. Therefore, diapause  
83 is a plastic response to environmental changes, but the genetic ability to diapause can  
84 also differ across environments as a result of local adaptation. Intraspecific differences  
85 in diapause strategies offer an opportunity to study the spatiotemporal variation and  
86 evolutionary history of alleles contributing to a critical life history trait.

87 A number of reproductive life history traits vary in the genetic model organism  
88 *Drosophila melanogaster* [18,23]. Female *D. melanogaster* are capable of arresting  
89 reproductive development and oogenesis when exposed to short day lengths (10 hours  
90 light: 14 hours dark, or 10L:14D) and low temperatures (10–14°C) soon after eclosion  
91 [24]. These winter-like conditions induce a change in hormonal signaling that prevents  
92 reproductive development [25,26]. Physiologically, dormancy is regulated by hormones  
93 including insulin [27–29], juvenile hormone [25,30,31], and ecdysteroids [30,32], as well  
94 as dopamine and serotonin [33]. *D. melanogaster*'s ovarian dormancy is accompanied  
95 by metabolic changes [34,35] and is enhanced by starvation conditions [36]. Dormancy  
96 is coincident with transcriptional changes in up to half of all genes in *D. melanogaster*  
97 [37–39] and in other drosophilid species [40–42]. Male *D. melanogaster* also arrest  
98 spermatogenesis and undergo physiological changes under unfavorable conditions [43].

99 Dormancy subsequently diverts limited energy to survival rather than to reproduction at  
100 the onset of winter, perhaps allowing flies to overwinter *in situ* [44,45] or in local refugia  
101 [46]. Whether this dormancy state is a true diapause or a state of quiescence is still  
102 open to debate [11], however it is clearly a substantial physiological reprogramming of  
103 the normal female egg production program that phenocopies diapause strategies of  
104 temperate endemic drosophilids [47–51]. Hereafter, we refer to *D. melanogaster*'s  
105 ovarian dormancy as diapause, keeping with established terminology in the field [for  
106 example, 18,24,26,46].

107 Clinal variation in the severity of winter is correlated with clinal variation in the ability  
108 to enter diapause in *D. melanogaster*. Flies from northern locations in North America,  
109 such as Maine, are more likely to be capable of entering diapause than those from more  
110 southern locations, such as Florida [18]. Additionally, the ability to enter diapause varies  
111 seasonally: the offspring of flies captured in the early spring (the survivors of winter, or  
112 their direct descendants) have a greater propensity for diapause than the offspring of  
113 flies captured in late summer [19], the descendants of lineages that prospered during  
114 favorable conditions [53]. Whether the same genetic loci underlie similar spatial and  
115 temporal evolution of phenotypes such as diapause remains unknown at a genome-  
116 wide level (but see [54]).

117 Adaptive evolutionary change in diapause propensity over ~15 generations [55]  
118 during the growing season suggests the existence of tradeoffs related to diapause;  
119 while diapause is advantageous in unfavorable conditions, fitness costs occur when  
120 diapause is unnecessary [12]. In the absence of diapause-inducing conditions, strains  
121 capable of diapause have lower early reproductive success, putting them at a  
122 disadvantage when conditions are ideal for rapid reproduction. However, strains able to  
123 diapause tend to live longer, have greater reproductive success later in life, and are  
124 more tolerant of cold and starvation [15]. Laboratory selection experiments offer further  
125 evidence for tradeoffs: outbred flies reared under alternating cold and starvation stress  
126 in the lab evolve an increased genetic propensity to diapause, whereas flies reared  
127 under benign lab conditions evolve a decreased propensity for diapause [19], as do flies  
128 experimentally selected for heat tolerance [56]. Taken together, these findings suggest  
129 diapause is an ecologically relevant trait with tradeoffs that underlie local adaptation  
130 across both space and time.

131 In addition to being genetically polymorphic, *D. melanogaster*'s diapause is shallow  
132 relative to the diapause of other insects, including other drosophilids [57,58]. Females  
133 may spontaneously resume ovarian development after ~6 weeks even when diapause-  
134 inducing conditions persist [24] (but see [59]), and diapause is rapidly broken if  
135 temperature or day length is increased [24]. In a short-lived species with many  
136 generations per year, this weak and facultative diapause strategy may be advantageous  
137 to allow individuals to quickly reenter reproductive mode soon after conditions become  
138 favorable. On the other hand, the relatively recent colonization of temperate habitats

139 [53-57] led to the suggestion that seasonal diapause may be a recently evolved trait  
140 [24,60], so the weak diapause of *D. melanogaster* might reflect its incipient evolution.  
141 Phenotypic plasticity, such as diapause or behavioral modification, is predicted to  
142 evolve when the environment varies more rapidly than generation time, whereas fixed  
143 alternative strategies are favored when environmental variation occurs more slowly than  
144 generation time [61]. However, in temperate *D. melanogaster*, the scale of temporal  
145 environmental variation is similar to generation time (weeks), which may explain the  
146 reversibility of diapause and the substantial genetic variation in diapause induction over  
147 seasonal timescales.

148 Despite our extensive knowledge of the natural history and physiological basis of  
149 diapause in *D. melanogaster* and other insects, we still know little about the identity and  
150 evolutionary history of polymorphisms underlying variation in this critical life history trait  
151 [62]. Herein, we sought to identify genetic variants underlying diapause via a genome  
152 wide association study (GWAS) and to link these variants to patterns of global  
153 polymorphism in *D. melanogaster*. After identifying hundreds of single nucleotide  
154 polymorphisms (SNPs) with small effects on diapause, we specifically addressed two  
155 questions about the evolutionary history of these alleles. First, do SNPs underlying  
156 diapause show predictable patterns of genetic variation across latitudes and seasons,  
157 with pro-diapause alleles more common in northern latitudes and in the spring? Second,  
158 are alleles associated with diapause present in ancestral populations, and have they  
159 experienced recent selective sweeps in North America? Our results suggest that the  
160 evolution of diapause across spatial gradients may be distinct from its evolution across  
161 seasons: while diapause-associated alleles are weakly clinal, they do not tend to vary  
162 predictably over seasons across multiple populations. Furthermore, alleles controlling  
163 diapause represent ancestral genetic variation, suggesting they may play roles in  
164 seasonal, or even general, aspects of stress response in ancestral localities. The  
165 favorability of diapause-associated alleles under a variety of stressful conditions could  
166 explain the lack of repeated seasonality of these alleles as well as their presence in  
167 tropical climates with pronounced seasonality. Our results provide a roadmap to  
168 understand the role of small-effect alleles underlying the evolution of a complex,  
169 ecologically relevant trait that varies across space and time.

170

## 171 **Results:**

172

173 In order to characterize the genetic polymorphisms that underlie variation in  
174 diapause in *D. melanogaster*, we used a novel hybrid-swarm based mapping approach  
175 [63] employing sequenced, genetically diverse inbred lines collected around North  
176 America and the Caribbean (Fig 1A; S1 Fig; S1 Table). We intercrossed these lines to  
177 produce two outbred populations with recombinant genotypes (populations A and B, Fig  
178 1B; S2 Fig) and then exposed these hybrid individuals to various diapause-inducing

179 conditions in custom-built chambers (Fig 1C). We mapped the genetic basis of diapause  
180 by dissecting and genotyping 2,823 females (Fig 1D). We used the results of this  
181 GWAS to analyze patterns of variation in SNPs associated with diapause.  
182

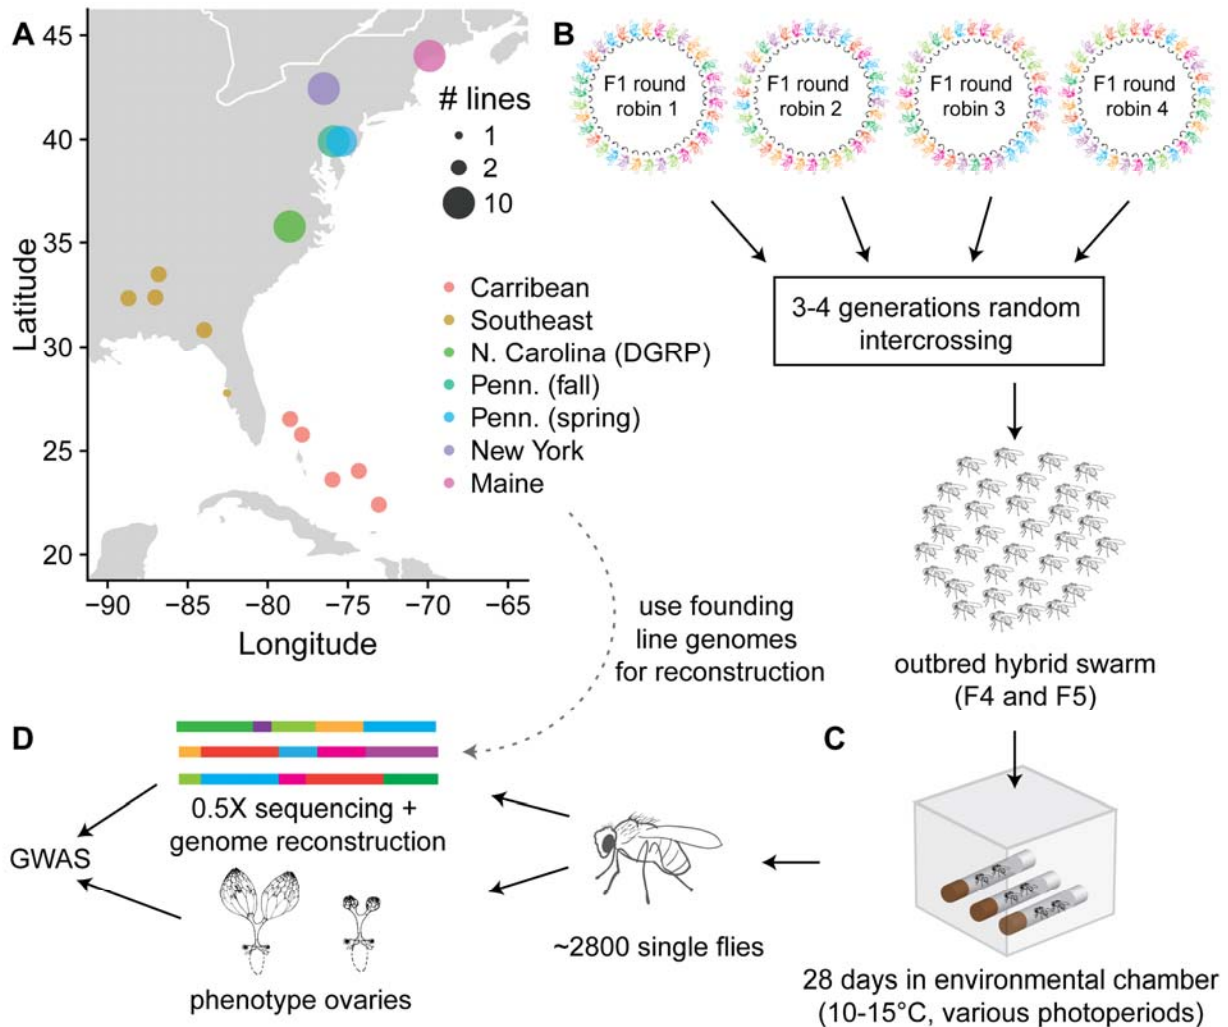

183  
184 **Fig 1. Experimental design for hybrid-swarm based association mapping of**  
185 **diapause.** (A) A total of 68 sequenced, inbred lines from seven North American  
186 collections were used to initiate hybrid swarm crosses. The lines were divided into two  
187 groups of 34 (populations A and B) so that each group had equal representation from  
188 each collection. Map generated using [64]. (B) Within each population, randomly  
189 ordered round-robin crosses were established. The F1 adults were released into cages  
190 and propagated with non-overlapping generations. (C) Virgin females from the F4 and  
191 F5 generations were collected and placed in environmental chambers with varying  
192 photoperiods and temperatures for 28 days. (D) Individual flies were dissected to  
193 phenotype diapause. DNA was extracted from the carcasses and individually  
194 sequenced to approximately 0.5X coverage. Sequencing reads were used to

195 reconstruct full genome sequences and perform a genome-wide association study.  
196 Ovary drawing in D) modified from [65] under a CC-BY license.

197

### 198 **Temperature and nutrition affect diapause**

199 We initially assessed ovarian development in F4 and F5 hybrid swarm individuals  
200 exposed to a range of cool temperatures (10-16 °C, S3 Fig) and photoperiods  
201 representing the approximate range of day lengths experienced by our northernmost  
202 Maine population. We recorded the stage of the most advanced non-stage 14 ovariole  
203 [66] (Fig 2A) and counted the number of mature eggs in each individual. We found a  
204 strong effect of temperature on ovarian development: higher temperatures led to more  
205 advanced ovarian development and more eggs (Fig 2A-B). When examining the most  
206 advanced pre-stage 14 ovariole in flies that had produced eggs, we also found that  
207 higher temperatures increased the proportion of individuals with advanced ovariole  
208 stages (Fig 2C).

209 We initially scored diapause as an absence of development past three different  
210 ovariole stages [66]: stage 8 (no ovarioles past stage 7), stage 10 (no ovarioles past  
211 stage 9), and stage 14 (no mature eggs present) (Fig 2A). Diapause at stage 8 and  
212 stage 10 were modestly correlated (Pearson correlation,  $R = 0.49$ ,  $P = 2 \times 10^{-172}$ ) and  
213 diapause at stage 10 and stage 14 were strongly correlated ( $R = 0.92$ ,  $P < 1 \times 10^{-200}$ ).  
214 After accounting for differences caused by temperature, photoperiod had an effect on  
215 diapause in the opposite direction predicted: individuals exposed to long day (13L:11D  
216 or 15L:9D) light cycles tended to have higher diapause induction (Fig 2D-F), regardless  
217 of the ovariole stage cutoff used to determine diapause. Based on recent studies [35],  
218 previous work [18,19,52,59,67], and developmental evidence that a checkpoint exists  
219 between stages 9 and 10 in ovariole development [68–70], we chose to classify  
220 diapause either as an absence of ovariole development to stage 8 (Fig 2D) or stage 10  
221 (Fig 2E) for the remaining genetic analysis.

222

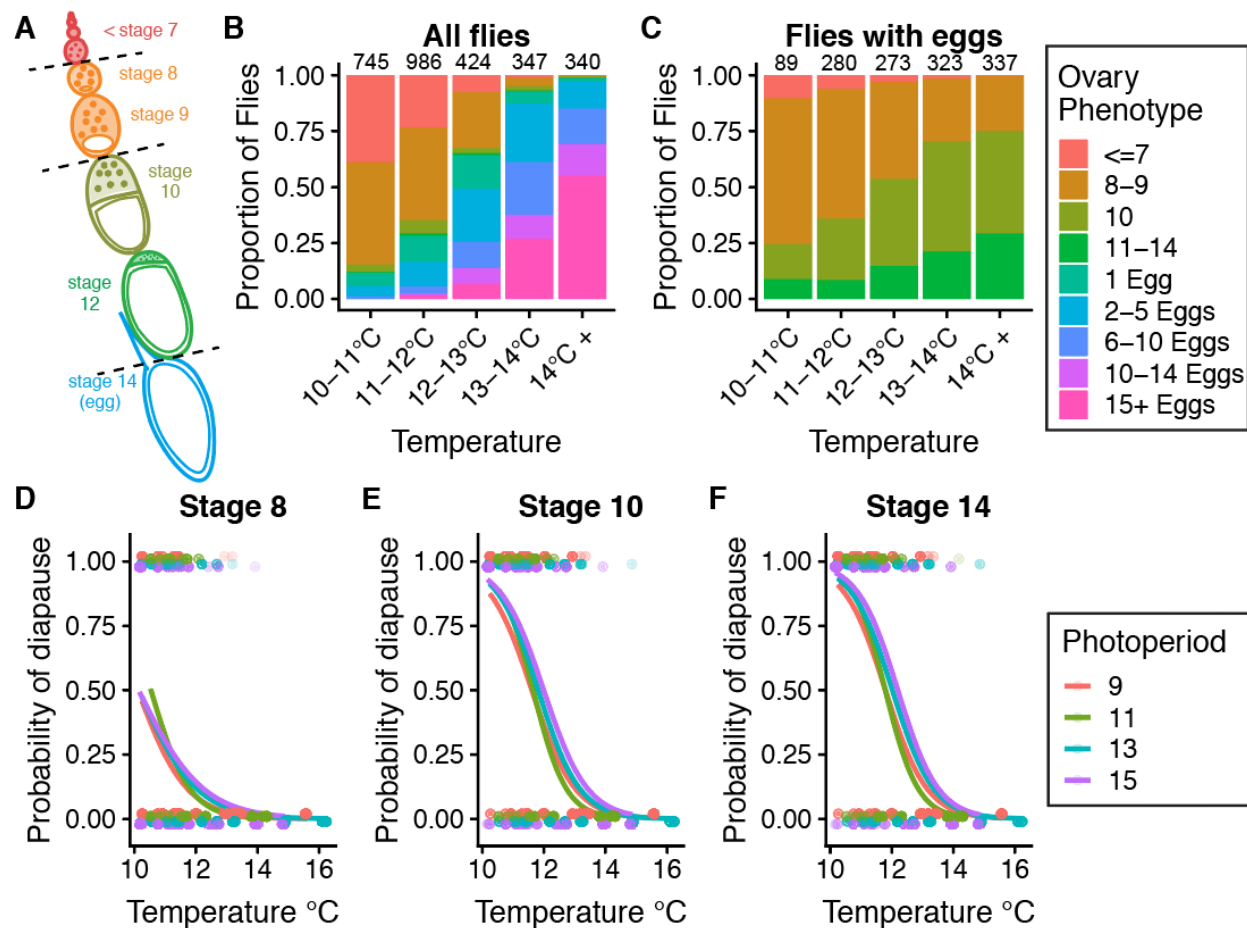

223  
224

225 **Fig 2. Effects of temperature and photoperiod on diapause in hybrid swarm**  
 226 **populations.** (A) Ovaries were scored based on the most advanced ovariole stage and  
 227 the total number of eggs, according to King (1970) [66]. Dashed lines indicate three  
 228 cutoffs for scoring diapause: stage 8, stage 10, and stage 14. Colors correspond to  
 229 panels B and C. (B) The most advanced ovariole stage, proportion of flies with eggs,  
 230 and the total number of eggs per individual all increase with increasing temperature.  
 231 Numbers above bars indicate the total number of flies phenotyped in each temperature  
 232 range. (C) Among flies with eggs, the stage of the most advanced egg chamber also  
 233 increases with temperature. (D-F) Diapause incidence, scored at the stage 8, stage 10,  
 234 or stage 14 cutoffs, decreases with increasing temperature (binomial general linear  
 235 model,  $P < 2 \times 10^{-16}$  for all phenotypes). Unexpectedly, longer photoperiods (shown as  
 236 hours of light: hours of dark) result in increased diapause incidence (binomial *glm*,  $P =$   
 237  $0.002$ ,  $P = 2.7 \times 10^{-7}$ ,  $P = 5.0 \times 10^{-8}$ , respectively). Gray points represent individual fly  
 238 phenotypes (diapause = 1, non-diapause = 0).

239  
240  
241

We next investigated other factors besides temperature and photoperiod that may affect diapause. The F4 generation of our outbred populations had increased diapause



242 incidence at all temperatures (S4A Fig;  $P < 2 \times 10^{-16}$ ) relative to generation F5,  
243 potentially reflecting inadvertent rearing differences (such as larval density) between  
244 generations. Outbred populations A and B also showed significantly different diapause  
245 induction across temperatures (S4B Fig,  $P < 0.01$ ), though the differences were much  
246 less pronounced than the effect of generation. In an experiment conducted in the F20  
247 generation of the hybrid swarm, we found that feeding adults supplemental live yeast  
248 substantially reduced diapause incidence across a range of temperatures, further  
249 suggesting that adult nutrition and temperature contribute to diapause induction (S5 Fig,  
250  $P < 1 \times 10^{-10}$ ).

251 Lastly, we tested for an influence of *Wolbachia* infection on diapause. We quantified  
252 the proportion of sequencing reads mapping to the *Wolbachia* genome for each hybrid  
253 individual to infer *Wolbachia* infection status. We found that *Wolbachia* decreased the  
254 likelihood of diapause at stage 8 (diapause was observed in 17% of *Wolbachia*-infected  
255 individuals vs 23% of uninfected individuals; Fisher's exact test;  $P = 0.0001$ ) but did not  
256 influence diapause at stage 10 ( $P = 0.31$ ). Placing all of these variables into a single  
257 model revealed that temperature and generation accounted for the majority of  
258 explainable variation in the diapause phenotype, though more than 50% of the variation  
259 remains unexplained (S2 Table).

260

### 261 **Diapause is heritable with a polygenic signal**

262 We estimated a narrow-sense heritability of diapause using genome-wide genotypes  
263 in a restricted maximum likelihood analysis in GCTA [71,72]. We estimated heritabilities  
264 of approximately 0.12 and 0.08 for stage 8 and 10 diapause, respectively, using all  
265 genotype data from both populations combined. These estimates far exceeded the  
266 heritability calculated for 1,000 permuted phenotype datasets (Fig 3A; B). To  
267 characterize the genetic architecture of natural variation in diapause, we performed a  
268 GWAS using reconstructed genotypes (S6 Fig), from 2,823 hybrid individuals for  
269 diapause scored at two cutoffs. We performed this analysis, using 100 different  
270 imputations of missing genotype data, in populations A and B separately, as well as the  
271 two populations combined ("both"). We also generated 1000 permutations of the  
272 combined dataset and 100 permutations of each individual population. We then  
273 calculated the genomic inflation factor,  $\lambda_{GC}$ , for the mapping results of each phenotype  
274 in each permutation. For all three mapping populations,  $\lambda_{GC}$  was slightly greater than 1,  
275 whereas the permutations ranged from  $\sim 0.8$  to  $\sim 1.1$  (Fig 3C). The slight inflation of  $\lambda_{GC}$   
276 is indicative of the polygenic basis of diapause and was variable across chromosomes  
277 (S7 Fig). Visual inspection of a representative Manhattan plot also revealed a broadly  
278 polygenic signal of diapause, with SNPs scattered throughout the genome (Fig 3D). We  
279 note relatively few alleles associated with diapause on the X chromosome, which  
280 appears to be specifically caused by a lack of associations in population B (S7 Fig).

281 Surprisingly, X is the only chromosome that appears to be more diverse in population B  
 282 relative to A (S2 Fig).  
 283

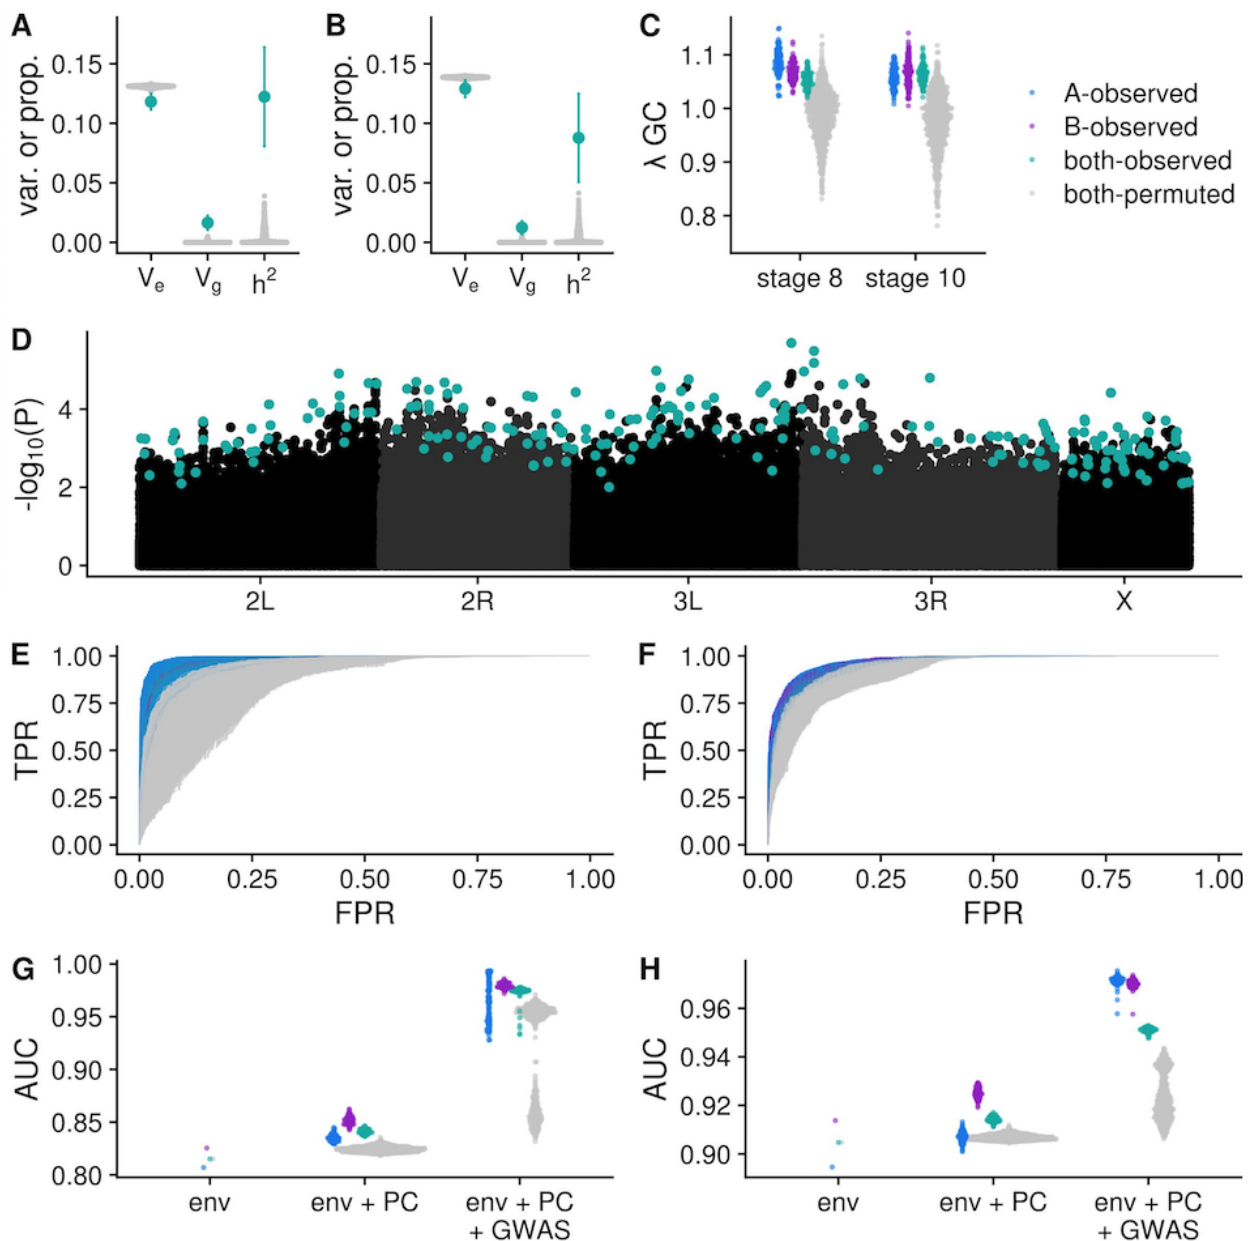

284  
 285

286 **Fig 3. Diapause is a polygenic trait.** (A-B)  $V_g$ ,  $V_e$  and heritability estimates for stage 8  
 287 (A) and stage 10 (B) diapause phenotypes. Teal points indicate observed estimates +/-  
 288 95% confidence interval for heritability in the hybrid swarm (populations A and B  
 289 combined). Grey points indicate heritability estimates for 1000 permutations. (C)  
 290 Genomic inflation factor (also known as  $\lambda_{GC}$ ) for GWAS in 100 imputations of actual  
 291 data (teal=A+B, blue=A, purple=B) and 1000 permutations of A+B (grey). (D) Manhattan  
 292 plot for GENESIS  $P$ -values for stage 10 diapause in one imputation. Teal points indicate  
 293 LASSO SNPs. (E-F) Receiver operating characteristic (ROC) curves for stage 8 (E) and

294 stage 10 (F) diapause predictions made using LASSO SNPs. Phenotypes for each  
295 individual in the mapping population were predicted using the informative environmental  
296 variables, genetic principal components, and SNPs chosen by LASSO. At any given  
297 false positive rate (FPR), the observed data (blue, purple, and teal lines) have higher  
298 true positive rates (TPR) relative to permuted GWAS (gray lines). (G-H) Quantification  
299 of ROC analysis using area under the curve metric (AUC). “env” is a model containing  
300 only environmental data; “env + PC” includes environmental data and 32 principal  
301 components; “env + PC + GWAS” includes the former plus the genotypes of up to  
302 several hundred SNPs chosen by LASSO.

303  
304 Following the GWAS, we used LASSO [73] to identify a subset of unlinked,  
305 informative SNPs (hereafter, “LASSO SNPs”) from the top 10,000 SNPs ranked by *P*-  
306 value (Fig 3D). LASSO takes a number of potential predictor variables and chooses  
307 those that are most informative yet independent [74]. Each LASSO model started with  
308 environmental covariates, the top 32 principal components derived from genome-wide  
309 SNPs, and the SNP genotypes; the resulting model usually retained several hundred  
310 SNPs. LASSO SNPs (S6 Table) showed low levels of LD (S8 Fig), suggesting the  
311 algorithm was successful in choosing unlinked informative markers. More LASSO SNPs  
312 were identified in the observed data relative to permutations (S9 Fig), demonstrating  
313 increased genetic signal in the true ordering of the data. However, we note that LASSO  
314 SNPs may be markers of important haplotypes and not causative loci.

315 To determine whether the SNPs identified by LASSO were in fact informative for  
316 predicting diapause phenotypes, we implemented a receiver operating characteristic  
317 curve (ROC) analysis [75]. The SNPs chosen by LASSO substantially improved the  
318 accuracy of the predicted phenotypes, with a higher true positive rate (TPR) and lower  
319 false positive rate (FPR) in the observed data relative to the permutations (Fig 3E; F,  
320 compare blue/green/purple lines to grey). This difference can be quantified using the  
321 area under the curve (AUC), which was higher for predictions in the observed data  
322 relative to the permutations for both phenotypes (Fig 3G; H). Additionally, we found that  
323 for both phenotypes, adding genetic principal components to the model improved the  
324 model relative to environment alone, and adding LASSO SNPs further improved the  
325 model over principal components plus environment (Fig 3G; H). This improvement was  
326 greater in the actual data relative to the permutations; combined, these observations  
327 suggest true genetic signal in the observed data.

328 We tested for shared genetic signal for diapause between the two mapping  
329 populations by counting the number of SNPs shared between populations A and B for  
330 each imputation and permutation of the data. We found that the number of shared  
331 LASSO SNPs or quantile-ranked SNPs was very small, and the overlap between SNPs  
332 identified from actual data did not exceed the overlap between SNPs identified in  
333 permutations (S10A Fig). However, we did observe an excess of shared SNPs  
334 associated with both of the two phenotypes. We found that for the quantile-ranked  
335 cutoffs, the number of SNPs shared in the observed data was generally greater than the

336 number of SNPs shared between permutations (S10B Fig). This observation suggests  
337 that some loci affect diapause at both stages. In contrast, we observed little overlap of  
338 LASSO SNPs between the two phenotypes, again indicating that LASSO SNPs may be  
339 markers and not causative.

340 Intriguingly, we found no effect of two previously described variants (*cpo* SNP: *dm3*  
341 chr3R: 13,793,588; and *timeless* indel: chr2L.: 3,504,474) [52,54,60,76] on diapause  
342 (S11 Fig). We tested for association between diapause and karyotype at five  
343 cosmopolitan inversions [In(2L)Ns, In(2R)t, In(3R)Payne, In(3R)C, and In(3R)Mo]  
344 segregating in the hybrid swarm. We found that individuals heterozygous for  
345 In(3R)Payne had a modest decrease in diapause induction at both stages in population  
346 A and both populations combined (S3 Table); however, these effects were not  
347 significant after correcting for multiple testing of the various inversions. Therefore, the  
348 cosmopolitan inversions do not appear to play major roles in diapause induction. We  
349 also investigated the functional annotation categories of SNPs associated with  
350 diapause. The vast majority of diapause-associated SNPs were found in non-coding  
351 regions: upstream/downstream of annotated genes, or in introns (S4 Table). However,  
352 there was little signal of enrichment or de-enrichment for particular classes of diapause-  
353 associated SNPs relative to permutations (S5 Table).

354

### 355 **Linkage is not responsible for the polygenic basis of diapause**

356 Collectively, these results suggest that many loci throughout the genome contribute  
357 to phenotypic variation in diapause. We speculated that the nature of our mapping  
358 population might increase linkage disequilibrium (LD), potentially causing large linkage  
359 blocks to be associated with diapause. To test this possibility, we examined the general  
360 signal of LD in our mapping population in contrast with a wild-derived population from  
361 North Carolina (the *Drosophila* Genetic Reference Panel, or DGRP [77]). We also  
362 analyzed the 68 parental lines that produced the hybrid swarm, and randomly down-  
363 sampled the DGRP to 68 lines for comparison. Four to five generations of mating  
364 reduced LD in the hybrids relative to the parental lines (Fig 4A-B; compare pink and  
365 teal). The LD of the DGRP is slightly lower than that of the hybrid swarm (compare  
366 orange and teal); however, this effect is partially mediated by number of lines, as the  
367 down-sampled DGRP (yellow) had higher LD than the hybrid swarm at larger distances.  
368 None of the mapping populations demonstrated substantial long-distance LD between  
369 arms of the same chromosome or across chromosomes (Fig 4C-E). Therefore, while LD  
370 between nearby SNPs may contribute to some signal in the GWAS, the polygenic signal  
371 is not solely due to linkage, since LD drops below 0.05 within ~10 kb in the F4s and F5s  
372 of the hybrid swarm.

373

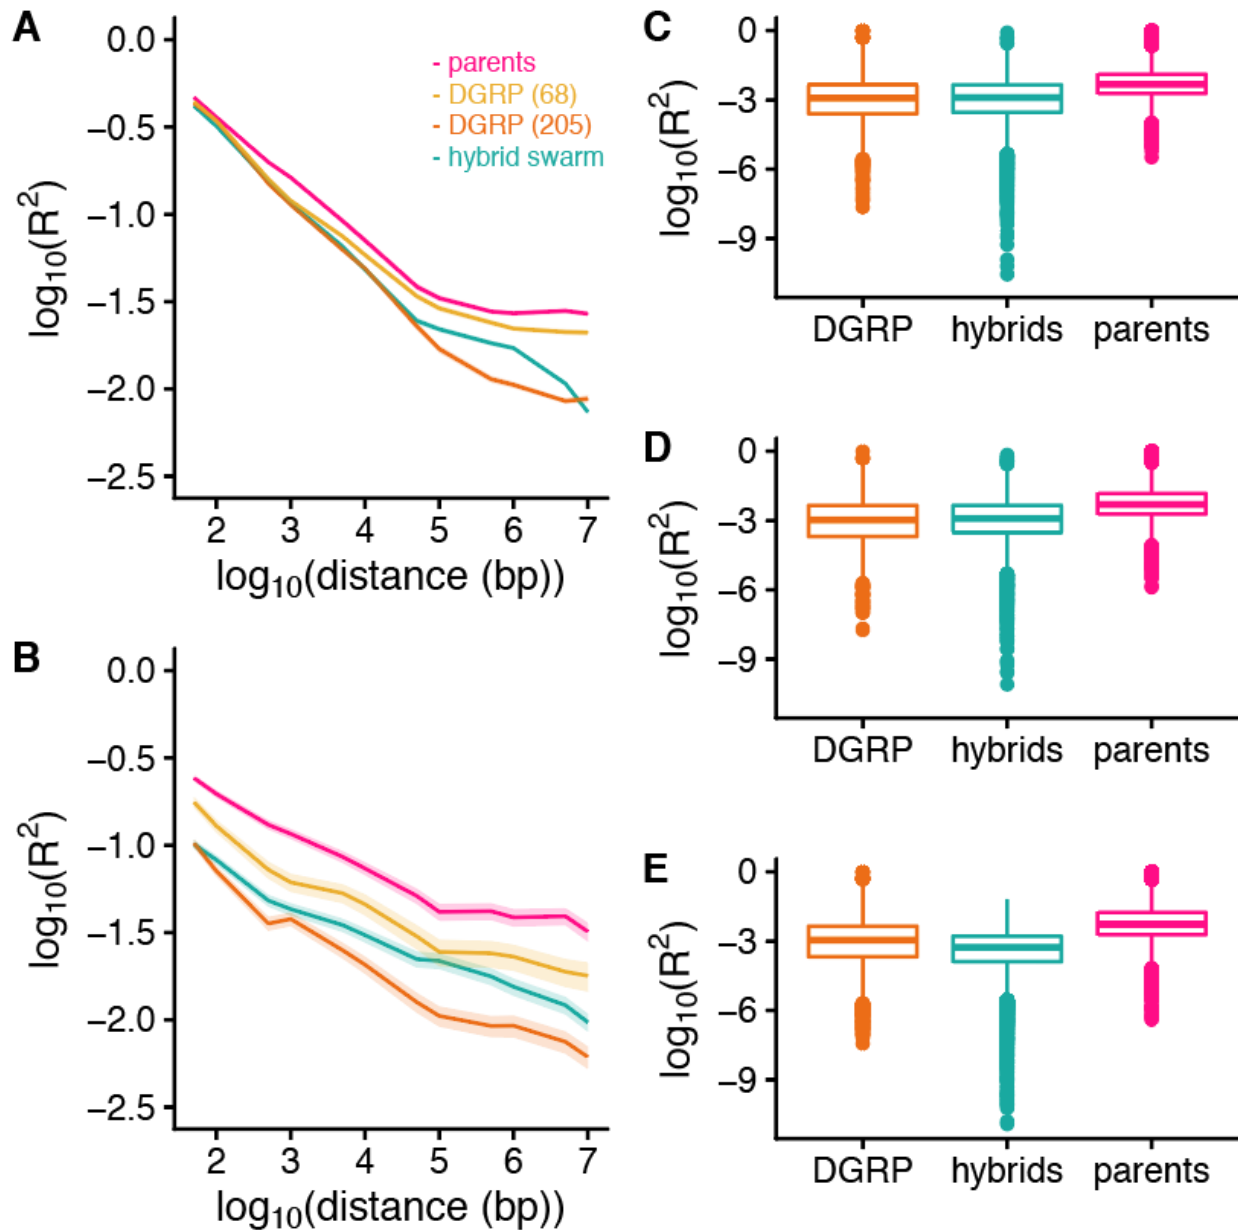

374  
375

376 **Fig 4. Analysis of linkage disequilibrium supports a polygenic basis of diapause.**

377 (A-B): Linkage disequilibrium (LD) decay in the hybrid swarm (teal) contrasted to the  
378 DGRP (orange), DGRP down-sampled to 68 lines (yellow), and hybrid swarm parents  
379 (pink) in common (minor allele frequency > 0.1, A) and rare (MAF < 0.05, B) SNPs.  
380 10,000 SNPs were randomly sampled from common SNPs with minor allele frequency  
381 (MAF) > 0.1 or rare SNPs with MAF < 0.05. LD ( $R^2$ ) to nearby SNPs at fixed distances  
382 was measured. Lines represent median LD; ribbons represent the 95% confidence  
383 intervals. (C-E) Long distance LD between pairs of SNPs randomly sampled from 2L  
384 and 2R (C), 3L and 3R (D), or sampled from different chromosomes (E). All analysis  
385 was conducted on populations A and B combined.

386  
387  
388  
389  
390  
391  
392  
393  
394  
395  
396  
397  
398  
399  
400  
401  
402  
403  
404  
405  
406  
407  
408  
409  
410  
411  
412  
413  
414  
415  
416  
417  
418  
419  
420  
421

### **Diapause-associated SNPs are likely to be clinal, but not seasonal**

We tested for signatures of local adaptation across space (a north to south cline in North America) and time (between fall and spring) by intersecting the GWAS results with existing datasets of spatiotemporal SNP variation in *D. melanogaster* [53,78]. Based on *D. melanogaster*'s natural history [18,19], we predicted that pro-diapause alleles (which increase diapause in the GWAS) would be at higher frequency in the north and in the spring. We used LASSO SNPs as well as genome-wide quantile thresholds to conduct this analysis. We calculated a polygenic score [79,80] by multiplying the clinal or seasonal effect size (including sign) by the GWAS effect size and sign and summing this product across all SNPs, all LASSO SNPs, the top 0.01% of the GWAS, or the top 0.1% of the GWAS (see S6 Table and Materials and Methods for details). In this test, we predict that concordant signal in the GWAS and the clinal/seasonal datasets should result in positive numbers that exceed permutations.

We first compared our data to the results from Bergland *et al* (2014), which sampled allele frequencies across a latitudinal cline and also identified SNPs that repeatedly oscillate in allele frequency between spring and fall in a single Pennsylvania orchard over three years. We found that in population A and both populations combined, the average clinal polygenic score of the actual data was positive and exceeded the permutations for the stage 8 diapause phenotype for the top 0.01% and 0.1% of GWAS SNPs (Fig. 5A). Therefore, the combination of many small-effect alleles that vary clinally could produce the clinal variation of diapause observed in North America. This trend was not observed in LASSO SNPs, suggesting that LASSO SNPs may not be the subset of SNPs with the greatest ecological relevance, or that the clinal signal that we observe is partially driven by some linked sites among quantile-ranked SNPs. No strong trends were observed for the SNPs associated with stage 10 diapause, suggesting the possibility of different spatial selection pressures on SNPs underlying the two phenotypes. Furthermore, no strong seasonal trends were observed for either phenotype (Fig 5B), suggesting that pro-diapause alleles in our mapping population do not repeatedly increase in frequency in spring relative to fall in natural populations. We performed the same analysis on data collected by Machado *et al* (2019), which also sampled a cline and compared spring and fall allele frequencies in 20 populations sampled from North America and Europe. We observed a similar trend of clinal signal in diapause-associated alleles for the stage 8, but not stage 10, data, but limited parallelism of diapause effects and seasonal signal in this dataset (S12 Fig).

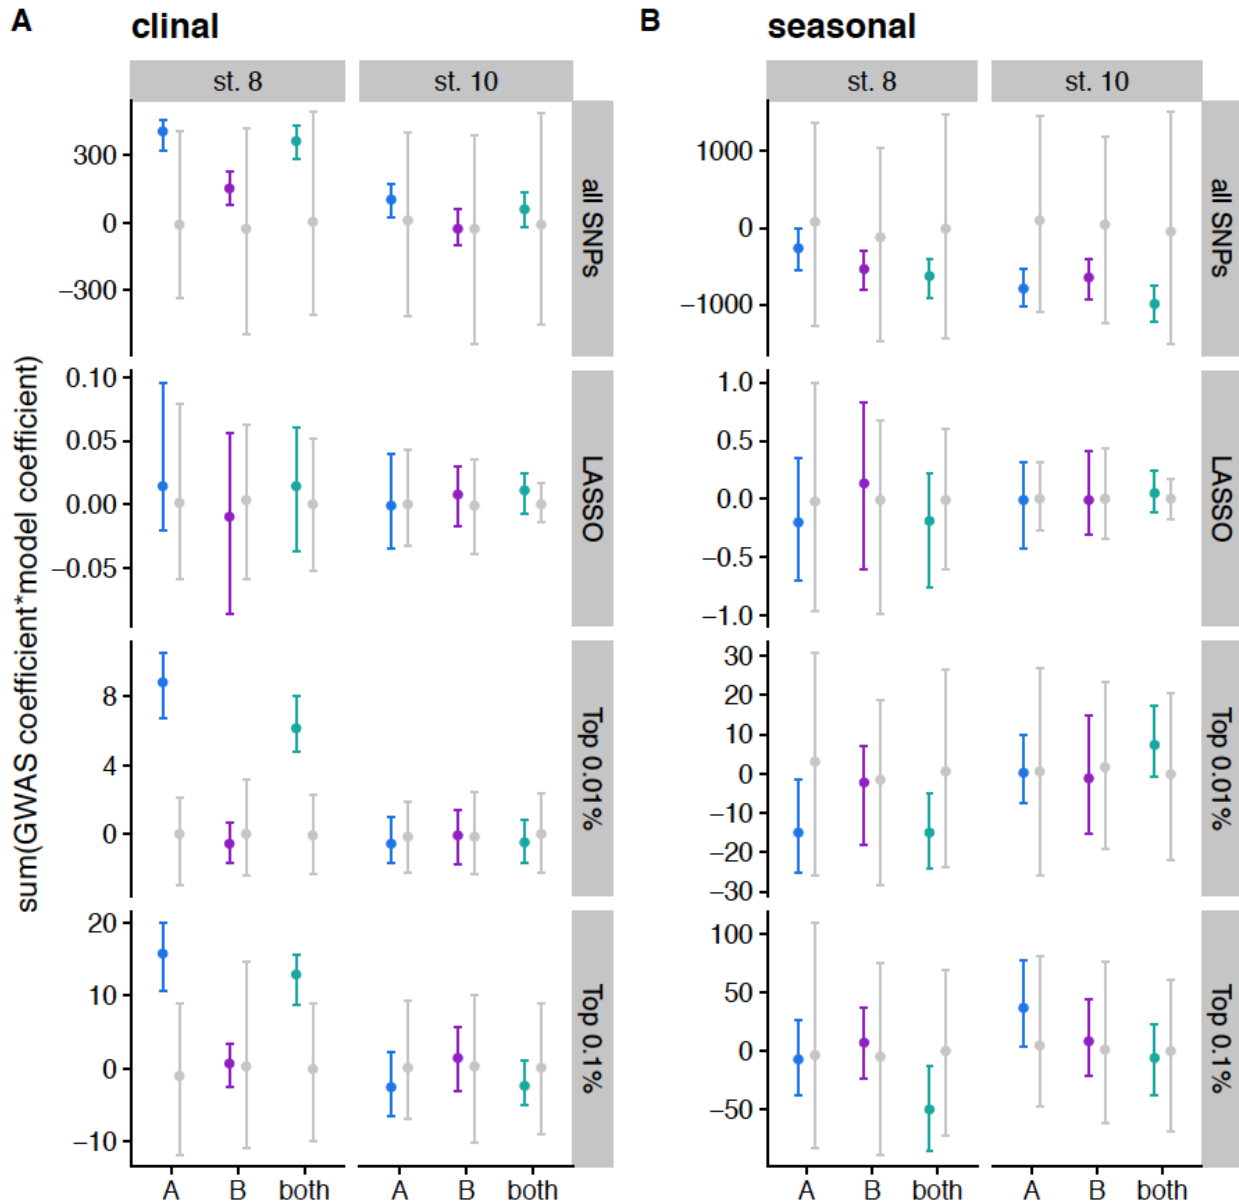

422

423

424

425

426

427

428

429

430

431

432

433

**Fig 5. SNPs associated with diapause at stage 8 vary predictably across**

**latitudinal clines.** A) Polygenic scores calculated by multiplying clinal effect size reported in Bergland *et al* (2014) and GWAS effect size for each SNP and summing across all SNPs, LASSO SNPs, the top 0.01% of the GWAS, and the top 0.1% of the GWAS. Effect sizes are polarized such that positive numbers indicated pro-diapause alleles are more common in the north. Data are shown with a point for the mean and error bars extending to the 2.5% and 97.5% quantiles. Colored points indicate actual data for 100 imputations of each mapping population; grey points indicate the distribution for permutations. B) Polygenic scores calculated for seasonal data by multiplying seasonal effect size reported in Bergland *et al* (2014) and GWAS effect size, polarized so that pro-diapause and spring are positive.

434

435 The lack of predictable polygenic signal in the seasonal tests led to the intriguing  
436 possibility that diapause might evolve seasonally via changes in allele frequencies of  
437 different SNPs in different populations. We tested for concordant signal of diapause-  
438 associated SNPs among seasonally varying polymorphisms from 20 individual  
439 populations sampled in Machado *et al* 2019 [78]. Some, but not all, populations showed  
440 predictable seasonal allele frequency changes of diapause-associated SNPs (S13 Fig;  
441 S14 Fig), though the direction varied, with some populations showing an excess of pro-  
442 diapause alleles in the spring (positive scores), and others showing an excess of pro-  
443 diapause alleles in the fall (negative scores). Therefore, we suggest that seasonal  
444 evolution of diapause-associated SNPs can and does occur in individual populations,  
445 but in an unpredictable manner across years and populations.

446

### 447 **Hybrid swarms evolve an increased capacity for diapause in the winter in natural** 448 **environments**

449 To study the natural seasonal dynamics of diapause expression, we introduced our  
450 hybrid swarm populations to outdoor cages fed regularly with rotting apples and  
451 bananas to experience semi-natural “wild” conditions (S15 Fig). These cages were not  
452 density controlled and were composed of individuals of various ages because they were  
453 allowed to propagate freely, with overlapping generations. We sampled flies periodically  
454 from these cages over six months and assessed ovary status in the captured females.  
455 Surprisingly, we found that a substantial proportion of flies appeared to be in diapause,  
456 even during the favorable months of summer and early fall. We refer to these flies as  
457 “diapause-like” since they were not placed in the standard laboratory diapause assay as  
458 virgin females. All field-caught samples (G0) from fruit-fed cages (Fig 6A, green lines)  
459 had higher incidence of diapause-like ovaries than a reference sample of flies reared in  
460 lab cages at 25°C (Fig 6A, grey dashed lines). The single highest rate of diapause-like  
461 ovaries for stage 10 was observed from a sample in mid-December that was collected  
462 in sub-freezing conditions (Fig 6C), suggesting that cold temperatures may be one of  
463 several factors that reduce ovary maturation in natural conditions. However, the highest  
464 diapause incidence for stage 8 was observed in October, suggesting other factors  
465 besides cold temperature may contribute as well, and the two phenotypes may respond  
466 to somewhat different signals. Intriguingly, diapause incidence of field caught samples  
467 was quite low in November, even though conditions were cool relative to previous  
468 months. This observation further suggests that environmental factors beyond  
469 temperature mediate ovary development.

470



471

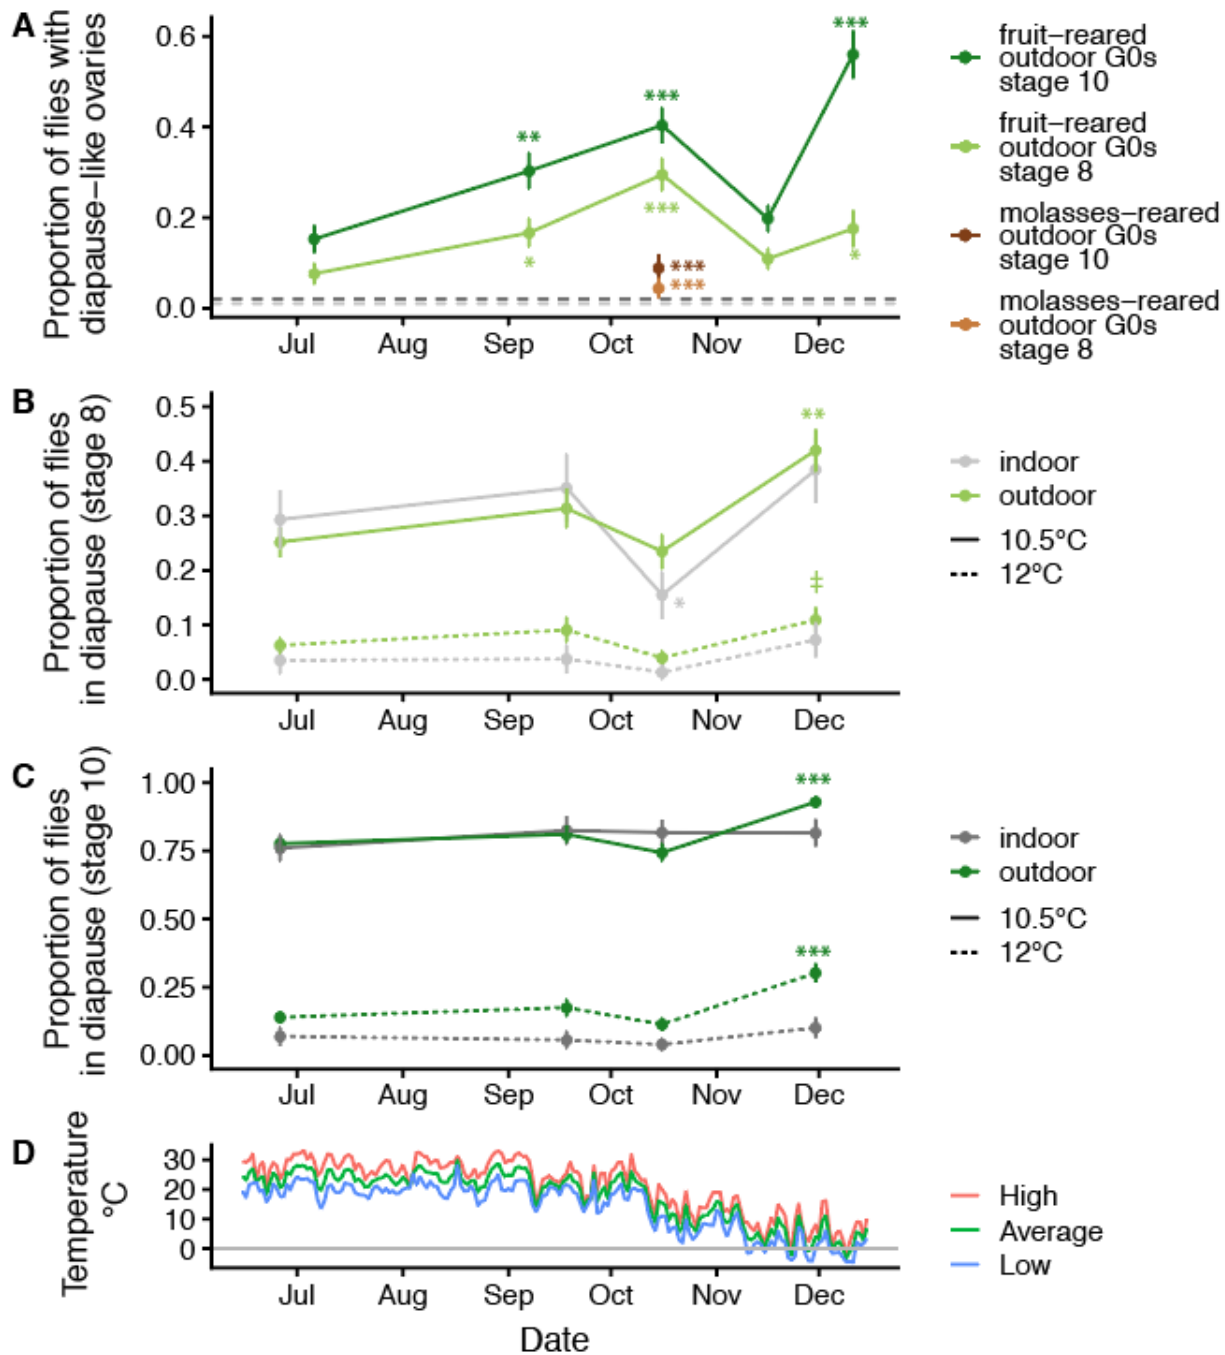

472

473

474 **Fig 6. Plasticity and selection contribute to increased diapause in late fall in field-**  
 475 **reared samples.** (A) Ovaries were dissected from outdoor cage flies reared on fruit and  
 476 diapause was assessed at stage 8 (light green) or 10 (dark green). A general linear  
 477 model was used to determine whether diapause at later collection dates differed  
 478 significantly the first collection on June 26<sup>th</sup>, 2018. (‡  $P < 0.1$ , \*  $P < 0.05$ , \*\*  $P < 0.01$ , \*\*\*  
 479  $P < 1 \times 10^{-4}$ ). Samples were also collected at a single time point from cages reared on  
 480 cornmeal-molasses food (brown). This sample had significantly lower diapause

481 incidence than fruit-reared samples collected one day later at both stages. The  
482 horizontal grey lines indicate diapause incidence for stage 8 (light grey) and stage 10  
483 (dark grey) in a single sample of 96 mated, 5-8 day old flies reared in laboratory cages  
484 on cornmeal-molasses food. (B) Field cage and laboratory cage flies were collected at  
485 several timepoints and reared in the lab for two generations before assessing diapause  
486 at stage 8 in the standard assay at either 10.5 °C (solid lines) or 12 °C (dashed lines).  
487 Diapause was marginally increased in the December outdoor sample at 12 °C ( $P =$   
488  $0.08$ ) and significantly increased in December at 10.5 °C ( $P = 0.0002$ ), whereas it  
489 remained relatively consistent across indoor flies. (C) Same as B, but phenotypes for  
490 stage 10 diapause. Diapause increased in the December sample of outdoor cage flies  
491 relative to the first sample from June (general linear model,  $P = 3.7 \times 10^{-5}$  at 12 °C,  $P =$   
492  $6.1 \times 10^{-5}$  at 10.5 °C), while diapause was consistent across samples in the lab-reared  
493 flies ( $P > 0.05$  for all pairwise comparisons). (D) Weather Underground temperature  
494 data during the field season for Carter Mountain, VA, approximately 2 km from our field  
495 site.

496  
497 Diapause in the field was influenced by nutrition: flies sampled from a separate set  
498 of outdoor cages that were fed cornmeal-molasses food revealed a much lower  
499 proportion of flies in diapause when compared to fruit-reared flies captured just one day  
500 later (Fig 6A; compare brown and green points in October). Therefore, fruit  
501 consumption, or the microbiota associated with fruit in the wild [81], may cause reduced  
502 ovary maturation relative to standard lab medium. This finding agrees with our result  
503 that live yeast diminishes diapause (S3 Fig); the large quantity of deactivated yeast  
504 present in the cornmeal-molasses food, or other nutritional differences between the two  
505 substrates [82], may have enhanced ovary development in outdoor flies fed standard  
506 food. However, we cannot rule out additional differences between indoor and outdoor  
507 cages since density and age of sampled flies were not controlled in the outdoor cages.  
508 Nonetheless, the fruit-fed cages, which more closely resemble the environment of wild  
509 flies in an orchard or compost pile, may more accurately represent the natural state of  
510 investment in reproduction in the wild; rich laboratory fly medium may permit more  
511 oogenesis than normally occurs in nature [83–86].

512 To test the hypothesis that evolved genetic changes in the outdoor populations also  
513 contributed to increased diapause propensity in early winter, we captured seasonal  
514 samples from outdoor cages and reared them in the lab for two generations (“G2”). We  
515 exposed the G2 offspring to diapause-inducing conditions to perform a common-garden  
516 assay of diapause in flies that evolved under natural conditions. We concurrently  
517 sampled flies from our indoor hybrid swarm cages and bred them under identical  
518 conditions as negative controls. We found that the outdoor populations evolved a  
519 significantly increased propensity for diapause in late fall for both diapause phenotypes,  
520 whereas the indoor populations experienced few significant changes in diapause  
521 propensity (Fig 6B; C). This result was observed in flies held at two different diapause-  
522 inducing temperatures (10.5 °C and 12 °C), and the changes in diapause incidence

523 were stronger for stage 10 diapause (Fig 6C) relative to stage 8 (Fig 6B). We note that  
524 both indoor and outdoor cages experienced parallel changes in diapause, likely due to  
525 experimental variation between cohorts. However, the magnitude of change from the  
526 first collection to the final collection was significant for outdoor cages ( $P < 0.05$  for three  
527 of four tests, Fig6B; C) but not indoor cages ( $P > 0.05$  for all tests). The evolved change  
528 in diapause corresponds to the onset in mid-November of sustained cold conditions at  
529 our field site (Fig 6D), suggesting that these conditions may have caused selection for  
530 individuals able to diapause. We note that the results of these field experiments may  
531 have been influenced by potential invasion of wild flies into our field cages, which would  
532 change the genetic composition of the *D. melanogaster* populations. Based on the ratio  
533 of *D. simulans* to *D. melanogaster* at nearby Carter Mountain Orchard in Charlottesville,  
534 VA, we estimate that at most 5% of *D. melanogaster* in the cages were invaders (see  
535 Methods). Collectively, our field results suggest that environmental conditions produce  
536 plastic changes in ovary development and also result in selection for increased  
537 propensity to diapause.

538

### 539 **Diapause-associated SNPs are present at high frequencies in Zambia**

540 Diapause has been proposed to be a recent adaptation to cold in temperate  
541 populations of *D. melanogaster* [12,24,87], but see [35,88]. To test whether the  
542 diapause-associated alleles mapped here are present in ancestral populations, we first  
543 examined the median allele frequency of pro-diapause alleles in a large sample of flies  
544 from Zambia [89,90]. We predicted that pro-diapause alleles would have lower allele  
545 frequencies in Zambia than the pro-diapause alleles identified in permutations. We  
546 found that the actual median allele frequency of pro-diapause alleles generally falls  
547 within the expected range of allele frequencies based on permutations for both  
548 phenotypes when considering all SNPs and LASSO SNPs (Fig 8). However, when  
549 considering the top 0.01% or 0.1% of SNPs in the GWAS, we found that pro-diapause  
550 alleles for diapause at stage 8 are more common than expected by chance in Zambia.  
551 This trend was not observed for the stage 10 phenotype; the allele frequencies for these  
552 SNPs fell within the expected range based on permutation. The high allele frequencies  
553 of stage 8 diapause SNPs is not due to an excess of diapause-associated SNPs in  
554 tracts of European admixture in Zambian flies (S16 Fig). The abundance of pro-  
555 diapause alleles suggests they are longstanding polymorphisms that are not  
556 deleterious, and may even be favorable, in ancestral climates.

557

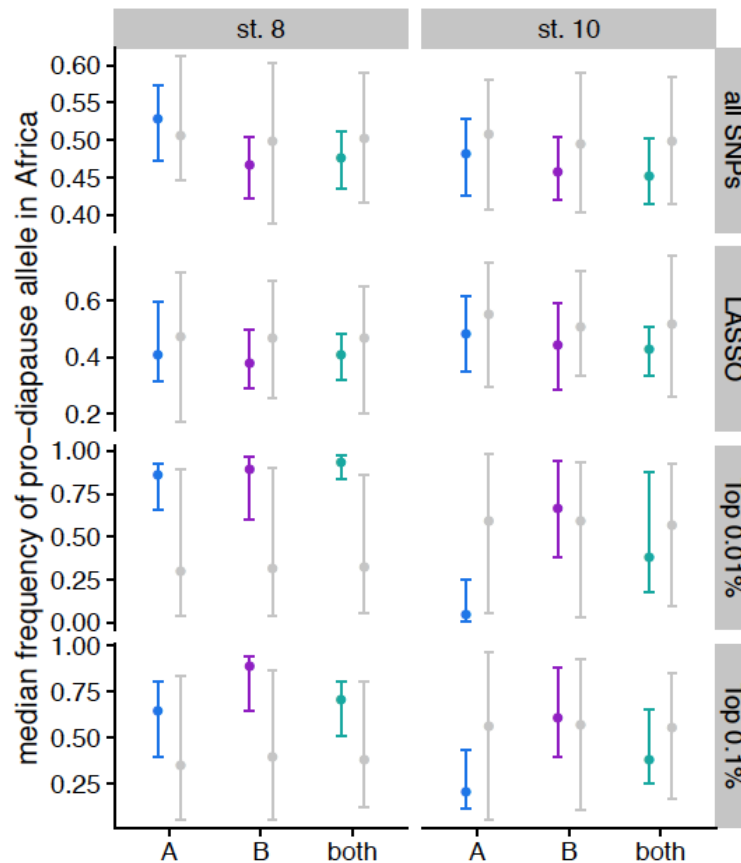

558

559

560 **Fig 7. Diapause-associated alleles are common in Zambia.** The median allele  
 561 frequency of pro-diapause alleles for all SNPs in the GWAS, LASSO SNPs, the top  
 562 0.01% of the GWAS, and the top 0.1% of the GWAS for stage 8 (left) and stage 10  
 563 (right). Points represent median of the imputations/permutations; error bars show 2.5%  
 564 to 97.5% quantiles. Grey points/bars are 100 permutations for populations A and B;  
 565 1000 permutations for both. Colored points/bars are 100 imputations of the original  
 566 data.

567

### 568 **Evidence for partial sweeps of anti-diapause alleles in North America**

569 We tested for signals of partial selective sweeps on pro-diapause alleles in North  
 570 America. We used the DGRP, from Raleigh, North Carolina, [77] and a set of  
 571 sequenced, inbred lines collected from Pennsylvania and Maine (“Northern” lines) to  
 572 calculate the integrated haplotype homozygosity score (iHS) [91] for the pro-diapause  
 573 alleles identified in the GWAS. In this test, an elevated iHS would suggest that the pro-  
 574 diapause allele is found on a longer shared haplotype, suggesting a recent sweep,  
 575 whereas depressed iHS would suggest a sweep of the anti-diapause allele. Median iHS  
 576 of both stage 8 and stage 10 diapause-associated SNPs was generally weakly  
 577 depressed relative to permutations (except for LASSO SNPs, Fig 8B), suggesting the

578 possibility of partial selective sweeps that increased the frequency of anti-diapause  
 579 alleles in both the DGRP and Northern populations. This result is consistent with the  
 580 relatively high frequency of pro-diapause alleles observed in Zambia.  
 581

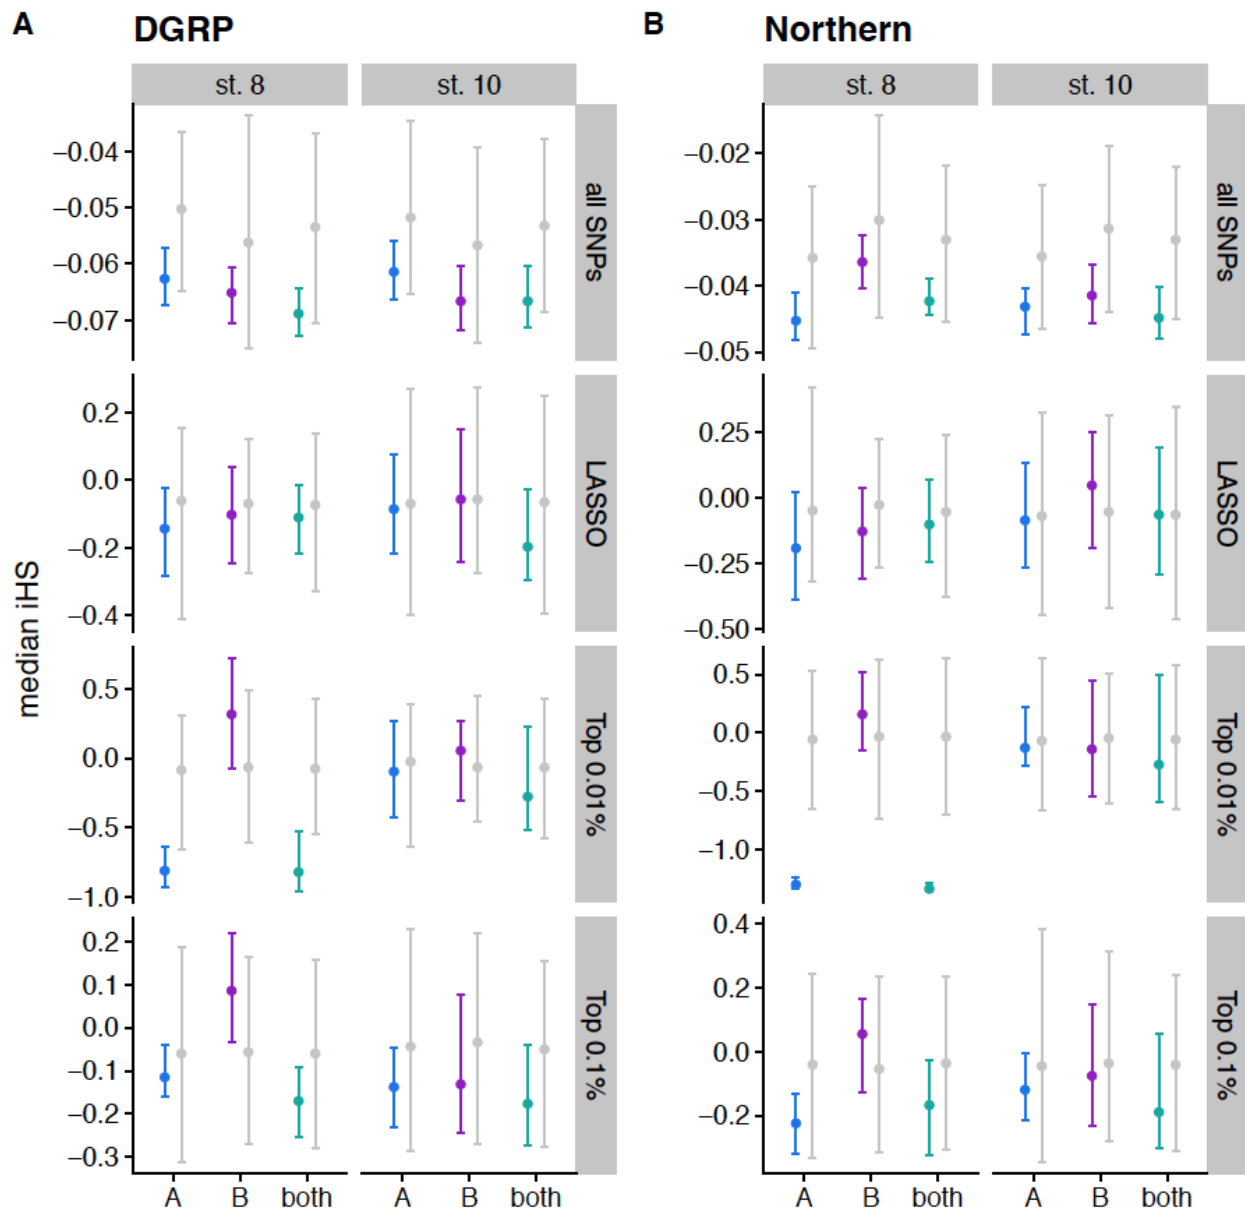

582  
 583

584 **Fig. 8 Integrated haplotype homozygosity score (iHS) of diapause-associated**  
 585 **SNPs in two populations.** (A) iHS was calculated for every SNP in the DGRP. For  
 586 each GWAS, the median iHS was calculated for all SNPs, the LASSO SNPs, the top  
 587 0.01% of SNPs in the GWAS, and the top 0.1% of SNPs in the GWAS for each  
 588 phenotype. Points represent the median; error bars extend to the 2.5% to 97.5%  
 589 quantiles. Colored bars are 100 imputations of the original data. Grey bars are 100

590 permutations for populations A and B; 1000 permutations for both. (B) Same as panel  
591 A, but using a set of 205 lines collected from Pennsylvania and Maine (“Northern”).

592

## 593 Discussion

594

### 595 The genetic basis of an ecologically relevant trait identified from mapping in a 596 hybrid swarm

597 Herein, we estimated the genetic architecture of natural variation in ovarian  
598 diapause in *D. melanogaster* using a novel hybrid-swarm based mapping strategy. Our  
599 work changes the interpretation of the genetic basis of variation in diapause in *D.*  
600 *melanogaster*, which has previously been characterized as being under the control of a  
601 small number of loci with large effect using QTL mapping and candidate gene  
602 approaches [27,52,60,76]. We studied spatiotemporal variation of small-effect,  
603 diapause-associated alleles in global *D. melanogaster* populations, finding evidence  
604 that both pro- and anti-diapause alleles have experienced selection in different  
605 geographic regions and seasons.

606 The SNPs we identify, which are generally unremarkable in a genomic context (Fig  
607 5; Fig 7; Fig 8), are evidence of “gold dust” for an ecologically relevant trait: alleles that  
608 are likely critical to evolutionary processes but nonetheless have neither large  
609 phenotypic effects nor dramatic genomic signatures of selection [92]. Our analysis of  
610 clinal variation in diapause-associated SNPs is evidence that the accumulation of subtle  
611 allele frequency differences in many SNPs with slight phenotypic effects may produce  
612 phenotypic differences across broad geographic scales. Whether spatial and temporal  
613 selection on these SNPs is due to selection for diapause or selection for correlated traits  
614 with a shared genetic basis remains unknown. However, collectively these  
615 unexceptional polymorphisms can contribute to ecologically important variation. The  
616 lack of strong genomic signals in diapause-associated SNPs relative to randomly  
617 identified SNPs suggests that perhaps a large fraction of polymorphisms in *D.*  
618 *melanogaster* could play roles in other complex traits [93] that may have experienced  
619 varying degrees of spatiotemporal selection, recent partial sweeps, and balancing  
620 selection. If many SNPs underlie ecologically relevant phenotypic variation, strong  
621 deviations from the genomic background of patterns of diversity will be the exception,  
622 not the norm. More studies of the evolutionary history of alleles underlying complex  
623 traits will be required to determine whether the pattern we observe for diapause is a  
624 general phenomenon.

625

### 626 Modest heritability and strong environmental control of diapause

627 We find that the heritability of diapause is low but detectable (Fig 3), and we  
628 demonstrate that this heritable variation may be subject to selection under field  
629 conditions (Fig 6). We note that our estimates of individual effects of SNPs are likely

630 underestimates due to the inclusion of a genome-wide genetic relatedness matrix in our  
631 model, which would partially correct away the effect of any given SNP. Like other  
632 studies [24,35,36,94], we identify temperature and nutritional exposure as two critical  
633 variables that influence diapause and extend this analysis to outbred lab and field-  
634 caught samples. Specifically, we find that diapause induction is exquisitely sensitive to  
635 extremely small differences in temperature (Fig 2), emphasizing the importance of  
636 precise thermal control and monitoring for experiments studying diapause in this  
637 species [95]. This fine-grained sensitivity suggests that even temperature variation  
638 across shelves of an incubator or at different distances from a light source could  
639 potentially influence experimental outcomes; these potential sources of thermal  
640 variation were controlled in our experiment by our use of multiple environmental  
641 chambers with nearly identical physical setup aside from temperature and photoperiod.

642 Our finding that diapause was not induced by short day length (but rather by long  
643 days in our experiment, Fig 2) is somewhat consistent with other studies that failed to  
644 find an effect of photoperiod on diapause in *D. melanogaster* [94,95]. However, some  
645 recent studies do observe short-day photoperiodic responses in diapause [88,96]. One  
646 study suggested that light conditions which mimic the natural daily variation of solar  
647 radiation can in fact generate a photoperiodic response [97]. In our study, short days  
648 under rectangular light cycles with standard white LED light did not increase diapause  
649 induction. The slightly increased diapause incidence we observe at longer photoperiods  
650 is surprising and warrants future study. Because we were able to account for  
651 temperature variation on a precise scale, we can rule out the potential of light-mediated  
652 temperature differences. Future experiments should work to disentangle the roles of  
653 temperature, wavelength and variable light intensity on photoperiodism in *D.*  
654 *melanogaster*.

655

### 656 **Different genetic signals underlie unique diapause phenotypes**

657 Throughout our results, we observe different genetic signals underlying diapause  
658 scored at two different developmental stages. Diapause at stage 8 has been used as  
659 the phenotype for most studies of diapause [15,18,19,52]; however, others have argued  
660 that stage 10 is a more biologically relevant phenotype [35]. Stage 8 marks the onset of  
661 vitellogenesis [66], whereas stage 10 requires clearing a major checkpoint in the  
662 ovarian development program before proceeding to yolk-demanding stages [98]. We  
663 find an enrichment of SNPs shared between the two phenotypes, but the population  
664 genetic signals of diapause SNPs tend to be stronger for the stage 8 phenotype. The  
665 SNPs underlying stage 8 diapause vary more predictably clinally (Fig 5), are more likely  
666 to show seasonal variation (S13 Fig), are at higher frequency in Zambian populations  
667 (Fig 7), and show stronger potential selection on anti-diapause alleles (Fig 8). However,  
668 we observed more dramatic seasonal variation in the stage 10 phenotype in our field  
669 study. Combined, these results suggest that the two phenotypes may be influenced by

670 both different genetic architectures and different environmental cues, and therefore may  
671 respond differently to temporally or geographically varying selection. We also note that  
672 the genetic makeup of the mapping population appears to be critically important to the  
673 identification of SNPs associated with a polygenic trait like diapause, consistent with  
674 quantitative genetic variation in diapause being influenced by rare variants.

675

### 676 **Weak clinal signal in alleles underlying a strongly clinal phenotype**

677 Diapause shows strong clinality in both North America [96] and Australia [67], with  
678 flies collected at higher latitudes showing higher diapause incidence in common  
679 gardens. This trend has not been seen in Europe, perhaps due to the high frequency in  
680 southern Europe of a pro-diapause allele that recently arose in Italy [99]. Collective  
681 effect of many weakly clinal diapause-associated alleles is sufficient to produce signal  
682 that is consistent with clinal variation in phenotype (Fig 5). However, this generally weak  
683 trend suggests those SNPs with the strongest clinal signal may not always be the most  
684 ecologically relevant SNPs, at least for some phenotypes. Furthermore, this signal was  
685 not seen when examining unlinked LASSO SNPs, suggesting that some linkage among  
686 top diapause-associated SNPs could potentially contribute to the observed clinal signal.

687 Our evidence of multilocus clinal selection for diapause adds to a growing literature  
688 showing evidence of spatial differentiation of loci underlying complex traits in natural  
689 populations. For example, in *D. melanogaster*, clinal SNPs are also enriched for SNPs  
690 influencing cuticular hydrocarbon content [100]. In gypsy moths, SNPs associated with  
691 three ecologically relevant traits have consistent clinal signals [101], and in corals,  
692 SNPs associated with heat tolerance are more common in warmer reefs and in warmer  
693 microclimates within a single reef [102]. Drought-associated SNPs also show spatial  
694 variation in European populations of *Arabidopsis thaliana* [103], and models suggest  
695 that those populations with more drought-tolerance alleles may adapt to global warming  
696 more effectively. Therefore, in addition to elucidating genetic mechanisms of local  
697 adaptation, the ability to detect polygenic adaptation of ecologically relevant traits over  
698 space is important for predicting population-level changes in response to climate  
699 change.

700

### 701 **Seasonal evolution of diapause may be idiosyncratic**

702 We identified several pieces of evidence for stochastic or unpredictable seasonal  
703 variation in diapause. We observed a genetic shift towards higher diapause in the late  
704 fall in our field experiment (Fig 6) but saw little evidence for repeatable seasonal  
705 variation in pro-diapause alleles across multiple years (Fig 5) or multiple populations  
706 (S12 Fig). The increase in diapause in late fall may not solely be due to selection on the  
707 diapause trait itself; flies that are able to diapause are also more tolerant of cold [15],  
708 which could potentially be the phenotype under selection. If the ability to diapause  
709 makes flies more tolerant of cold, or if diapause and cold tolerance are influenced by



710 some of the same alleles, then selection for cold tolerance in late fall could explain the  
711 increase in diapause. We also found that some individual populations show signals of  
712 seasonal variation in diapause-associated SNPs (S12-S13 Fig), though the direction of  
713 this variation is often the opposite of what we would predict, with pro-diapause alleles  
714 more common in the fall.

715 We propose three possible explanations for the absence of repeatable seasonal  
716 signals in diapause-associated SNPs. First, we note that the seasonality of diapause  
717 has only been tested in mid-latitudes [19 and this study]; more southern or northern  
718 environments may not produce strong seasonal variation in diapause or other life  
719 history traits. In this case, we would not expect to see repeatable seasonal changes in  
720 diapause-associated SNPs across diverse populations. However, two of the populations  
721 in which we observed concordant patterns of allele frequency changes in diapause-  
722 associated alleles were Georgia and Massachusetts (S13-S14 Fig). This observation  
723 suggests that higher and lower latitude populations may also undergo adaptive  
724 seasonal changes in diapause. We also note that the design of our mapping experiment  
725 may have given us greater power to detect clinal signal relative to seasonal signal, due  
726 to the wide geographic spread of our starting lines and relatively few lines of known  
727 seasonal origin.

728 Second, the variants associated with diapause may also be favorable for stress  
729 resistance during seasons other than winter, resulting in a lack of strong spring/fall  
730 differentiation. This possibility is supported by the presence and even excess of pro-  
731 diapause alleles in central African populations, which experience seasonal dry periods  
732 and food limitation as well as cooler temperatures at high elevations [104]. To our  
733 knowledge, this study is the first to examine diapause status in field-caught flies across  
734 seasons. We observed surprisingly high incidence of diapause-like ovaries in outdoor  
735 cage-reared flies over the course of the summer and fall. While high diapause incidence  
736 was observed in December, we also observed increasing diapause throughout the  
737 summer and fall, followed by a dramatic drop in November. This finding suggests that  
738 diapause-like ovaries may be a response to general stress conditions. Indeed,  
739 starvation, heat stress, and crowding are known to cause arrest of oocyte maturation  
740 and degradation of pre-stage 10 egg chambers [83–85,105,106]. Stochastic seasonal  
741 phenotypic evolution has been documented in stick insects (*Timema cristinae*). In  
742 *Timema*, the evolution of the stripe pattern, which is under strong frequency-dependent  
743 selection, is highly predictable across seasons, whereas the evolution of color, which is  
744 under diverse selective pressures, varies unpredictably [107]. Diapause and its  
745 underlying SNPs may be subject to more complex patterns of selection due to  
746 pleiotropy and environmental plasticity, resulting in a general lack of predictably across  
747 populations and years. This possibility is further confounded by the limitations of  
748 endpoint-based sampling. While the populations were broadly sampled in “spring” and

749 “fall”, the particular selective pressures experienced by flies in each sample may have  
750 varied dramatically between locations and years.

751 Lastly, seasonal evolution of diapause may require only a subset of the variants we  
752 identified, resulting in a lack of broad-scale signal across multiple sampling populations  
753 or years. This possibility could occur because only a fraction of the sites are sufficient to  
754 induce adaptive changes, or could possibly be due to false-positives and limited  
755 statistical power in both the GWAS reported here and in the seasonal surveys [53]. The  
756 seasonal model employed by [78] prioritizes SNPs that change in the same direction  
757 across many populations. The pro-diapause variants selected in different populations  
758 may differ from year to year, resulting in a lack of signal when comparing our large  
759 collection of diapause-associated variants to those SNPs with repeatable seasonal  
760 changes in allele frequency. We find evidence for this possibility in our analysis of  
761 individual populations, which revealed consistent changes in the frequency of diapause  
762 associated alleles in some, but not all, populations (S13-14 Fig). Likewise, polygenic  
763 adaptation to thermal regimes in *Drosophila* can use different combinations of genetic  
764 loci, with replicate populations evolving frequency changes in only subsets of the same  
765 alleles when subject to the same selective conditions [108]. However, we did observe  
766 selection for diapausing genotypes in our field data, with flies sampled in late November  
767 showing an increased genetic propensity for diapause. Given the observed phenotypic  
768 shift, we hypothesize that sequencing the late November samples would show an  
769 increase in frequency of at least some pro-diapause alleles relative to samples collected  
770 earlier in the season.

771 Taken together, our results confirm that North American populations carry heritable  
772 and selectable genetic variation for diapause, but the genetic basis of seasonal  
773 selection on this trait may not be repeatable from year to year or population to  
774 population. While strong evidence exists for seasonal variation in the genetic  
775 composition of local *D. melanogaster* populations based on pooled sequencing [53,78],  
776 the loci underlying a single quantitative trait likely do not capture the complexity of the  
777 selective forces driving these allele frequency changes. Interactions between variable  
778 environments, polygenic traits, and pleiotropic alleles may result in a lack of broad-scale  
779 seasonal signal in diapause-associated SNPs.

780

### 781 **Diapause may be an ancestral adaptation coopted for cold**

782 Our results on the evolutionary history of pro-diapause alleles are consistent with  
783 recent work suggesting that diapause is in fact an ancient, polymorphic adaptation in  
784 *Drosophila* [88]. While two studies [12,87] observed negligible diapause incidence in  
785 African lines of *Drosophila*, these studies classified entire isofemale lines as diapausing  
786 or non-diapausing based on at least 50% of individuals having ovarioles developed to  
787 stage 8 [24]. Therefore, it is possible that some individuals were in diapause even if the  
788 entire line was classified as non-diapausing. More recent studies have documented

789 quantitative variation in diapause induction among various African lines of *D.*  
790 *melanogaster* [35,88], as well as other related species [88], using a stage 10 cutoff, but  
791 these studies did not rule out potential introgression of European haplotypes. We find  
792 that alleles promoting diapause are as common, or more common, than expected by  
793 chance in Zambia. Taken together, our genetic data and previously published  
794 phenotypic results suggest that diapause at either stage may in fact be an ancestral trait  
795 that is also polymorphic in related species.

796 Diapause in African flies may be related to cold temperatures at mid to high  
797 elevations [109,110], or to seasonal stressors other than cold, including wet-dry  
798 seasons that influence food availability. Ancestral populations of *D. melanogaster* may  
799 have subsisted on marula, which only fruits for part of the year [104]. As a result, dry  
800 conditions or seasonal lack of food availability may have required intermittent diapause  
801 or estivation. Our data on diapause-associated SNPs in central Africa support this  
802 hypothesis. Interestingly, our data are also consistent with the observation by Bergland  
803 *et al* (2014) that summer-favored alleles of seasonally varying SNPs are more likely to  
804 be rare in Africa. Further, the Zambian data also consistent with the evidence of partial  
805 selective sweeps of anti-diapause alleles in North Carolina and the Northeast.  
806 Collectively, these data suggest diapause may in fact be favored in Zambia, and the  
807 ability to *not* diapause may be favored, at times, in temperate latitudes of North  
808 America. Our findings support a model in which *D. melanogaster* is highly opportunistic,  
809 taking advantage of favorable conditions at any point in the year but also restricting  
810 investment in reproduction when conditions are unfavorable for offspring survival,  
811 whether due to cold, desiccation, starvation, or other stressors.

812

## 813 **Conclusions**

814 Understanding the genetic basis of local adaptation has been a major goal for  
815 evolutionary biology in the genomic era [111,112]. Studying this question in *D.*  
816 *melanogaster*, which exhibits dramatic phenotypic variation across space and time and  
817 offers extensive population genomic resources, allows for a thorough exploration of the  
818 evolutionary history of alleles underlying adaptive phenotypes. Diapause is a particularly  
819 valuable trait to dissect at a genome-wide level because it underlies demonstrable life  
820 history tradeoffs and is relevant to predicting insect responses to changing climate  
821 conditions [113]. The genetic basis of variation in diapause induction has been  
822 investigated in numerous other species and ranges from a single underlying locus in *D.*  
823 *littoralis*, flesh flies and linden bugs [48,114,115], to a few loci of a small effect in the  
824 face fly and European corn borer [116–118], to many loci in mosquitoes and the  
825 speckled wood butterfly [119,120]. With the exception of the wood butterflies, most of  
826 these studies estimated the number of loci using traditional quantitative genetics  
827 approaches; our study is unique in its estimation of the genome-wide genetic  
828 architecture of diapause via association mapping. The association mapping performed

829 here indicates that ancestral variation in this highly polygenic trait contributes in unique  
830 ways to spatial and temporal variation in common selection pressures associated with  
831 life in temperate environments. Whether this result generalizes to other life-history,  
832 behavioral, and physiological traits that underlie local adaptation across time and space  
833 remains an open question.

834 Compared to many insects with hard-programmed diapause that are triggered by  
835 photoperiod and last for months or even years [9], ovarian dormancy in *D. melanogaster*  
836 is short-lived, readily reversible, and highly dependent on present environmental  
837 conditions. These characteristics of diapause in *D. melanogaster* may be a result of the  
838 genetic architecture of the trait, with hundreds or even thousands of SNPs slightly  
839 modulating an individual's propensity to diapause under a variety of unfavorable  
840 conditions. These loci vary somewhat predictably across space but not across time;  
841 nonetheless populations do evolve an increased propensity for diapause in unfavorable  
842 conditions, perhaps via selection of unique allelic combinations in different populations,  
843 or selection for linked traits. On a broad geographic scale, clinal differentiation of  
844 thousands of alleles of small effect results in cumulative genetic effects that produce  
845 latitudinal phenotypic variation. Despite similar patterns of diapause variation over  
846 latitudes and seasons in North America, we conclude that local adaptation relies on  
847 different patterns of selection in space and time to optimize performance in variable  
848 conditions.

849

## 850 **Materials and Methods**

851

### 852 **Construction of custom photoperiod chambers:**

853 We built environmental chambers (S17A-B Fig) from custom-cut opaque black  
854 plastic (Quality Machine Service, Waynesboro, VA). Design files for the machining of  
855 each wall are available upon request. Each chamber was controlled by a Raspberry Pi  
856 Model 3 computer with a static IP address and its own GitHub account running custom  
857 Python scripts (see <https://github.com/berglan-rpi/rpi-02> for an example of scripts). To  
858 improve air circulation and prevent temperature changes associated with lights, four 92  
859 mm computer fans (OutletPC.com) were mounted behind light-proof circular vents (4"  
860 diameter darkroom vents, midgetlouver.com). The two fans on the sides blew air in from  
861 the outside, and fans on the back and top pulled air out to create constant airflow and  
862 reduce the warming produced by lights. A custom circuit board (S17C Fig) was  
863 designed with Fritzing software (fritzing.org). The following electronic components were  
864 directly soldered to each circuit board: TSL2561 Digital Luminosity detector, SHT-31D  
865 Temperature and Humidity Sensor, MCP9808 Temperature sensor, and 74AHCT125  
866 Quad Level Shifter. A 24-LED RGBW Natural White NeoPixel ring was connected to the  
867 circuit board with 22 AWG wire. After the initial mapping experiments, the lights were  
868 replaced with a 64-LED NeoPixel grid. All electronic components were purchased from

869 [www.adafruit.com](http://www.adafruit.com). A custom Python script turned lights on and off for fixed  
870 photoperiods, while recording temperature, light intensity, and humidity every 60  
871 seconds. After the initial mapping experiments, the LED lights were replaced with 64-  
872 LED RGBW Natural white NeoPixel grids for future experiments. The TSL2561 sensor  
873 was used to ensure constant light intensity across boxes for all experiments following  
874 the initial mapping.

875 The boxes were housed in a cold room held at 10°C (S17A Fig). However, we  
876 noticed that there was spatial variation in the actual room temperature, and we exploited  
877 this variation to expose flies to a broad range of temperatures (S3 Fig). To further  
878 modulate temperature, some boxes were outfitted with ZooMed ReptiTherm habitat  
879 heaters in one of three sizes (6x8", 8x12", or 8x18"). We found that these heaters  
880 increased the air temperature in the chambers by approximately 0.5, 1, and 1.5 °C  
881 respectively. We placed all fly vials horizontally on wire racks elevated 3 cm above the  
882 surface of the heaters to prevent directly warming the flies or their vials. We calibrated  
883 the temperature readings in each box by manually recording the temperature at the  
884 position of the fly vials using a high accuracy thermometer (Model EL-WIFI-DTP+;  
885 [www.dataq.com](http://www.dataq.com)) and offsetting the recorded temperatures based on this standardized  
886 reading. Quality control checks of our environmental data revealed that all chambers  
887 had consistent temperatures throughout the course of the experiment (S3A Fig) and  
888 that diurnal temperature fluctuations were limited to approximately 0.25°C (S3B-C Fig).

889

### 890 **Hybrid swarm construction and collection of individuals for phenotyping:**

891 Seventy inbred or isofemale lines spanning seven geographic/seasonal collections  
892 (S1 Table) were chosen to initiate the hybrid swarm: Rocky Ridge Orchard, Bowdoin,  
893 Maine [NCBI BioProject #PRJNA383555]; Ithaca, New York [121]; June and October  
894 collections from Linvilla Orchard, Media, Pennsylvania [122]; the *Drosophila* Genetic  
895 Reference Panel from Raleigh, North Carolina [77]; the Southeastern US [123], and the  
896 Bahamas [123]. Ten inbred/isofemale lines were chosen at random from each  
897 collection, and five lines were randomly assigned to each of two hybrid swarms. We  
898 reassigned approximately five lines in an attempt to balance cosmopolitan inversion  
899 frequencies across the two hybrid swarms (see "Inversion genotyping" below). Two  
900 lines (24,2 and 12LN6-24) produced an insufficient number of offspring to generate F1  
901 crosses, so they were eliminated, and each population was initiated with 34 lines. See  
902 S1 Table for complete information about founding lines.

903 For each population, a total of 4 sets of 34 round-robin crosses were initiated, so  
904 each line appeared in 8 out of 136 total crosses (4 crosses used males from each line, 4  
905 additional crosses used the females). The order of crosses was randomly generated.  
906 Fifteen virgin females and 10 males were placed in a yeasted bottle of cornmeal-  
907 molasses medium and allowed 72 hours to lay eggs. One day prior to the eclosion of  
908 the first adults, the open bottles were placed in a 2m x 2m x 2m cage (Bioquip product #

909 1406C). The flies were given ~5 days to eclose, and then 20 trays of fresh yeasted  
910 cornmeal-molasses food (~800 mL media in a 23 cm x 23 cm tray) were provided on  
911 day 14 to each cage to collect eggs for 48 hours. The trays were incubated at 25°C in a  
912 12:12 light: dark light cycle, 50% relative humidity. After eclosion, 8 of 20 trays were  
913 reintroduced to the cage. For the F3, F4, and F5 generations, 20 trays were provided for  
914 24 hours for egg laying. After egg collection, the food was removed and covered and  
915 incubated at 25 C in a 12:12 light cycle. At the F6 generation, the population size in the  
916 cages was reduced by adding only 10 food trays for 16-24 hours, and the cages were  
917 maintained in this manner for all future generations.

918 To collect individuals for the GWAS, yeasted bottles containing 35 mL of cornmeal-  
919 molasses media were placed in each cage for 3-6 hours to collect F4 and F5  
920 generations. Offspring were incubated for 9-10 days at 25°C on a 12:12 light cycle.  
921 Female flies were collected under light CO<sub>2</sub> anesthesia within 2 hours of eclosion (as  
922 indicated by the presence of folded wings, enlarged/pale abdomen and/or meconium).  
923 20 flies were placed in a vial containing 10 mL of cornmeal-molasses media, and flies  
924 were placed into temperature-controlled chambers within 1 hour of collection. Flies were  
925 distributed to one of 47 chambers assigned to a photoperiod of 9, 11, 13, or 15 hours of  
926 light and a temperature varying between ~10 and 15 °C (S3 Fig). After 13-15 days, the  
927 flies were transferred to fresh food. The flies were snap frozen in liquid nitrogen after  
928 exactly 28 days and stored at -80 °C.

929

### 930 **Yeast supplementation experiment:**

931 We collected virgin female flies from the F20 generation of each cage as described  
932 above and placed vials in 9L:15D light cycles at 5 different temperatures. Half of the  
933 vials were supplemented with a sprinkle of live baker's yeast, and the other half  
934 received no yeast. After four weeks, flies were snap frozen.

935

### 936 **Phenotyping:**

937 Flies were thawed in 70% ethanol, then transferred to a ~100 µL droplet of  
938 phosphate buffered saline for ovary dissection. Two aspects of ovary development were  
939 scored. First, the most advanced, non-egg stage of ovariole observed was recorded.  
940 We recorded stages from 6 (or less) to 11; stages 12-13 were combined into stage 11  
941 [66]. Second, the number of fully formed eggs was counted (counted from 0-15 or  
942 scored as 15+ if more than 15 eggs were present). These phenotypes were later  
943 reduced to three binary phenotypes: diapause at stage 8 (no ovarioles observed past  
944 stage 7), diapause stage 10 (no ovarioles observed past stage 9), or diapause at stage  
945 14 (no mature, stage 14 eggs present).

946 We analyzed the influence of environmental variables (temperature, photoperiod,  
947 generation, population and *Wolbachia* status (see below) using binomial generalized  
948 linear models. We used the R package *car* [124] to estimate the sum of squares

949 explained by each variable with function *Anova()*, and then divided by the total sum of  
950 squares to estimate percent variation explained (PVE).

951

### 952 **DNA extraction and library preparation:**

953 After dissection, fly carcasses were placed in DNA lysis buffer (Agencourt) in a 96  
954 well deep well plate. Forceps were cleaned with ethanol between each individual  
955 dissection to prevent DNA contamination. After completing a 96 well plate, the  
956 carcasses were lysed in a Qiagen TissueLyser using four 2-millimeter stainless steel  
957 beads. The lysates were spun down, transferred to a fresh 96 well plate, and frozen at -  
958 80 °C until further processing (see DNA extraction below). Two randomly chosen blank  
959 wells were left on each 96 well plate to verify plate identity and orientation.

960 DNA was extracted from 20-30 pooled flies (parental strains) or individual flies  
961 (hybrid swarm offspring) using the DNAdvance kit (Agencourt) in 96 well plates  
962 according to manufacturer's instructions. In total, we genotyped 2,823 individual flies.  
963 An RNase treatment was added between wash 1 and wash 2, and the DNA was bound  
964 with fresh beads following the RNase treatment. Sequencing libraries were prepared  
965 using a modified Nextera protocol that permits low volumes and DNA concentrations  
966 [125]. Briefly, DNA was quantified with a Picogreen assay and normalized to 1 ng/μL  
967 with a liquid handling robot. One ng of DNA was used for library preparation with unique  
968 barcode combinations for every sample (barcodes available in supplemental file on  
969 DataDryad). For the parental lines, individual libraries were pooled to obtain equal  
970 concentrations of each line. They were sequenced in a single lane of HiSeqX with  
971 paired-end, 150 bp reads at the Hudson Alpha Institute for Biotechnology. Ten 96-well  
972 libraries of hybrid swarm individuals were pooled for each lane of sequencing so that  
973 ~940 flies and 20 blanks were combined per lane. Library sizes and quality were verified  
974 by Bioanalyzer. Hybrid swarm lanes were sequenced with Illumina HiSeq3000 paired-  
975 end, 150 bp reads at the Oklahoma Medical Research Foundation sequencing center.

976

### 977 **SNP calling in parental genomes:**

978 We resequenced the genomes of all 68 parental lines to confirm their identities and  
979 compared the sequences to published sequences (see S1 Table for SRA accessions of  
980 founding line sequences). Following read merging with *PEAR* [126] and read mapping  
981 to the *Drosophila* genome version R5/dm3 with the *mem* algorithm in *bwa* [127], we  
982 called preliminary SNPs with *GATK's Unified Genotyper* [128]. We found that one line  
983 (12LN6\_41\_B47) did not match previous sequencing, and two other lines (20,17 and  
984 20,28) appeared to be partially contaminated (some chromosomes were accurate,  
985 others had discrepancies from previous sequencing). For these lines, we used our  
986 resequencing data as the only parental genome sequence; for the other lines, we  
987 combined our new sequence data with existing data for higher depth coverage.  
988 Individual gVCF files were generated with *HaplotypeCaller* in *GATK* [128] and then

989 combined into a single parental gVCF with *CombineGVCFs*. We used randomly  
990 sampled known SNPs from the DGRP to calibrate the SNP calls with  
991 *VariantRecalibrator* and *ApplyRecalibration*. We filtered down to two sets of SNPs; one  
992 conservative set of ~1 million SNPs with the highest quality (`ts_filter_level=99`) and a  
993 second more extensive set of ~3.1 million SNPs with a broader range of SNP quality  
994 (`ts_filter_level=99.9`). The former set of more high-confidence SNPs was used for  
995 genome reconstruction; the latter set was further filtered as described below and used  
996 for the GWAS to allow us to test more SNPs for trait association. For reconstruction  
997 purposes, heterozygous sites in the parental lines were treated as missing data.

998

#### 999 ***Wolbachia* status:**

1000 To determine whether inbred lines and hybrids were infected with *Wolbachia*, we  
1001 counted the number of sequencing reads mapping to the *Wolbachia* genome (which  
1002 was part of our reference genome) and divided that number by the total number of  
1003 reads mapping to chromosomes 2L, 2R, 3L, 3R, and X. This ratio produced a clearly  
1004 bimodal distribution, with individuals falling into two groups: those with a ratio of  
1005 substantially less than 1:1000 (0.001) and those with a ratio greater than 1:1000. We  
1006 classified all individuals in the former group as *Wolbachia*-negative, and the latter  
1007 individuals as *Wolbachia*-positive.

1008

#### 1009 **Hybrid swarm genome reconstruction:**

1010 Paired end reads were merged and mapped as described above. Bam files were  
1011 then processed through our in-house genome reconstruction pipeline [63] Briefly,  
1012 polymorphic reads were counted with *ASEReadCounter* in *GATK* [128] with a minimum  
1013 mapping quality score of 10. *HARP* [129] was used to preliminarily call parental  
1014 haplotypes. The top 14 possible founders were then used for precise genome  
1015 reconstruction in *RABBIT* [130]. The output of *RABBIT* was translated to phased diploid  
1016 genotypes using a custom script [63]. All lines included in the founding populations were  
1017 recovered following reconstruction of the F4 and F5 generations of the hybrid swarm  
1018 (S18 Fig). The median proportion of the genome derived from a line was 2.7% (range =  
1019 0.5% - 9%; expected =  $1/34 = 2.9\%$ ). Of over 800,000 private SNPs in the founding  
1020 lines, only 109 SNPs were lost in the hybrid swarm, suggesting that virtually all founding  
1021 haplotypes were recovered at least once in the sequenced hybrid swarm.

1022

#### 1023 **Recombination simulation and accuracy calculations:**

1024 We generated hybrid swarms *in silico* using the genotypes of our founding lines and  
1025 the pipeline described in Weller and Bergland 2019 [63]. Genome sequences for each  
1026 parental line were generated with *FastaAlternateReferenceMaker* in *GATK* [128] with  
1027 flag `use_IUPAC_sample` to generate ambiguous bases at heterozygous sites. We  
1028 simulated F4 and F5 generations for populations A and B based on recombination rates



1029 in [131] (S19 Fig). For each population and generation, we constructed 100 replicate  
1030 populations of 10,000 individuals and randomly chose 5 individuals from each  
1031 population. Simulated reads at 0.5X coverage for recombinant individuals were  
1032 generated with *wgsim* (<https://github.com/lh3/wgsim>). These reads were mapped to  
1033 dm3, and the simulated hybrid genomes were reconstructed as described above. To  
1034 determine the accuracy of reconstruction, the known genotypes of the simulated  
1035 individual were compared to the reconstructed genotypes, and the proportion of sites  
1036 with identical genotypes was calculated. Sites that were missing or heterozygous in the  
1037 actual founder genotypes were excluded from the accuracy calculation. We found that  
1038 for both sets of founders, the majority of individuals were > 99.9% accurate (S20 Fig).  
1039 We therefore predict similar levels of accuracy in our actual sequencing data.

1040

#### 1041 **Masking regions with poor reconstruction quality:**

1042 Based on the simulations described above, we found that small genomic segments  
1043 (<1 Mb) from parental haplotypes were over-represented in our reconstructed data (see  
1044 S19 Fig). Haplotypes less than 1 Mb made up ~4% of all simulated genome haplotypes  
1045 but made up ~20% of all reconstructed haplotypes. Therefore, any reconstructed  
1046 segment less than 1Mb was masked from our genotype calls as missing data. To count  
1047 the number of recombination events, any consecutive short (< 1Mb) paths were  
1048 grouped together as an “unknown” parental haplotype, and that single unknown path  
1049 was counted as a parental segment for recombination purposes. If a short path was  
1050 surrounded by the same parental haplotype on either side, we “bridged” over it and did  
1051 not count it as an additional recombination event. Following this clean up step, visual  
1052 inspection revealed that the resulting genome reconstructions from both simulated and  
1053 actual sequencing data more closely matched the recombination rate and haplotype  
1054 size predicted by our recombination simulator (S19 Fig); however, the cleaned-up  
1055 reconstructions still significantly differed from the simulated distributions of haplotype  
1056 size and recombination count (Kolmogorov-Smirnov test,  $P < 8 \times 10^{-6}$  for all tests). This  
1057 discrepancy occurred in both the reconstruction of simulated data as well as the  
1058 reconstruction of actual data.

1059

#### 1060 **Imputation of missing data:**

1061 Because the *GENESIS* software package used for the GWAS requires a complete  
1062 dataset and our individuals were drawn from two populations with unique genetic  
1063 composition, we performed a custom imputation of missing data within each population  
1064 separately. The imputation required two steps. First, for any site at which the parental  
1065 line was heterozygous, we randomly chose one allele for each offspring genotype. After  
1066 this step was performed, the remaining missing data (due to missed calls in the parental  
1067 genotyping or masked short segments in the reconstruction) were imputed by taking the  
1068 most likely genotype based on Hardy-Weinberg allele frequencies. This step was

1069 calculated within each hybrid population to accurately capture allele frequency  
1070 differences between the two populations. We repeated this random-choice followed by  
1071 Hardy-Weinberg imputation algorithm 100 times to create 100 uniquely imputed  
1072 genotype sets. All analyses were carried out on all imputed data sets, and the range of  
1073 values for imputations are presented for transparency of the variation that this  
1074 imputation introduces. The Hardy-Weinberg imputation procedure was also used to  
1075 impute allele frequencies for the population genetic analysis (see below).

1076

### 1077 **SNP filtering prior to association mapping:**

1078 We constructed two SNP filters for mapping in our hybrid swarm population. The  
1079 initial results of variant calling (see above) contained ~3.1 million SNPs. We filtered this  
1080 set of SNPs with two additional filters prior to association mapping. The first filter was a  
1081 strict quality control filter to identify SNPs to be used for construction of the genetic  
1082 relatedness matrix (GRM). The second filter was slightly less stringent to produce a  
1083 larger set of SNPs for mapping. For the strict quality control filter, we excluded SNPs  
1084 that had > 10% of genotypes replaced by our imputation algorithm, an  $F_{ST} > 0.2$   
1085 between the two populations (as calculated by *snpGdsHWE()* in *SNPRelate*), SNPs that  
1086 were fixed in one population (but not the other), and SNPs with a Hardy Weinberg  
1087 Equilibrium  $P$ -value of  $< 10^{-20}$  in either population alone or the two populations  
1088 combined. This filtering resulted in ~1.2 million SNPs used for GRM construction. The  
1089 less stringent filter was the same as above, but allowed SNPs that were fixed in one  
1090 population but not the other to remain for the GWAS. This filter resulted in ~2.2 million  
1091 SNPs. After mapping, SNPs were further filtered for minor allele frequency  $> 0.05$  in  
1092 downstream analyses.

1093

### 1094 **Analysis of genetic structure of hybrid populations and parents:**

1095 Principal components were calculated with the function *snpGdsPCA()* in the R  
1096 package *SNPRelate* [132]. Identity by state calculations were performed with  
1097 *snpGdsIBS()*. Karyotypes for each chromosome arm were inferred based on diagnostic  
1098 SNPs identified in [133]. Principal component analysis of reconstructed genotypes  
1099 revealed strong differentiation between populations A and B (S2 Fig), which was also  
1100 evident in the identity by state genetic relatedness matrix of all individuals (S21 Fig).  
1101 Overall, individuals were more related to individuals from the same swarm than from the  
1102 alternate swarm. Therefore, the two hybrid swarm populations represented the full  
1103 genetic diversity of their founding lines and were genetically distinct populations.

1104 We calculated LD decay in the hybrid swarm, the hybrid swarm parents, and the  
1105 DGRP using the *snpGdsLDMat()* function in *SNPRelate*. We randomly sampled 10,000  
1106 SNPs and then identified SNPs that were approximately 0.1, 0.5, 1, 5, 10, 50, 100, 500,  
1107 and 1,000 kb away from the focal SNP (+/- 5%). When multiple SNPs were identified at  
1108 the appropriate distance, a single SNP was randomly chosen. We performed this

1109 calculation for rare (minor allele frequency < 0.05), and common (minor allele frequency  
1110 > 0.1) SNPs.

1111 To calculate long-distance LD, we sampled SNPs in two ways. First, we sampled  
1112 10,000 random pairs of SNPs on opposite arms of chromosomes 2 and 3 (pairs on  
1113 chromosome 2L and 2R, or 3L and 3R). Second, we sampled 30,000 random pairs of  
1114 SNPs on independent chromosomes (e.g., one SNP on chromosome 2 and one SNP  
1115 on chromosome 3.

1116

### 1117 **Inversion genotyping:**

1118 The most likely genotypes at major cosmopolitan inversions in the parental strains  
1119 and hybrid offspring were identified using diagnostic SNPs described in [133]. A  
1120 binomial general linear model accounting for temperature, photoperiod, swarm,  
1121 *Wolbachia*, and generation was used to test for the effect of each cosmopolitan  
1122 inversion on diapause.

1123

### 1124 **Heritability estimation:**

1125 We estimated narrow-sense heritability using *GCTA* [71] using the restricted  
1126 maximum likelihood analysis (REML) method and the Fisher-scoring algorithm [72]. We  
1127 generated a genetic relatedness matrix with the --make-grm flag in *GCTA*. We used the  
1128 same covariates used for association mapping and flags --reml, --reml-alg 1, and --reml-  
1129 bendV to calculate heritability for the original data as well as 1000 permutations of the  
1130 sample ids. Confidence intervals were calculated as 1.96 \* standard error.

1131

### 1132 **Mapping in GENESIS:**

1133 We constructed GRMs using the *snpGdsGRM(method= "Eigenstrat")* function in the  
1134 *SNPRelate* package [132] using all SNPs that passed the mapping filter (see above) for  
1135 both populations combined, as well as populations A and B separately. The appropriate  
1136 GRM was then passed to *GENESIS* [134,135] with the models:

1137

1138  $diapause \sim GRM + temperature + photoperiod + generation + population +$   
1139  $Wolbachia$  (for both populations combined)

1140 or

1141  $diapause \sim GRM + temperature + photoperiod + generation + Wolbachia$  (for  
1142 mapping in populations A and B separately)

1143

1144 to calculate an effect at each SNP. A binomial model was used with diapause (at either  
1145 stage 10 or stage 8) scored as 1 and non-diapause scored as 0. A separate GRM and  
1146 mapping result was calculated for each of the 100 imputed datasets.

1147

### 1148 **Permuted GWAS:**

1149 We performed 1000 permutations of the GWAS using both populations, and 100  
1150 permutations of each single-population GWAS. Phenotypes and environmental  
1151 variables were permuted together so that the environmental effects would remain  
1152 constant across permutations; our permutations shuffled the sample IDs *within* each  
1153 hybrid swarm population to dissociate genotype and phenotype. For each permutation,  
1154 one of the 100 imputed data sets was randomly chosen for genotypes. Identical  
1155 permutations were used for the stage 8 and stage 10 data and for populations A, B, and  
1156 both.

1157

#### 1158 **LASSO SNPs:**

1159 We used LASSO to identify a subset of informative SNPs out of the top 10,000  
1160 SNPs (ranked by *P*-value) calculated in each GWAS using the *cv.biglasso()* function the  
1161 R package *biglasso* [136]. After filtering for a minor allele frequency of > 0.05 in the  
1162 mapping population, the genotypes for the top 10,000 GWAS SNPs were added to a  
1163 LASSO model that included temperature, photoperiod, generation, *Wolbachia*, and 32  
1164 principal components. We ran three models: 1) environment only, 2) environment +  
1165 principal components and 3) environment + principal components + 10,000 genotypes.  
1166 SNPs retained in model 3 are referred to as “LASSO SNPs”. We also used  
1167 *snpGdsLDMat()* from *SNPRelate* to calculate LD among LASSO SNPs.

1168

#### 1169 **Receiving operator characteristic (ROC) analysis:**

1170 We used the R packages *ROCR* [75] to analyze the performance of environmental  
1171 data, principal components, and LASSO SNPs in predicting individual phenotypes. The  
1172 predictor variables chosen in each LASSO model were used to predict the stage 8 or  
1173 stage 10 diapause phenotype with the *predict()* function. We then assessed these  
1174 predictions using the *performance()* function with parameters “tpr”, “fpr”, and “auc”.

1175

#### 1176 **SNP annotation:**

1177 We annotated the predicted effects of all SNPs identified in the hybrid swarm using  
1178 *SNPEff* [137] with reference genome BDGP5.75 using default parameters. We grouped  
1179 these annotations into 6 categories: UTR, upstream/downstream (within 5 kb), intronic,  
1180 intergenic, synonymous, and non-synonymous. For each imputation and permutation of  
1181 the GWAS, we calculated the percentage of LASSO SNPs and top SNPs falling into  
1182 each annotation category. We then compared the percentage of SNPs in each category  
1183 in the permutations to the percentage of SNPs in that category in the observed data. To  
1184 assign a *P*-value, we took the median percentage of the 100 imputations of the  
1185 observed data and identified its quantile rank in the permutations. In this test, *P*-values  
1186 of below 0.05 are indicative of a potential de-enrichment relative to permutations,  
1187 whereas *P*-values above 0.95 are indicative of an enrichment.

1188

1189 **Clinal and seasonal polygenic score analysis:**

1190 We examined spatiotemporal variation of diapause-associated SNPs using two  
1191 previously generated datasets. Bergland *et al* (2014) sampled a cline from Florida to  
1192 Maine and identified SNPs with repeatable seasonal changes in allele frequency in a  
1193 single Pennsylvania orchard over the course of three years. Additionally, we used the  
1194 data from Machado *et al* (2019), which also sampled a cline and calculated genome-  
1195 wide seasonal changes in allele frequency across 20 populations sampled from North  
1196 America and Europe. We re-calculated clinal *P*-values for all SNPs in the Machado *et al*  
1197 (2019) dataset using a wider latitudinal spread than originally calculated. For each  
1198 location near the East Coast (Homestead, FL; Athens, GA; Hahia, GA; Eutawville, SC;  
1199 Charlottesville, VA; Media, PA; State College, PA; Lancaster, MA; Ithaca, NY; Bowdoin,  
1200 ME), the average allele frequency across all sampling times was calculated for each  
1201 SNP. These allele frequencies were corrected for the number of individuals sequenced  
1202 and read depth as in [78], then regressed to latitude in a binomial general linear model.  
1203 The effect sizes (beta) from the general linear model were extracted to determine the  
1204 significance and direction of the cline.

1205 We calculated polygenic scores [121,138–140] using the effect sizes and signs (the  
1206 Score statistic from *GENESIS* for ranked SNPs or the coefficient from the LASSO  
1207 model for LASSO SNPs) from the GWAS and the clinal and seasonal effect sizes  
1208 described above. We then multiplied the GWAS effect by the clinal or seasonal effect  
1209 for each SNP and summed these products across all tested SNPs. These tests were  
1210 polarized such that SNPs with concordant signals (i.e., those where the pro-diapause  
1211 allele is more common in the north or in the spring) will result in positive values for this  
1212 score, whereas SNPs with discordant signals will result in negative values. We repeated  
1213 this calculation for the permutations and compared the actual average polygenic scores  
1214 to those calculated in the permutations.

1215 We used a slightly different procedure to calculate polygenic scores for individual  
1216 populations from [78]. We logit-transformed the fall and spring allele frequencies for  
1217 each population and then subtracted the transformed fall frequency from the  
1218 transformed spring frequency. This difference in logit allele frequencies was then  
1219 multiplied by the GWAS effect size and summed as described above.

1220

1221 **Field experiment:**

1222 To test whether our hybrid swarm populations carried seasonally selectable genetic  
1223 variation for diapause, we placed hybrid swarm individuals (generation 30) into six  
1224 outdoor field cages near Charlottesville, VA (37°57'33.5"N 78°28'18.5"W) in early June  
1225 2018. Three cages were initiated with each hybrid swarm population. Each cage was  
1226 constructed around a dwarf peach tree and fed with approximately 3 kg of Red  
1227 Delicious apples and 3 kg of bananas every week until November, when feeding was  
1228 reduced to biweekly. Feeding was stopped in mid-December. Each cage was founded

1229 with approximately 3,000 flies that were then allowed to reproduce in overlapping  
1230 generations. We sampled these populations, as well as the indoor hybrid swarm cages  
1231 multiple times during the summer and fall (“G0” samples). For some collections, we  
1232 dissected the field caught females to determine whether the ovaries appeared to be in  
1233 diapause.

1234 Because other Drosophilid species, including *D. simulans*, infiltrated our cages, it is  
1235 possible that some of the G0 females dissected were in fact *D. simulans*; however, we  
1236 never observed more than approximately 10% *simulans* males in any collection. It is  
1237 also possible that some wild *D. melanogaster* infiltrated the cages. At Carter Mountain  
1238 Orchard, which is located approximately 2 km from our field site, we observed that *D.*  
1239 *simulans* made up 60-100% of all *simulans/melanogaster* individuals over the course of  
1240 our field experiment. Therefore, if at most 10% of flies in the cages were *D. simulans*,  
1241 we conservatively estimate that at most 5% of *D. melanogaster* in the cages were wild  
1242 flies that unintentionally entered the cages.

1243 To determine genetic changes in the propensity to diapause, we reared the sampled  
1244 flies for two generations in the lab. For the first generation, isofemale lines were  
1245 established in vials and offspring males were screened to determine *D. melanogaster* or  
1246 *D. simulans* identity. All *D. melanogaster* G1s were combined and a subset were used  
1247 to establish density-controlled bottles for G2s. The G2s were then assayed for diapause  
1248 using our standard diapause assay (28 days, 9L:15D, either 10.5 or 12°C). We used a  
1249 binomial generalized linear model to compare diapause incidence at each collection  
1250 date to the initial timepoint (June 26<sup>th</sup>). Weather data was downloaded from  
1251 wunderground.com; station ID: KVACHARL73 (Carter Mountain, VA).

1252

### 1253 **Population genetic analysis:**

1254 We calculated allele frequencies from flies collected in Zambia during phase 3 of  
1255 the Drosophila Genome Nexus [89,90]. We used the full sequence FASTA files to  
1256 generate allele frequencies at every SNP via custom scripts  
1257 (<https://github.com/alanberglund/DEST/>). Using the GWAS results, we calculated the  
1258 median allele frequency of the pro-diapause alleles in Zambia and compared these  
1259 values to those generated using the permuted GWAS. To look for overlap with tracts of  
1260 European admixture in Zambian flies, we downloaded the admixture tracts for this  
1261 dataset (<https://www.johnpool.net/genomes.html>) and counted the number of times  
1262 each SNP of interest overlapped with one of these tracts.

1263 We used two North American fly samples to test for selective sweeps. First, we  
1264 used publicly available data from the Drosophila Genetic Resource Panel (DGRP) [77].  
1265 Second, we used a set of 205 inbred lines collected from Pennsylvania and Maine  
1266 (hereafter “Northern lines”). These lines were collected from Media, Pennsylvania in  
1267 June and October of 2012, as well as from Bowdoinham, Maine in October 2012. The  
1268 mapped reads for this dataset are available on the SRA (project number

1269 PRJNA383555). SNPs were called with *HaplotypeCaller* in *GATK* to produce gVCF  
1270 files, combined with *CombineGenotypes*, and filtered for quality based on known SNPs  
1271 from the DGRP. This VCF file was then used in parallel with the DGRP for population  
1272 genetic analysis described below.

1273 We calculated the integrated haplotype homozygosity score (iHS) [91] for every  
1274 SNP in the DGRP or Northern lines using the R package *rehh* [141,142]. Because iHS  
1275 calculation in this package requires complete genotype information, we imputed missing  
1276 genotypes in each dataset based on the most likely genotype given Hardy-Weinberg  
1277 equilibrium as described for the hybrid swarm above. We calculated iHS by assigning  
1278 the pro-diapause allele as the “derived” allele at each SNP based on the Score statistic  
1279 from GENESIS. For each set of SNPs of interest, we calculated the median iHS and  
1280 compared these values to those generated using the permuted GWAS.

1281

### 1282 **Statistical analysis and plotting:**

1283 All analysis was performed using R versions 3.3 to 3.5 [143]. In addition to the  
1284 aforementioned packages, the following packages were used for general analysis and  
1285 plotting: *ggplot2* [144], *cowplot* [145], *data.table* [146], *foreach* [147], *doMC* [148],  
1286 *ggbeeswarm* [149], *lubridate* [150], *maps* [64], and *viridis* [151].

1287

### 1288 **Data accessibility:**

1289 All scripts and code used for data analysis and plotting are available at  
1290 <https://github.com/ericksonp/diapause-scripts-clean>. All raw data and processed data  
1291 used to generate figures are deposited in Data Dryad (available for review at:  
1292 <https://datadryad.org/review?doi=doi:10.5061/dryad.rd465d6>;  
1293 accession # doi:10.5061/dryad.rd465d6). All sequencing reads have been submitted to  
1294 the Sequence Read Archive (BioProject # PRJNA522357).

1295

### 1296 **Acknowledgements**

1297

1298 We thank Helen Stone, Liam Miller, Austin Edwards, and Sasha Bilal for laboratory  
1299 and field assistance. We thank Erin Voss and Robert Porter for technical assistance.  
1300 We thank AnhThu Nguyen from the University of Virginia Genomics Core for assistance  
1301 with library preparation and Graham Wiley from the Oklahoma Medical Research  
1302 Foundation for assistance with Illumina sequencing. We thank Mickey Pawlick and  
1303 employees of Quality Machine Service for their assistance in designing and constructing  
1304 the environmental chambers. We are grateful to David Glover and Richard Davis for  
1305 assistance with the environmental chambers as well as research facility maintenance.  
1306 We thank Andy Wyland at Morven Farms for assistance in establishing and maintaining  
1307 our experimental orchard. We thank Sam Brunjes for helping establish the Raspberry Pi  
1308 network used in the environmental chambers.

1309

1310 **Author contributions:**

1311  
1312 PAE, PS, and AOB conceived of the study. PAE and AOB designed the study. PAE  
1313 and DYS conducted the experiments. PAE and AOB analyzed the data using code  
1314 contributed by CAW. ASB generated the Northern population VCF file. PAE and AOB  
1315 wrote the manuscript. PAE, CAW, PS, and AOB edited the manuscript. PAE and AOB  
1316 obtained funding for the experiments. All authors read and agreed to the manuscript  
1317 prior to submission.

1318

1319 **References**

1320

- 1321 1. Kawecki TJ, Ebert D. Conceptual issues in local adaptation. *Ecol Lett.* 2004;7:  
1322 1225–1241. doi:10.1111/j.1461-0248.2004.00684.x
- 1323 2. Paul MJ, Zucker Irving, Schwartz William J. Tracking the seasons: the internal  
1324 calendars of vertebrates. *Philos Trans R Soc B Biol Sci.* 2008;363: 341–361.  
1325 doi:10.1098/rstb.2007.2143
- 1326 3. Andrés F, Coupland G. The genetic basis of flowering responses to seasonal  
1327 cues. *Nat Rev Genet.* 2012;13: 627–639. doi:10.1038/nrg3291
- 1328 4. Denlinger DL, Hahn DA, Merlin C, Holzapfel CM, Bradshaw WE. Keeping time  
1329 without a spine: what can the insect clock teach us about seasonal adaptation?  
1330 *Phil Trans R Soc B.* 2017;372: 20160257. doi:10.1098/rstb.2016.0257
- 1331 5. Moran NA. The Evolution of Aphid Life Cycles. *Annu Rev Entomol.* 1992;37: 321–  
1332 348. doi:10.1146/annurev.en.37.010192.001541
- 1333 6. Nijhout HF. Development and evolution of adaptive polyphenisms. *Evol Dev.*  
1334 2003;5: 9–18. doi:10.1046/j.1525-142X.2003.03003.x
- 1335 7. Canard M. Seasonal adaptations of green lacewings (Neuroptera: Chrysopidae).  
1336 *Eur J Entomol Ceske Budejovice.* 2005;102: 317.
- 1337 8. Urquhart FA, Urquhart NR. Autumnal migration routes of the eastern population of  
1338 the monarch butterfly (*Danaus p. plexippus* L.; Danaidae; Lepidoptera) in North  
1339 America to the overwintering site in the Neovolcanic Plateau of Mexico. *Can J*  
1340 *Zool.* 1978;56: 1759–1764. doi:10.1139/z78-240
- 1341 9. Tauber MJ, Tauber CA, Masaki S. *Seasonal Adaptations of Insects.* Oxford  
1342 University Press; 1986.
- 1343 10. Denlinger DL. Regulation of Diapause. *Annu Rev Entomol.* 2002;47: 93–122.  
1344 doi:10.1146/annurev.ento.47.091201.145137



- 1345 11. Košťál V. Eco-physiological phases of insect diapause. *J Insect Physiol.* 2006;52:  
1346 113–127. doi:10.1016/j.jinsphys.2005.09.008
- 1347 12. Schmidt P. Evolution and mechanisms of insect reproductive diapause: a plastic  
1348 and pleiotropic life history syndrome. *Mechanisms of Life History Evolution: The*  
1349 *Genetics and Physiology of Life History Traits and Trade-Offs.* 2011. pp. 221–229.
- 1350 13. Tougeron K. Diapause research in insects: historical review and recent work  
1351 perspectives. *Entomol Exp Appl.* 2019;167: 27–36. doi:10.1111/eea.12753
- 1352 14. Bradshaw WE, Armbruster PA, Holzapfel CM. Fitness Consequences of Hibernial  
1353 Diapause in the Pitcher-Plant Mosquito, *Wyeomyia Smithii*. *Ecology.* 1998;79:  
1354 1458–1462. doi:10.1890/0012-9658(1998)079[1458:FCOHDJ]2.0.CO;2
- 1355 15. Schmidt PS, Paaby AB, Heschel MS. Genetic variance for diapause expression  
1356 and associated life histories in *Drosophila melanogaster*. *Evolution.* 2005;59:  
1357 2616–2625.
- 1358 16. Chen C, Xia Q-W, Xiao H-J, Xiao L, Xue F-S. A comparison of the life-history  
1359 traits between diapause and direct development individuals in the cotton  
1360 bollworm, *Helicoverpa armigera*. *J Insect Sci.* 2014;14. doi:10.1093/jis/14.1.19
- 1361 17. Bradshaw WE, Lounibos LP. Evolution of Dormancy and Its Photoperiodic Control  
1362 in Pitcher-Plant Mosquitoes. *Evolution.* 1977;31: 546–567. doi:10.1111/j.1558-  
1363 5646.1977.tb01044.x
- 1364 18. Schmidt PS, Matzkin L, Ippolito M, Eanes WF. Geographic Variation in Diapause  
1365 Incidence, Life-History Traits, and Climatic Adaptation in *Drosophila*  
1366 *Melanogaster*. *Evolution.* 2005;59: 1721–1732. doi:10.1111/j.0014-  
1367 3820.2005.tb01821.x
- 1368 19. Schmidt PS, Conde DR. Environmental Heterogeneity and the Maintenance of  
1369 Genetic Variation for Reproductive Diapause in *Drosophila Melanogaster*.  
1370 *Evolution.* 2006;60: 1602–1611. doi:10.1111/j.0014-3820.2006.tb00505.x
- 1371 20. Paolucci S, Zande L van de, Beukeboom LW. Adaptive latitudinal cline of  
1372 photoperiodic diapause induction in the parasitoid *Nasonia vitripennis* in Europe. *J*  
1373 *Evol Biol.* 2013;26: 705–718. doi:10.1111/jeb.12113
- 1374 21. Posledovich D, Toftegaard T, Wiklund C, Ehrlén J, Gotthard K. Latitudinal  
1375 variation in diapause duration and post-winter development in two pierid  
1376 butterflies in relation to phenological specialization. *Oecologia.* 2015;177: 181–  
1377 190. doi:10.1007/s00442-014-3125-1
- 1378 22. Lehmann P, Lyytinen A, Piironen S, Lindström L. Latitudinal differences in  
1379 diapause related photoperiodic responses of European Colorado potato beetles  
1380 (*Leptinotarsa decemlineata*). *Evol Ecol.* 2015;29: 269–282. doi:10.1007/s10682-  
1381 015-9755-x

- 1382 23. Klepsatel P, Gálíková M, Maio ND, Ricci S, Schlötterer C, Flatt T. Reproductive  
1383 and post-reproductive life history of wild-caught *Drosophila melanogaster* under  
1384 laboratory conditions. *J Evol Biol.* 2013;26: 1508–1520. doi:10.1111/jeb.12155
- 1385 24. Saunders DS, Henrich VC, Gilbert LI. Induction of diapause in *Drosophila*  
1386 *melanogaster*: photoperiodic regulation and the impact of arrhythmic clock  
1387 mutations on time measurement. *Proc Natl Acad Sci U S A.* 1989;86: 3748–3752.
- 1388 25. Saunders DS, Richard DS, Applebaum SW, Ma M, Gilbert LI. Photoperiodic  
1389 diapause in *Drosophila melanogaster* involves a block to the juvenile hormone  
1390 regulation of ovarian maturation. *Gen Comp Endocrinol.* 1990;79: 174–184.  
1391 doi:10.1016/0016-6480(90)90102-R
- 1392 26. Saunders DS. *Insect Clocks*, Third Edition. Elsevier; 2002.
- 1393 27. Williams KD, Busto M, Suster ML, So AK-C, Ben-Shahar Y, Leivers SJ, et al.  
1394 Natural variation in *Drosophila melanogaster* diapause due to the insulin-  
1395 regulated PI3-kinase. *Proc Natl Acad Sci.* 2006;103: 15911–15915.  
1396 doi:10.1073/pnas.0604592103
- 1397 28. Liu Y, Liao S, Veenstra JA, Nässel DR. *Drosophila* insulin-like peptide 1 (DILP1) is  
1398 transiently expressed during non-feeding stages and reproductive dormancy. *Sci*  
1399 *Rep.* 2016;6: 26620. doi:10.1038/srep26620
- 1400 29. Schiesari L, Andreatta G, Kyriacou CP, O'Connor MB, Costa R. The Insulin-Like  
1401 Proteins dILPs-2/5 Determine Diapause Inducibility in *Drosophila*. *PLOS ONE.*  
1402 2016;11: e0163680. doi:10.1371/journal.pone.0163680
- 1403 30. Richard DS, Jones JM, Barbarito MR, Stacy Cerula, Detweiler JP, Fisher SJ, et al.  
1404 Vitellogenesis in diapausing and mutant *Drosophila melanogaster*: further  
1405 evidence for the relative roles of ecdysteroids and juvenile hormones. *J Insect*  
1406 *Physiol.* 2001;47: 905–913. doi:10.1016/S0022-1910(01)00063-4
- 1407 31. Richard DS, Rybczynski R, Wilson TG, Wang Y, Wayne ML, Zhou Y, et al. Insulin  
1408 signaling is necessary for vitellogenesis in *Drosophila melanogaster* independent  
1409 of the roles of juvenile hormone and ecdysteroids: female sterility of the *chico1*  
1410 insulin signaling mutation is autonomous to the ovary. *J Insect Physiol.* 2005;51:  
1411 455–464. doi:10.1016/j.jinsphys.2004.12.013
- 1412 32. Gilbert LI, Serafin RB, Watkins NL, Richard DS. Ecdysteroids regulate yolk protein  
1413 uptake by *Drosophila melanogaster* oocytes. *J Insect Physiol.* 1998;44: 637–644.  
1414 doi:10.1016/s0022-1910(98)00020-1
- 1415 33. Andreatta G, Kyriacou CP, Flatt T, Costa R. Aminergic Signaling Controls Ovarian  
1416 Dormancy in *Drosophila*. *Sci Rep.* 2018;8: 2030. doi:10.1038/s41598-018-20407-  
1417 z

- 1418 34. Kubrak OI, Kučerová L, Theopold U, Nässel DR. The Sleeping Beauty: How  
1419 Reproductive Diapause Affects Hormone Signaling, Metabolism, Immune  
1420 Response and Somatic Maintenance in *Drosophila melanogaster*. PLOS ONE.  
1421 2014;9: e113051. doi:10.1371/journal.pone.0113051
- 1422 35. Lirakis M, Dolezal M, Schlötterer C. Redefining reproductive dormancy in  
1423 *Drosophila* as a general stress response to cold temperatures. J Insect Physiol.  
1424 2018;107: 175–185. doi:10.1016/j.jinsphys.2018.04.006
- 1425 36. Ojima N, Hara Y, Ito H, Yamamoto D. Genetic dissection of stress-induced  
1426 reproductive arrest in *Drosophila melanogaster* females. PLOS Genet. 2018;14:  
1427 e1007434. doi:10.1371/journal.pgen.1007434
- 1428 37. Zhao X, Bergland AO, Behrman EL, Gregory BD, Petrov DA, Schmidt PS. Global  
1429 transcriptional profiling of diapause and climatic adaptation in *Drosophila*  
1430 *melanogaster*. Mol Biol Evol. 2015; msv263. doi:10.1093/molbev/msv263
- 1431 38. Kučerová L, Kubrak OI, Bengtsson JM, Strnad H, Nylin S, Theopold U, et al.  
1432 Slowed aging during reproductive dormancy is reflected in genome-wide  
1433 transcriptome changes in *Drosophila melanogaster*. BMC Genomics. 2016;17: 50.  
1434 doi:10.1186/s12864-016-2383-1
- 1435 39. Ragland GJ, Keep E. Comparative transcriptomics support evolutionary  
1436 convergence of diapause responses across Insecta. Physiol Entomol. 2017; n/a-  
1437 n/a. doi:10.1111/phen.12193
- 1438 40. Parker DJ, Ritchie MG, Kankare M. Preparing for Winter: The Transcriptomic  
1439 Response Associated with Different Day Lengths in *Drosophila montana*. G3  
1440 Genes Genomes Genet. 2016;6: 1373–1381. doi:10.1534/g3.116.027870
- 1441 41. Kankare M, Parker DJ, Merisalo M, Salminen TS, Hoikkala A. Transcriptional  
1442 Differences between Diapausing and Non-Diapausing *D. montana* Females  
1443 Reared under the Same Photoperiod and Temperature. PLOS ONE. 2016;11:  
1444 e0161852. doi:10.1371/journal.pone.0161852
- 1445 42. Zhai Y, Dong X, Gao H, Chen H, Yang P, Li P, et al. Quantitative Proteomic and  
1446 Transcriptomic Analyses of Metabolic Regulation of Adult Reproductive Diapause  
1447 in *Drosophila suzukii* (Diptera: Drosophilidae) Females. Front Physiol. 2019;10.  
1448 doi:10.3389/fphys.2019.00344
- 1449 43. Kubrak OI, Kučerová L, Theopold U, Nylin S, Nässel DR. Characterization of  
1450 Reproductive Dormancy in Male *Drosophila melanogaster*. Front Physiol. 2016;7.  
1451 doi:10.3389/fphys.2016.00572
- 1452 44. Izquierdo JI. How does *Drosophila melanogaster* overwinter? Entomol Exp Appl.  
1453 1991;59: 51–58. doi:10.1111/j.1570-7458.1991.tb01485.x

- 1454 45. Machado HE, Bergland AO, O'Brien KR, Behrman EL, Schmidt PS, Petrov DA.  
1455 Comparative population genomics of latitudinal variation in *Drosophila simulans*  
1456 and *Drosophila melanogaster*. *Mol Ecol*. 2016;25: 723–740.  
1457 doi:10.1111/mec.13446
- 1458 46. Ohtsu T, Kimura MT, Hori SH. Energy storage during reproductive diapause in the  
1459 *Drosophila melanogaster* species group. *J Comp Physiol B*. 1992;162: 203–208.  
1460 doi:10.1007/BF00357524
- 1461 47. Higuchi C, Kimura MT. Influence of photoperiod on low temperature acclimation  
1462 for cold-hardiness in *Drosophila auraria*. *Physiol Entomol*. 1985;10: 303–308.  
1463 doi:10.1111/j.1365-3032.1985.tb00051.x
- 1464 48. Lumme J, Oikarinen A. The genetic basis of the geographically variable  
1465 photoperiodic diapause in *Drosophila littoralis*. *Hereditas*. 1977;86: 129–141.  
1466 doi:10.1111/j.1601-5223.1977.tb01221.x
- 1467 49. Lumme J. Phenology and Photoperiodic Diapause in Northern Populations of  
1468 *Drosophila*. In: Dingle H, editor. *Evolution of Insect Migration and Diapause*. New  
1469 York, NY: Springer US; 1978. pp. 145–170. doi:10.1007/978-1-4615-6941-1\_7
- 1470 50. Reis M, Valer FB, Vieira CP, Vieira J. *Drosophila americana* Diapausing Females  
1471 Show Features Typical of Young Flies. *PLOS ONE*. 2015;10: e0138758.  
1472 doi:10.1371/journal.pone.0138758
- 1473 51. Tyukmaeva VI, Salminen TS, Kankare M, Knott KE, Hoikkala A. Adaptation to a  
1474 seasonally varying environment: a strong latitudinal cline in reproductive diapause  
1475 combined with high gene flow in *Drosophila montana*. *Ecol Evol*. 2011;1: 160–  
1476 168. doi:10.1002/ece3.14
- 1477 52. Schmidt PS, Zhu C-T, Das J, Batavia M, Yang L, Eanes WF. An amino acid  
1478 polymorphism in the couch potato gene forms the basis for climatic adaptation in  
1479 *Drosophila melanogaster*. *Proc Natl Acad Sci U S A*. 2008;105: 16207–16211.  
1480 doi:10.1073/pnas.0805485105
- 1481 53. Bergland AO, Behrman EL, O'Brien KR, Schmidt PS, Petrov DA. Genomic  
1482 Evidence of Rapid and Stable Adaptive Oscillations over Seasonal Time Scales in  
1483 *Drosophila*. *PLoS Genet*. 2014;10: e1004775. doi:10.1371/journal.pgen.1004775
- 1484 54. Cogni R, Kuczynski C, Koury S, Lavington E, Behrman EL, O'Brien KR, et al. The  
1485 intensity of selection acting on the couch potato gene--spatial-temporal variation  
1486 in a diapause cline. *Evol Int J Org Evol*. 2014;68: 538–548.  
1487 doi:10.1111/evo.12291
- 1488 55. Pool JE. The Mosaic Ancestry of the *Drosophila* Genetic Reference Panel and the  
1489 *D. melanogaster* Reference Genome Reveals a Network of Epistatic Fitness  
1490 Interactions. *Mol Biol Evol*. 2015;32: 3236–3251. doi:10.1093/molbev/msv194

- 1491 56. Hsu S-K, Jakšić AM, Nolte V, Lirakis M, Kofler R, Barghi N, et al. Rapid sex-  
1492 specific adaptation to high temperature in *Drosophila*. Tautz D, Ebert D, Reisser  
1493 C, editors. *eLife*. 2020;9: e53237. doi:10.7554/eLife.53237
- 1494 57. Lankinen P, Tyukmaeva VI, Hoikkala A. Northern *Drosophila montana* flies show  
1495 variation both within and between cline populations in the critical day length  
1496 evoking reproductive diapause. *J Insect Physiol*. 2013;59: 745–751.  
1497 doi:10.1016/j.jinsphys.2013.05.006
- 1498 58. Kimura MT. Quantitative response to photoperiod during reproductive diapause in  
1499 the *Drosophila auraria* species-complex. *J Insect Physiol*. 1990;36: 147–152.  
1500 doi:10.1016/0022-1910(90)90115-V
- 1501 59. Tatar M, Chien SA, Priest NK. Negligible Senescence during Reproductive  
1502 Dormancy in *Drosophila melanogaster*. *Am Nat*. 2001;158: 248–258.  
1503 doi:10.1086/321320
- 1504 60. Tauber E, Zordan M, Sandrelli F, Pegoraro M, Osterwalder N, Breda C, et al.  
1505 Natural Selection Favors a Newly Derived timeless Allele in *Drosophila*  
1506 *melanogaster*. *Science*. 2007;316: 1895–1898. doi:10.1126/science.1138412
- 1507 61. Levins R. *Evolution in Changing Environments: Some Theoretical Explorations*.  
1508 Princeton University Press; 1968.
- 1509 62. Ragland GJ, Armbruster PA, Meuti ME. Evolutionary and functional genetics of  
1510 insect diapause: a call for greater integration. *Curr Opin Insect Sci*. 2019;36: 74–  
1511 81. doi:10.1016/j.cois.2019.08.003
- 1512 63. Weller CA, Bergland AO. Accurate, ultra-low coverage genome reconstruction and  
1513 association studies in Hybrid Swarm mapping populations. *bioRxiv*. 2019; 671925.  
1514 doi:10.1101/671925
- 1515 64. Becker R, Wilks A, Brownrigg R, Minka T, Deckmyn A. *maps: Draw Geographical*  
1516 *Maps*. 2018. Available: <https://CRAN.R-project.org/package=maps>
- 1517 65. Middleton CA, Nongthomba U, Parry K, Sweeney ST, Sparrow JC, Elliott CJ.  
1518 Neuromuscular organization and aminergic modulation of contractions in the  
1519 *Drosophila* ovary. *BMC Biol*. 2006;4: 17. doi:10.1186/1741-7007-4-17
- 1520 66. King RC. *Ovarian development in Drosophila melanogaster*. Academic Press;  
1521 1970.
- 1522 67. Lee SF, Sgrò CM, Shirriffs J, Wee CW, Rako L, van Heerwaarden B, et al.  
1523 Polymorphism in the couch potato gene clines in eastern Australia but is not  
1524 associated with ovarian dormancy in *Drosophila melanogaster*. *Mol Ecol*. 2011;20:  
1525 2973–2984. doi:10.1111/j.1365-294X.2011.05155.x

- 1526 68. Soller M, Bownes M, Kubli E. Mating and sex peptide stimulate the accumulation  
1527 of yolk in oocytes of *Drosophila melanogaster*. *Eur J Biochem*. 1997;243: 732–  
1528 738.
- 1529 69. Soller M, Bownes M, Kubli E. Control of oocyte maturation in sexually mature  
1530 *Drosophila* females. *Dev Biol*. 1999;208: 337–351. doi:10.1006/dbio.1999.9210
- 1531 70. Mirth CK, Nogueira Alves A, Piper MD. Turning food into eggs: insights from  
1532 nutritional biology and developmental physiology of *Drosophila*. *Curr Opin Insect*  
1533 *Sci*. 2019;31: 49–57. doi:10.1016/j.cois.2018.08.006
- 1534 71. Yang J, Lee SH, Goddard ME, Visscher PM. GCTA: a tool for genome-wide  
1535 complex trait analysis. *Am J Hum Genet*. 2011;88: 76–82.  
1536 doi:10.1016/j.ajhg.2010.11.011
- 1537 72. Yang J, Benyamin B, McEvoy BP, Gordon S, Henders AK, Nyholt DR, et al.  
1538 Common SNPs explain a large proportion of the heritability for human height. *Nat*  
1539 *Genet*. 2010;42: 565–569. doi:10.1038/ng.608
- 1540 73. Tibshirani R. Regression Shrinkage and Selection via the Lasso. *J R Stat Soc Ser*  
1541 *B Methodol*. 1996;58: 267–288.
- 1542 74. Wu TT, Chen YF, Hastie T, Sobel E, Lange K. Genome-wide association analysis  
1543 by lasso penalized logistic regression. *Bioinformatics*. 2009;25: 714–721.  
1544 doi:10.1093/bioinformatics/btp041
- 1545 75. Sing T, Sander O, Beerenwinkel N, Lengauer T. ROCr: visualizing classifier  
1546 performance in R. *Bioinformatics*. 2005;21: 3940–3941.  
1547 doi:10.1093/bioinformatics/bti623
- 1548 76. Sandrelli F, Tauber E, Pegoraro M, Mazzotta G, Cisotto P, Landskron J, et al. A  
1549 Molecular Basis for Natural Selection at the timeless Locus in *Drosophila*  
1550 *melanogaster*. *Science*. 2007;316: 1898–1900. doi:10.1126/science.1138426
- 1551 77. Mackay TFC, Richards S, Stone EA, Barbadilla A, Ayroles JF, Zhu D, et al. The  
1552 *Drosophila melanogaster* Genetic Reference Panel. *Nature*. 2012;482: 173–178.  
1553 doi:10.1038/nature10811
- 1554 78. Machado HE, Bergland AO, Taylor R, Tilk S, Behrman E, Dyer K, et al. Broad  
1555 geographic sampling reveals predictable and pervasive seasonal adaptation in  
1556 *Drosophila*. *bioRxiv*. 2019; 337543. doi:10.1101/337543
- 1557 79. Berg JJ, Coop G. A Population Genetic Signal of Polygenic Adaptation. *PLOS*  
1558 *Genet*. 2014;10: e1004412. doi:10.1371/journal.pgen.1004412
- 1559 80. Beissinger T, Kruppa J, Cavero D, Ha N-T, Erbe M, Simianer H. A Simple Test  
1560 Identifies Selection on Complex Traits. *Genetics*. 2018;209: 321–333.  
1561 doi:10.1534/genetics.118.300857

- 1562 81. Pais IS, Valente RS, Sporniak M, Teixeira L. *Drosophila melanogaster* establishes  
1563 a species-specific mutualistic interaction with stable gut-colonizing bacteria. *PLOS*  
1564 *Biol.* 2018;16: e2005710. doi:10.1371/journal.pbio.2005710
- 1565 82. Stone HM, Erickson PA, Bergland AO. Phenotypic plasticity, but not adaptive  
1566 tracking, underlies seasonal variation in post-cold hardening freeze tolerance of  
1567 *Drosophila melanogaster*. *Ecol Evol.* 2020;10: 217–231. doi:10.1002/ece3.5887
- 1568 83. Drummond-Barbosa D, Spradling AC. Stem Cells and Their Progeny Respond to  
1569 Nutritional Changes during *Drosophila* Oogenesis. *Dev Biol.* 2001;231: 265–278.  
1570 doi:10.1006/dbio.2000.0135
- 1571 84. Terashima J, Bownes M. Translating Available Food Into the Number of Eggs Laid  
1572 by *Drosophila melanogaster*. *Genetics.* 2004;167: 1711–1719.  
1573 doi:10.1534/genetics.103.024323
- 1574 85. Terashima J, Takaki K, Sakurai S, Bownes M. Nutritional status affects 20-  
1575 hydroxyecdysone concentration and progression of oogenesis in *Drosophila*  
1576 *melanogaster*. *J Endocrinol.* 2005;187: 69–79. doi:10.1677/joe.1.06220
- 1577 86. Lee KP, Simpson SJ, Clissold FJ, Brooks R, Ballard JWO, Taylor PW, et al.  
1578 Lifespan and reproduction in *Drosophila*: New insights from nutritional geometry.  
1579 *Proc Natl Acad Sci.* 2008;105: 2498–2503. doi:10.1073/pnas.0710787105
- 1580 87. Fabian DK, Lack JB, Mathur V, Schlötterer C, Schmidt PS, Pool JE, et al. Spatially  
1581 varying selection shapes life history clines among populations of *Drosophila*  
1582 *melanogaster* from sub-Saharan Africa. *J Evol Biol.* 2015;28: 826–840.  
1583 doi:10.1111/jeb.12607
- 1584 88. Zonato V, Collins L, Pegoraro M, Tauber E, Kyriacou CP. Is diapause an ancient  
1585 adaptation in *Drosophila*? *J Insect Physiol.* 2017;98: 267–274.  
1586 doi:10.1016/j.jinsphys.2017.01.017
- 1587 89. Lack JB, Cardeno CM, Crepeau MW, Taylor W, Corbett-Detig RB, Stevens KA, et  
1588 al. The *Drosophila* Genome Nexus: A Population Genomic Resource of 623  
1589 *Drosophila melanogaster* Genomes, Including 197 from a Single Ancestral Range  
1590 Population. *Genetics.* 2015;199: 1229–1241. doi:10.1534/genetics.115.174664
- 1591 90. Lack JB, Lange JD, Tang AD, Corbett-Detig RB, Pool JE. A Thousand Fly  
1592 Genomes: An Expanded *Drosophila* Genome Nexus. *Mol Biol Evol.* 2016;  
1593 msw195. doi:10.1093/molbev/msw195
- 1594 91. Voight BF, Kudravalli S, Wen X, Pritchard JK. A Map of Recent Positive  
1595 Selection in the Human Genome. *PLOS Biol.* 2006;4: e72.  
1596 doi:10.1371/journal.pbio.0040072

- 1597 92. Rockman MV. The QTN Program and the Alleles That Matter for Evolution: All  
1598 That's Gold Does Not Glitter. *Evol Int J Org Evol*. 2012;66: 1–17.  
1599 doi:10.1111/j.1558-5646.2011.01486.x
- 1600 93. Boyle EA, Li YI, Pritchard JK. An Expanded View of Complex Traits: From  
1601 Polygenic to Omnigenic. *Cell*. 2017;169: 1177–1186.  
1602 doi:10.1016/j.cell.2017.05.038
- 1603 94. Emerson KJ, Uyemura AM, McDaniel KL, Schmidt PS, Bradshaw WE, Holzapfel  
1604 CM. Environmental control of ovarian dormancy in natural populations of  
1605 *Drosophila melanogaster*. *J Comp Physiol A*. 2009;195: 825–829.  
1606 doi:10.1007/s00359-009-0460-5
- 1607 95. Anduaga AM, Nagy D, Costa R, Kyriacou CP. Diapause in *Drosophila*  
1608 *melanogaster* – Photoperiodicity, cold tolerance and metabolites. *J Insect Physiol*.  
1609 2018;105: 46–53. doi:10.1016/j.jinsphys.2018.01.003
- 1610 96. Pegoraro M, Tauber E. Photoperiod-dependent expression of MicroRNA in  
1611 *Drosophila*. *bioRxiv*. 2018; 464180. doi:10.1101/464180
- 1612 97. Nagy D, Andreatta G, Bastianello S, Martín Anduaga A, Mazzotta G, Kyriacou CP,  
1613 et al. A Semi-natural Approach for Studying Seasonal Diapause in *Drosophila*  
1614 *melanogaster* Reveals Robust Photoperiodicity. *J Biol Rhythms*. 2018;33: 117–  
1615 125. doi:10.1177/0748730417754116
- 1616 98. McCall K. Eggs over easy: cell death in the *Drosophila* ovary. *Dev Biol*. 2004;274:  
1617 3–14. doi:10.1016/j.ydbio.2004.07.017
- 1618 99. Pegoraro M, Zonato V, Tyler ER, Fedele G, Kyriacou CP, Tauber E. Geographical  
1619 analysis of diapause inducibility in European *Drosophila melanogaster*  
1620 populations. *J Insect Physiol*. 2017;98: 238–244.  
1621 doi:10.1016/j.jinsphys.2017.01.015
- 1622 100. Rajpurohit S, Hanus R, Vrkoslav V, Behrman EL, Bergland AO, Petrov D, et al.  
1623 Adaptive dynamics of cuticular hydrocarbons in *Drosophila*. *J Evol Biol*. 2017;30:  
1624 66–80. doi:10.1111/jeb.12988
- 1625 101. Friedline CJ, Faske TM, Lind BM, Hobson EM, Parry D, Dyer RJ, et al.  
1626 Evolutionary genomics of gypsy moth populations sampled along a latitudinal  
1627 gradient. *Mol Ecol*. 2019;0. doi:10.1111/mec.15069
- 1628 102. Bay RA, Palumbi SR. Multilocus Adaptation Associated with Heat Resistance in  
1629 Reef-Building Corals. *Curr Biol*. 2014;24: 2952–2956.  
1630 doi:10.1016/j.cub.2014.10.044
- 1631 103. Exposito-Alonso M, Vasseur F, Ding W, Wang G, Burbano HA, Weigel D.  
1632 Genomic basis and evolutionary potential for extreme drought adaptation in  
1633 *Arabidopsis thaliana*. *Nat Ecol Evol*. 2018;2: 352. doi:10.1038/s41559-017-0423-0



- 1634 104. Mansourian S, Enjin A, Jirle EV, Ramesh V, Rehermann G, Becher PG, et al. Wild  
1635 African *Drosophila melanogaster* Are Seasonal Specialists on Marula Fruit. *Curr*  
1636 *Biol.* 2018 [cited 13 Dec 2018]. doi:10.1016/j.cub.2018.10.033
- 1637 105. Wilson TG. Determinants of oöcyte degeneration in *Drosophila melanogaster*. *J*  
1638 *Insect Physiol.* 1985;31: 109–117. doi:10.1016/0022-1910(85)90015-0
- 1639 106. Gruntenko NE, Rauschenbach IY. Interplay of JH, 20E and biogenic amines under  
1640 normal and stress conditions and its effect on reproduction. *J Insect Physiol.*  
1641 2008;54: 902–908. doi:10.1016/j.jinsphys.2008.04.004
- 1642 107. Nosil P, Villoutreix R, Carvalho CF de, Farkas TE, Soria-Carrasco V, Feder JL, et  
1643 al. Natural selection and the predictability of evolution in *Timema* stick insects.  
1644 *Science.* 2018;359: 765–770. doi:10.1126/science.aap9125
- 1645 108. Barghi N, Tobler R, Nolte V, Jakšić AM, Mallard F, Otte KA, et al. Genetic  
1646 redundancy fuels polygenic adaptation in *Drosophila*. *PLOS Biol.* 2019;17:  
1647 e3000128. doi:10.1371/journal.pbio.3000128
- 1648 109. Pitchers W, Pool JE, Dworkin I. Altitudinal Clinal Variation in Wing Size & Shape  
1649 in African *Drosophila melanogaster*: One Cline or Many? *Evol Int J Org Evol.*  
1650 2013;67: 438–452. doi:10.1111/j.1558-5646.2012.01774.x
- 1651 110. Klepsatel P, Gálíková M, Huber CD, Flatt T. Similarities and Differences in  
1652 Altitudinal Versus Latitudinal Variation for Morphological Traits in *Drosophila*  
1653 *Melanogaster*. *Evolution.* 2014;68: 1385–1398. doi:10.1111/evo.12351
- 1654 111. Savolainen O, Lascoux M, Merilä J. Ecological genomics of local adaptation. *Nat*  
1655 *Rev Genet.* 2013;14: 807–820. doi:10.1038/nrg3522
- 1656 112. Hoban S, Kelley JL, Lotterhos KE, Antolin MF, Bradburd G, Lowry DB, et al.  
1657 Finding the Genomic Basis of Local Adaptation: Pitfalls, Practical Solutions, and  
1658 Future Directions. *Am Nat.* 2016;188: 379–397. doi:10.1086/688018
- 1659 113. Bale JS, Hayward S a. L. Insect overwintering in a changing climate. *J Exp Biol.*  
1660 2010;213: 980–994. doi:10.1242/jeb.037911
- 1661 114. Doležel D, Vaněčková H, Šauman I, Hodkova M. Is period gene causally involved  
1662 in the photoperiodic regulation of reproductive diapause in the linden bug,  
1663 *Pyrrhocoris apterus*? *J Insect Physiol.* 2005;51: 655–659.  
1664 doi:10.1016/j.jinsphys.2005.01.009
- 1665 115. Han B, Denlinger DL. Mendelian Inheritance of Pupal Diapause in the Flesh Fly,  
1666 *Sarcophaga bullata*. *J Hered.* 2009;100: 251–255. doi:10.1093/jhered/esn082
- 1667 116. Kim Y, Krafur ES, Bailey TB, Zhao S. Mode of inheritance of face fly diapause  
1668 and its correlation with other developmental traits. *Ecol Entomol.* 1995;20: 359–  
1669 366. doi:10.1111/j.1365-2311.1995.tb00468.x

- 1670 117. Ikten C, Skoda SR, Hunt TE, Molina-Ochoa J, Foster JE. Genetic Variation and  
1671 Inheritance of Diapause Induction in Two Distinct Voltine Ecotypes of *Ostrinia*  
1672 *nubilalis* (Lepidoptera: Crambidae). *Ann Entomol Soc Am.* 2011;104: 567–575.  
1673 doi:10.1603/AN09149
- 1674 118. Kozak GM, Wadsworth CB, Kahne SC, Bogdanowicz SM, Harrison RG, Coates  
1675 BS, et al. Genomic Basis of Circannual Rhythm in the European Corn Borer Moth.  
1676 *Curr Biol.* 2019;29: 3501-3509.e5. doi:10.1016/j.cub.2019.08.053
- 1677 119. Mori A, Romero-Severson J, Severson DW. Genetic basis for reproductive  
1678 diapause is correlated with life history traits within the *Culex pipiens* complex.  
1679 *Insect Mol Biol.* 2007;16: 515–524. doi:10.1111/j.1365-2583.2007.00746.x
- 1680 120. Pruisscher P, Nylin S, Gotthard K, Wheat CW. Genetic variation underlying local  
1681 adaptation of diapause induction along a cline in a butterfly. *Mol Ecol.* 2018;27:  
1682 3613–3626. doi:10.1111/mec.14829
- 1683 121. Grenier JK, Arguello JR, Moreira MC, Gottipati S, Mohammed J, Hackett SR, et  
1684 al. Global diversity lines - a five-continent reference panel of sequenced  
1685 *Drosophila melanogaster* strains. *G3 Bethesda Md.* 2015;5: 593–603.  
1686 doi:10.1534/g3.114.015883
- 1687 122. Behrman E, Howick H, Kapun M, Staubach F, Bergland B, Petrov D, et al. Rapid  
1688 seasonal evolution in innate immunity of wild *Drosophila melanogaster*. *Proc R*  
1689 *Soc B Biol Sci.* 2018;285: 20172599. doi:10.1098/rspb.2017.2599
- 1690 123. Kao JY, Zubair A, Salomon MP, Nuzhdin SV, Campo D. Population genomic  
1691 analysis uncovers African and European admixture in *Drosophila melanogaster*  
1692 populations from the south-eastern United States and Caribbean Islands. *Mol*  
1693 *Ecol.* 2015;24: 1499–1509. doi:10.1111/mec.13137
- 1694 124. Fox J, Weisberg S. *An R Companion to Applied Regression, Third Edition.*  
1695 Thousand Oaks, CA: Sage; 2019. Available:  
1696 <https://socialsciences.mcmaster.ca/jfox/Books/Companion/>
- 1697 125. Baym M, Kryazhimskiy S, Lieberman TD, Chung H, Desai MM, Kishony R.  
1698 Inexpensive Multiplexed Library Preparation for Megabase-Sized Genomes.  
1699 *PLOS ONE.* 2015;10: e0128036. doi:10.1371/journal.pone.0128036
- 1700 126. Zhang J, Kobert K, Flouri T, Stamatakis A. PEAR: a fast and accurate Illumina  
1701 Paired-End reAd mergeR. *Bioinforma Oxf Engl.* 2014;30: 614–620.  
1702 doi:10.1093/bioinformatics/btt593
- 1703 127. Li H, Durbin R. Fast and accurate short read alignment with Burrows-Wheeler  
1704 transform. *Bioinforma Oxf Engl.* 2009;25: 1754–1760.  
1705 doi:10.1093/bioinformatics/btp324

- 1706 128. McKenna A, Hanna M, Banks E, Sivachenko A, Cibulskis K, Kernytsky A, et al.  
1707 The Genome Analysis Toolkit: a MapReduce framework for analyzing next-  
1708 generation DNA sequencing data. *Genome Res.* 2010;20: 1297–1303.  
1709 doi:10.1101/gr.107524.110
- 1710 129. Kessner D, Turner TL, Novembre J. Maximum likelihood estimation of frequencies  
1711 of known haplotypes from pooled sequence data. *Mol Biol Evol.* 2013;30: 1145–  
1712 1158. doi:10.1093/molbev/mst016
- 1713 130. Zheng C, Boer MP, van Eeuwijk FA. Reconstruction of Genome Ancestry Blocks  
1714 in Multiparental Populations. *Genetics.* 2015;200: 1073–1087.  
1715 doi:10.1534/genetics.115.177873
- 1716 131. Comeron JM, Ratnappan R, Bailin S. The Many Landscapes of Recombination in  
1717 *Drosophila melanogaster*. *PLOS Genet.* 2012;8: e1002905.  
1718 doi:10.1371/journal.pgen.1002905
- 1719 132. Zheng X, Levine D, Shen J, Gogarten SM, Laurie C, Weir BS. A high-performance  
1720 computing toolset for relatedness and principal component analysis of SNP data.  
1721 *Bioinforma Oxf Engl.* 2012;28: 3326–3328. doi:10.1093/bioinformatics/bts606
- 1722 133. Kapun M, Fabian DK, Goudet J, Flatt T. Genomic Evidence for Adaptive Inversion  
1723 Clines in *Drosophila melanogaster*. *Mol Biol Evol.* 2016;33: 1317–1336.  
1724 doi:10.1093/molbev/msw016
- 1725 134. Conomos M, Gogarten SM, Brown L, Chen H, Rice K, Sofer T, et al. GENetic  
1726 ESTimation and Inference in Structured samples (GENESIS): Statistical methods  
1727 for analyzing genetic data from samples with population structure and/or  
1728 relatedness. 2019. Available: <https://github.com/UW-GAC/GENESIS>
- 1729 135. Conomos MP, Miller MB, Thornton TA. Robust Inference of Population Structure  
1730 for Ancestry Prediction and Correction of Stratification in the Presence of  
1731 Relatedness. *Genet Epidemiol.* 2015;39: 276–293. doi:10.1002/gepi.21896
- 1732 136. Zeng Y, Breheny P. The biglasso Package: A Memory- and Computation-Efficient  
1733 Solver for Lasso Model Fitting with Big Data in R. *ArXiv170105936 Stat.* 2018  
1734 [cited 24 Feb 2020]. Available: <http://arxiv.org/abs/1701.05936>
- 1735 137. Cingolani P, Platts A, Wang LL, Coon M, Nguyen T, Wang L, et al. A program for  
1736 annotating and predicting the effects of single nucleotide polymorphisms, SnpEff:  
1737 SNPs in the genome of *Drosophila melanogaster* strain w1118; iso-2; iso-3. *Fly*  
1738 (Austin). 2012;6: 80–92. doi:10.4161/fly.19695
- 1739 138. International Schizophrenia Consortium, Purcell SM, Wray NR, Stone JL, Visscher  
1740 PM, O'Donovan MC, et al. Common polygenic variation contributes to risk of  
1741 schizophrenia and bipolar disorder. *Nature.* 2009;460: 748–752.  
1742 doi:10.1038/nature08185

- 1743 139. Marees AT, de Kluiver H, Stringer S, Vorspan F, Curis E, Marie-Claire C, et al. A  
1744 tutorial on conducting genome-wide association studies: Quality control and  
1745 statistical analysis. *Int J Methods Psychiatr Res.* 2018;27: e1608.  
1746 doi:10.1002/mpr.1608
- 1747 140. Rosenberg NA, Edge MD, Pritchard JK, Feldman MW. Interpreting polygenic  
1748 scores, polygenic adaptation, and human phenotypic differences. *Evol Med Public*  
1749 *Health.* 2019;2019: 26–34. doi:10.1093/emph/eoy036
- 1750 141. Gautier M, Vitalis R. rehh: an R package to detect footprints of selection in  
1751 genome-wide SNP data from haplotype structure. *Bioinforma Oxf Engl.* 2012;28:  
1752 1176–1177. doi:10.1093/bioinformatics/bts115
- 1753 142. Gautier M, Klassmann A, Vitalis R. rehh 2.0: a reimplementaion of the R package  
1754 rehh to detect positive selection from haplotype structure. *Mol Ecol Resour.*  
1755 2017;17: 78–90. doi:10.1111/1755-0998.12634
- 1756 143. R Core Team. R: A language and environment for statistical computing. Vienna,  
1757 Austria: R Foundation for Statistical Computing; Available: [http://www.R-](http://www.R-project.org/)  
1758 [project.org/](http://www.R-project.org/)
- 1759 144. Wickham H. ggplot2: Elegant Graphics for Data Analysis. New York: Springer-  
1760 Verlag; 2016.
- 1761 145. Wilke CO. cowplot: Streamlined Plot Theme and Plot Annotations for “ggplot2.”  
1762 2019. Available: <https://CRAN.R-project.org/package=cowplot>
- 1763 146. Dowle M, Srinivasan A. data.table: Extension of `data.frame`. 2019. Available:  
1764 <https://CRAN.R-project.org/package=data.table>
- 1765 147. Microsoft, Weston S. foreach: Provides Foreach Looping Construct for R. 2017.  
1766 Available: <https://CRAN.R-project.org/package=foreach>
- 1767 148. Revolution Analytics, Weston S. doMC: Foreach Parallel Adaptor for “parallel.”  
1768 2017. Available: Adaptor for 'parallel'. R package version 1.3.5. [https://CRAN.R-](https://CRAN.R-project.org/package=doMC)  
1769 [project.org/package=doMC](https://CRAN.R-project.org/package=doMC)
- 1770 149. Clarke E, Sherrill-Mix S. ggbeeswarm: Categorical Scatter (Violin Point) Plots.  
1771 2017. Available: <https://CRAN.R-project.org/package=ggbeeswarm>
- 1772 150. Golemund G, Wickham H. Dates and Times Made Easy with lubridate. *J Stat*  
1773 *Softw.* 2011;40: 1–25. doi:10.18637/jss.v040.i03
- 1774 151. Garnier S. viridis: Default Color Maps from “matplotlib.” 2018. Available:  
1775 <https://CRAN.R-project.org/package=viridis>
- 1776

1777 **Supporting Information**

1778

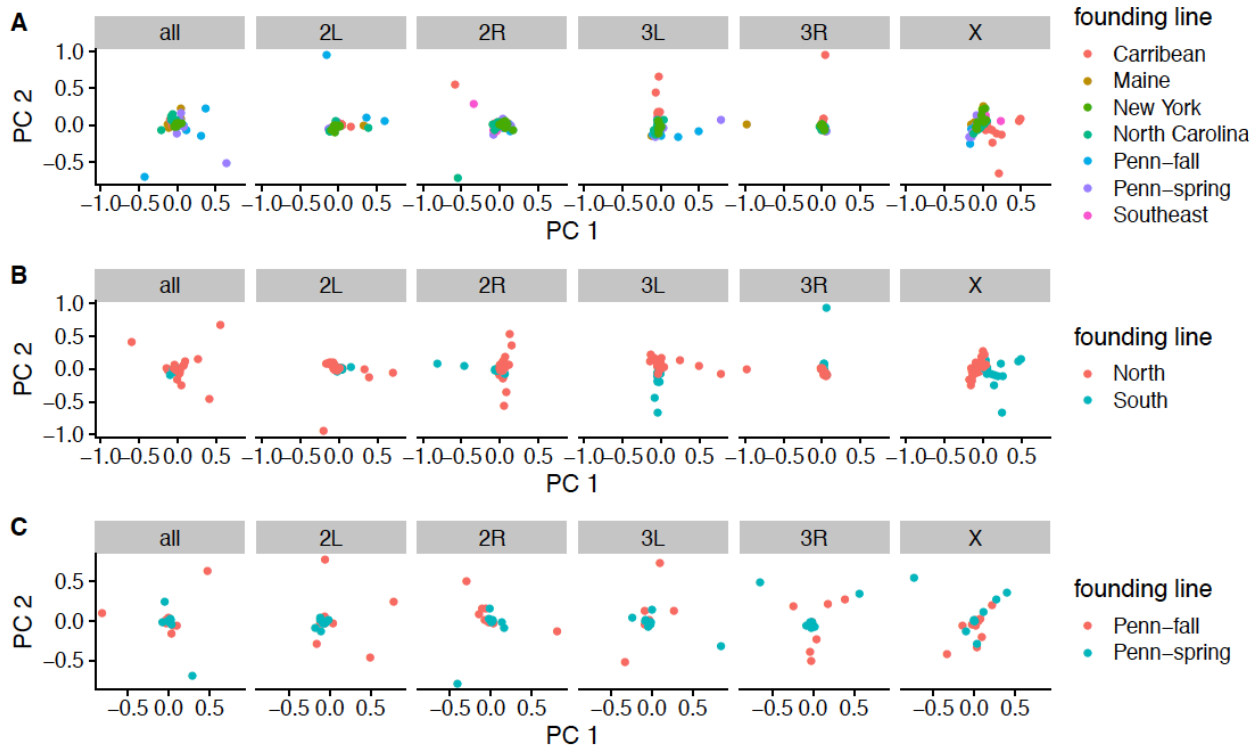

1779

1780

1781 **S1 Fig. Principal component analysis of genetic diversity of parental lines.**

1782 Principal components (PC) were calculated for (A) all parental lines, (B) northern and  
1783 southern lines (excluding the DGRP from North Carolina), and (C) lines with known  
1784 spring and fall collection dates. PCs were calculated genome-wide (all) or for each  
1785 chromosome arm separately.

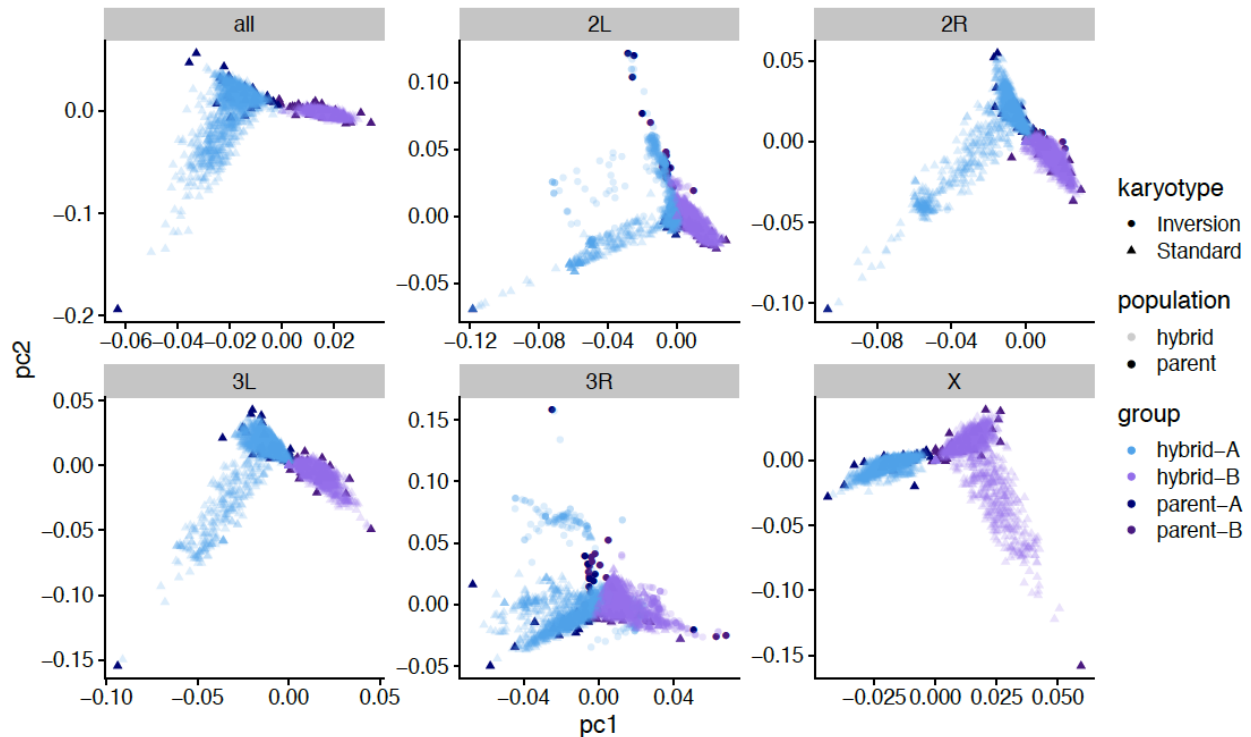

1786  
1787  
1788  
1789  
1790  
1791  
1792  
1793

**S2 Fig. Principal components analysis of hybrid swarm populations, including parental lines.** PC1 and PC2 are plotted for all chromosomes combined (all), as well as each individual chromosome arm, and are color coded by population. Dark shapes indicate parental lines, while transparent shapes indicate individual hybrids. Circles indicate an individual that is either heterozygous or homozygous for one of the cosmopolitan inversions on that chromosome.

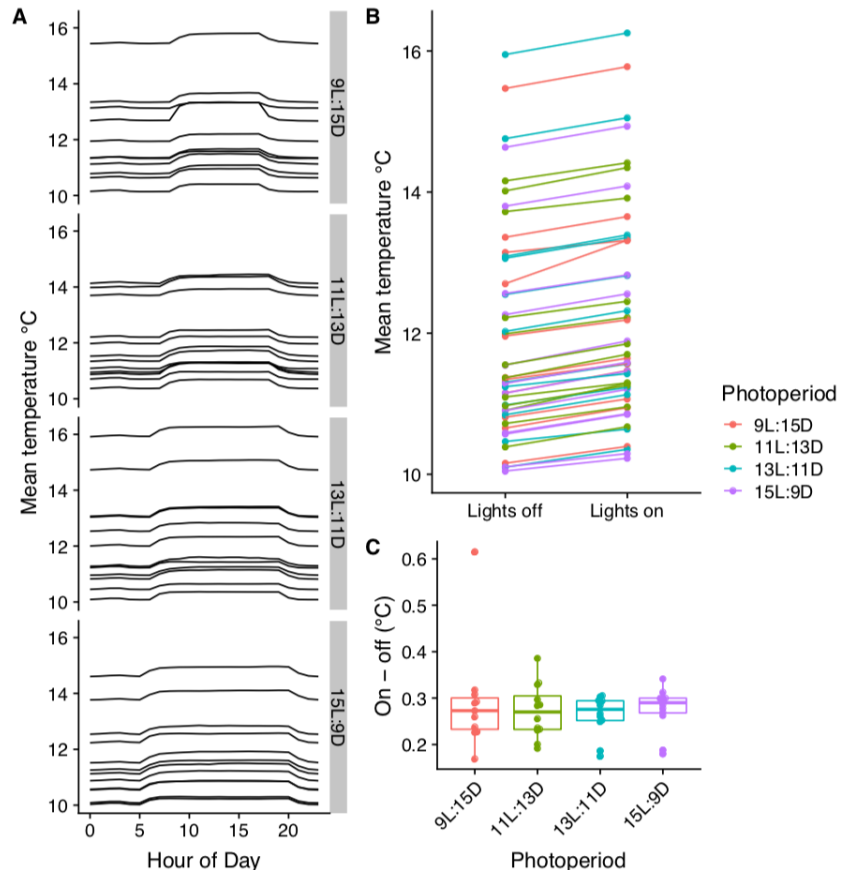

1794  
1795  
1796  
1797  
1798  
1799  
1800  
1801  
1802

**S3 Fig. Environmental control chambers maintain constant temperatures with little temperature change from lights.** (A) Average temperature of each box across a 24 hour day, separated by photoperiod into vertical facets. Each line represents the mean temperature of a single box recorded every 60 s for ~6 weeks. (B). Average temperature of each box when lights are off and lights are on, color coded by photoperiod. (C). Difference in average temperature when lights are on and lights are off. Each point represents one box.

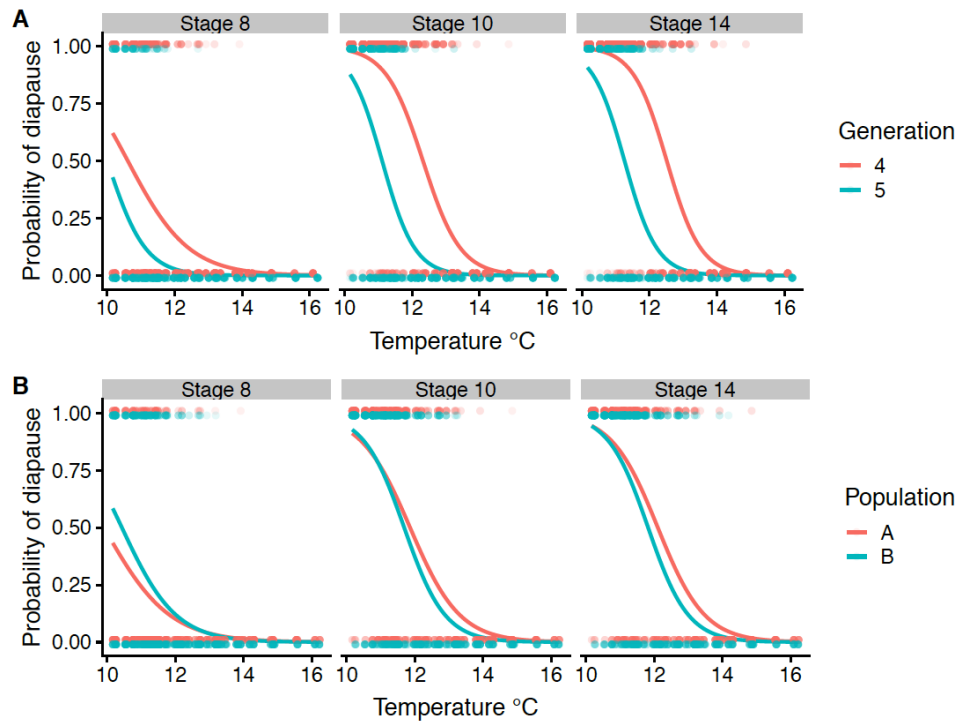

1803  
1804  
1805  
1806  
1807  
1808  
1809  
1810  
1811  
1812  
1813

**S4 Fig. Diapause phenotypes differ between generations and cages.** Grey points indicate individual phenotypes (1= diapause, 0 = non-diapause). Lines represent binomial models for each group. (A) F4s had uniformly higher diapause incidence than F5s, regardless of phenotype assessed (general linear model,  $P < 2 \times 10^{-16}$  for all). (B) The two hybrid swarms were also significantly different for all three diapause phenotypes. For stage 8, population B had generally higher diapause incidence, while cage A had higher incidence for stages 10 and 14 (general linear model,  $P = 0.0006$ ,  $P = 0.01$ ,  $P = 1.75 \times 10^{-5}$ , respectively).



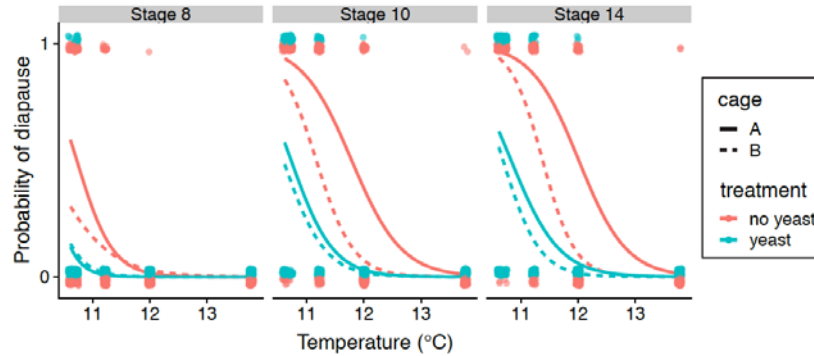

1814

1815

1816 **S5 Fig. Live yeast supplementation decreases diapause incidence across**

1817 **temperatures.** Advanced generation hybrid swarm individuals were exposed to

1818 diapause inducing conditions (9L:15D, 10-14°C) with or without a sprinkling of live

1819 baker's yeast on the surface of the food. Points represent individuals with jitter added

1820 for visual clarity (1= diapause, 0 = nondiapause); lines represent binomial models for

1821 each population and treatment. The presence of yeast decreased diapause at all

1822 thresholds scored (binomial general linear model,  $P < 2 \times 10^{-16}$  for all stages). There

1823 was a significant effect of population for all three phenotypes, with cage A showing

1824 higher diapause incidence than cage B, regardless of temperature or yeast treatment ( $P$

1825 = 0.03,  $P = 3.3 \times 10^{-6}$ ,  $P = 7.1 \times 10^{-7}$ ).

1826

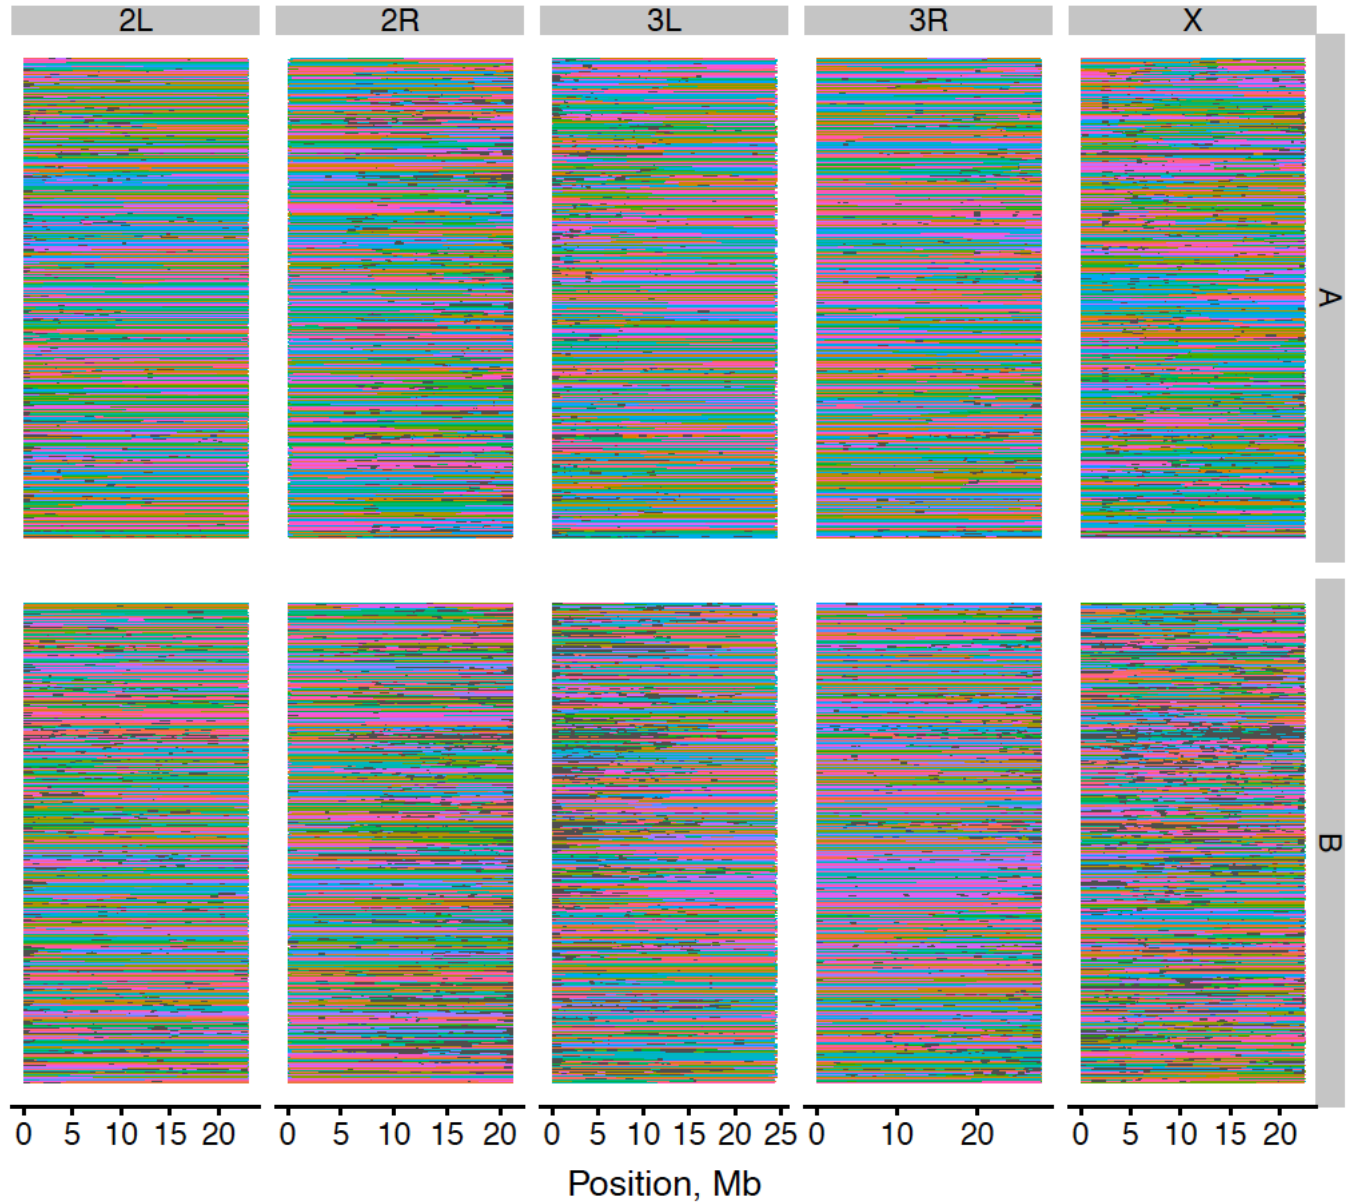

1827

1828

1829 **S6 Fig. Genome reconstructions for individual hybrids from populations A (top)**

1830 **and B (bottom).** Each horizontal line represents one haploid chromosome (n=2823

1831 diploid individuals total). Data are separated by chromosome arm (horizontal) and

1832 population (vertical). Grey indicates regions that were masked due to short inferred

1833 parental haplotypes (roughly 1.2% of sequences).

1834

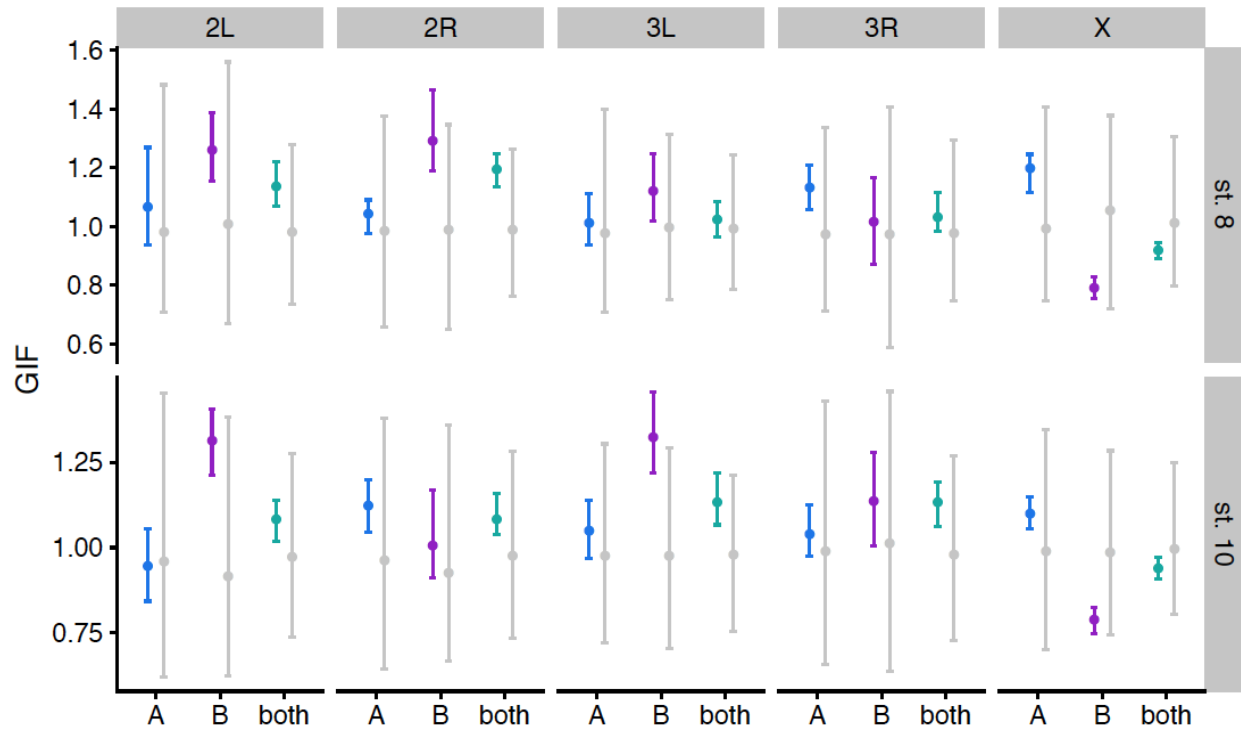

1835  
1836

1837

**S7 Fig.  $\lambda_{GC}$  is slightly inflated relative to permutations for autosomes, but not X.**

1838

The genomic inflation factor (GIF) was calculated for each chromosome separately in all  
1839 three mapping populations. Colors illustrate 100 imputations of the observed data; grey  
1840 indicates permutations (100 permutations for A and B, 1000 permutations for the  
1841 combined data). Points indicate the median, bars illustrate the 2.5%-97.5% quantiles.  
1842

1842

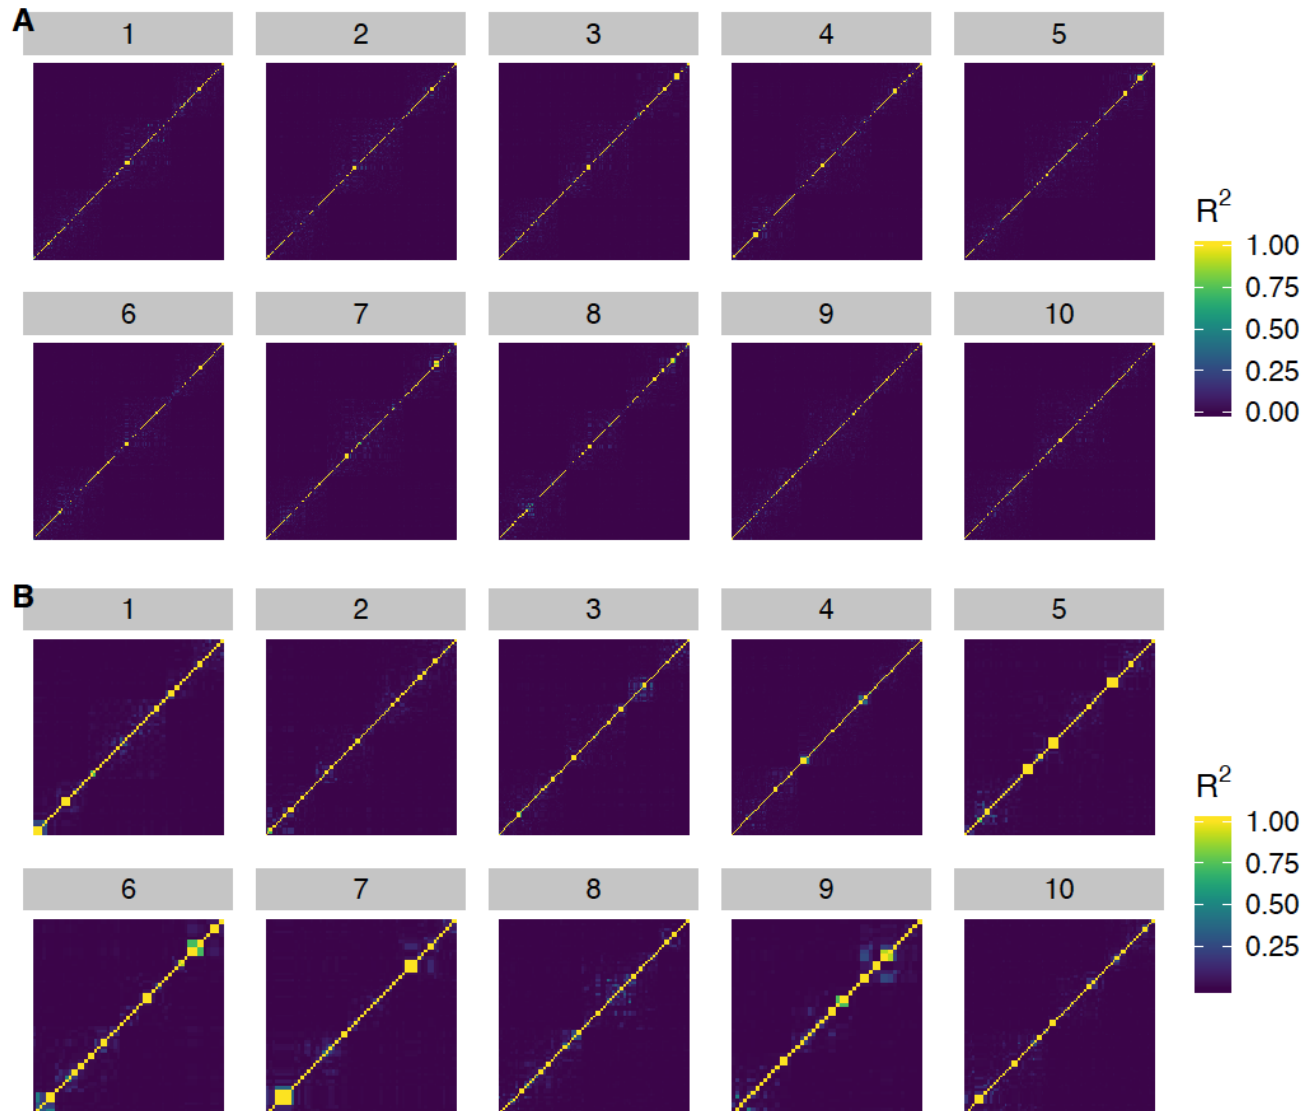

1843

1844

1845

1846

1847

1848

1849

**S8 Fig. LASSO SNPs are generally unlinked.** LD heatmaps showing  $R^2$  for LASSO SNPs from 10 imputations of the original ordering of the data (A) and 10 random permutations (B). LASSO SNPs for stage 10 diapause from the combined A+B mapping population were used to generate this figure.

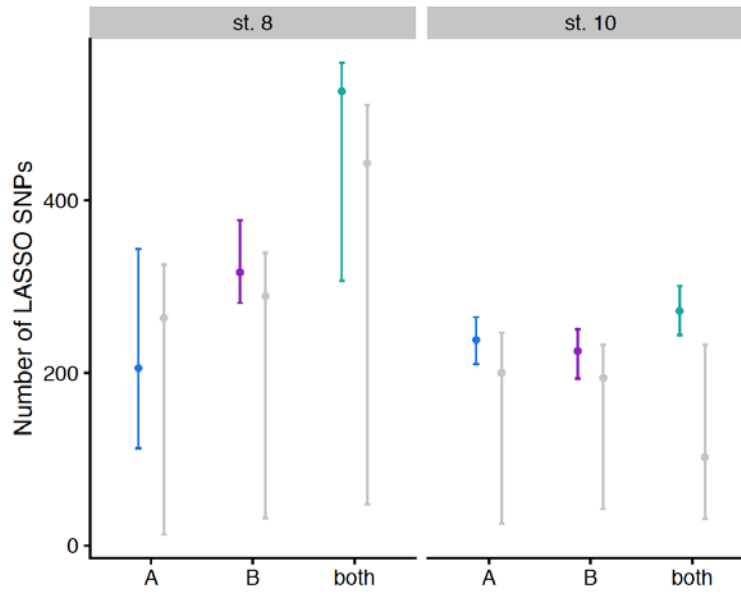

1850

1851

1852

1853

1854

1855

1856

1857

**S9 Fig. Number of SNPs chosen by LASSO is higher for actual data relative to permutations.** The number of LASSO SNPs was counted for each imputation or permutation of each phenotype in each mapping population. Points represent the median; bars extend to the 2.5% and 97.5% quantiles. Colors represent 100 imputations of the observed data; grey bars represent permutations (100 permutations for A and B, 1000 permutations for both).

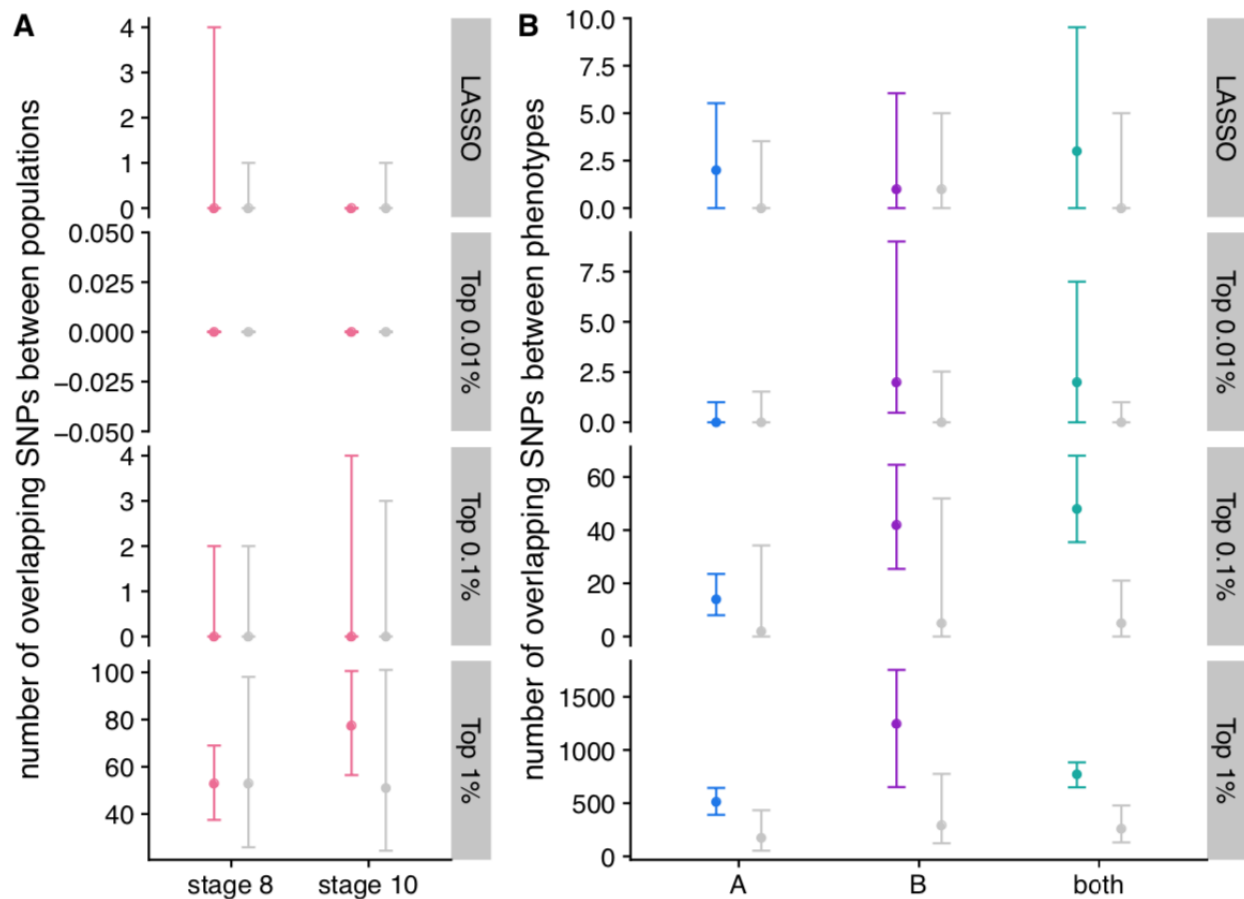

1858

1859

1860

1861

1862

1863

1864

1865

1866

1867

1868

**S10 Fig. Number of diapause-associated SNPs shared between mapping**

**populations and phenotypes.** (A). For each imputation and permutation, the number of SNPs shared between populations A and B was counted for various sets of GWAS SNPs. Pink indicates 100 imputations of the actual data, grey indicates 100 permutations. Points represent the median and error bars extend to the 2.5% and 97.5% quantiles. (B) For each imputation and permutation, the number of SNPs shared between stage 8 and stage 10 diapause was counted. Grey points represent 100 permutations of populations A and B; 1000 permutations of both populations combined. Colored points represent 100 imputations of the actual data.

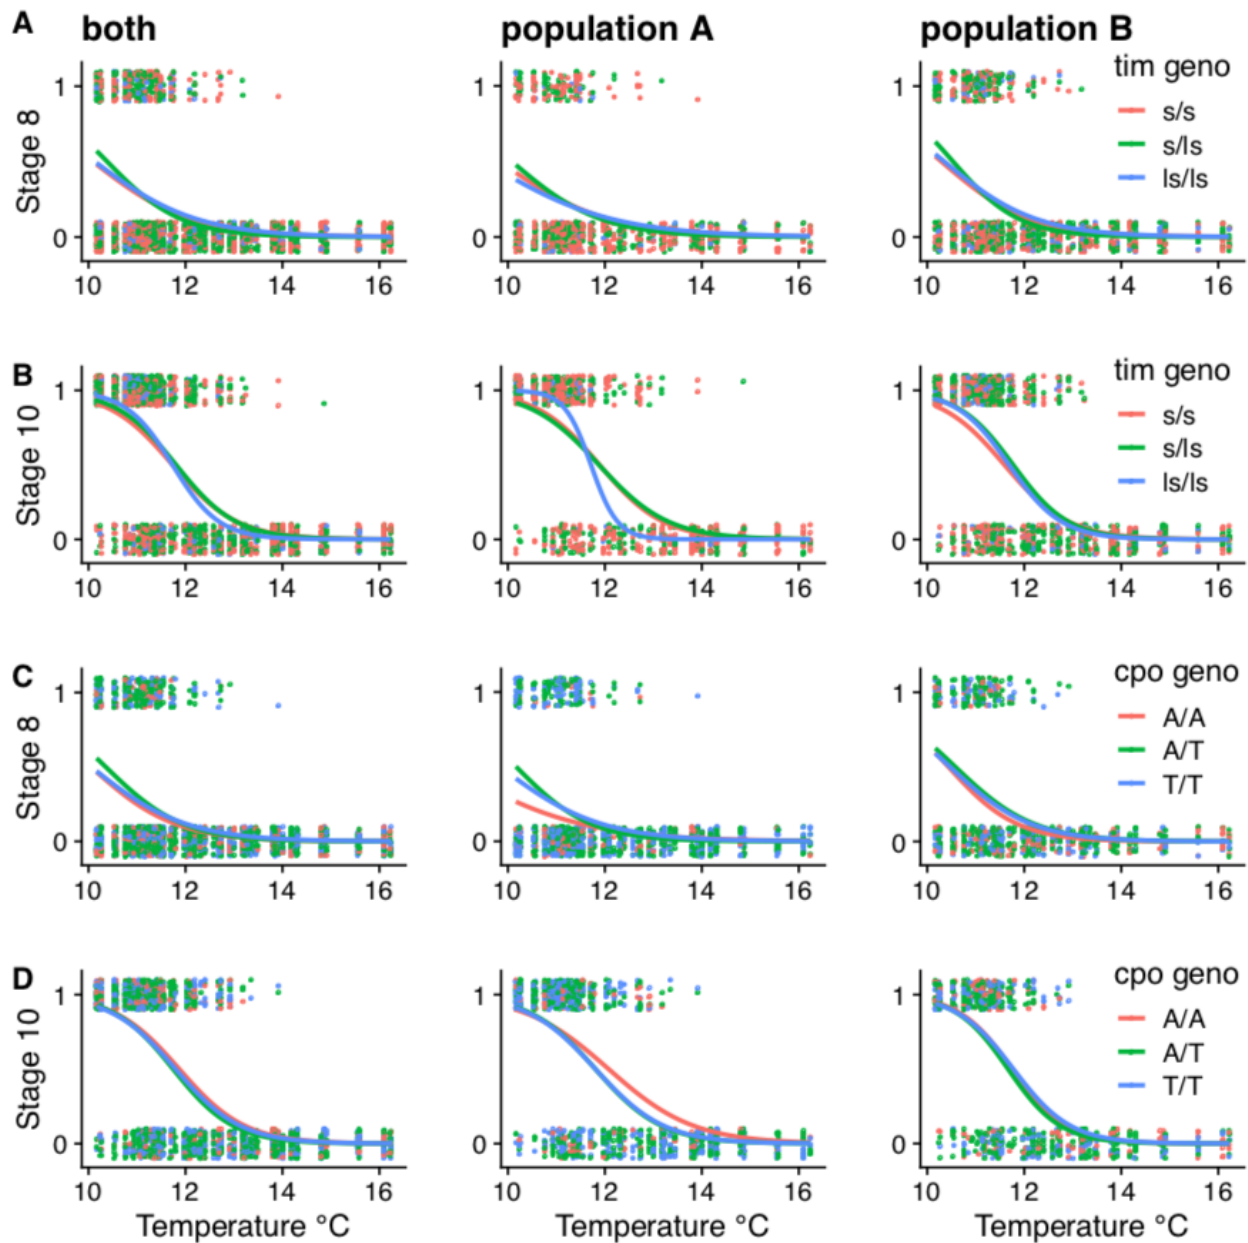

1869

1870

1871

1872

1873

1874

1875

1876

1877

1878

**S11 Fig. Previously identified diapause-associated variants have no effect in this study.** (A-B). A 1 bp indel that creates an alternate translation start site in *timeless* (*tim*) does not affect diapause in the full dataset or either individual population after correcting for temperature for diapause at stage 8 (A) or stage 10 (B). (C-D) An intronic SNP in *couch potato* (*cpo*) also has no effect in the full dataset or either individual population after correcting for temperature for diapause at stage 8 (C) or stage 10 (D). General linear model *P*-values for genotype are greater than 0.05 for all models, except for *tim* in population B, stage 8 ( $P = 0.0189$ ).

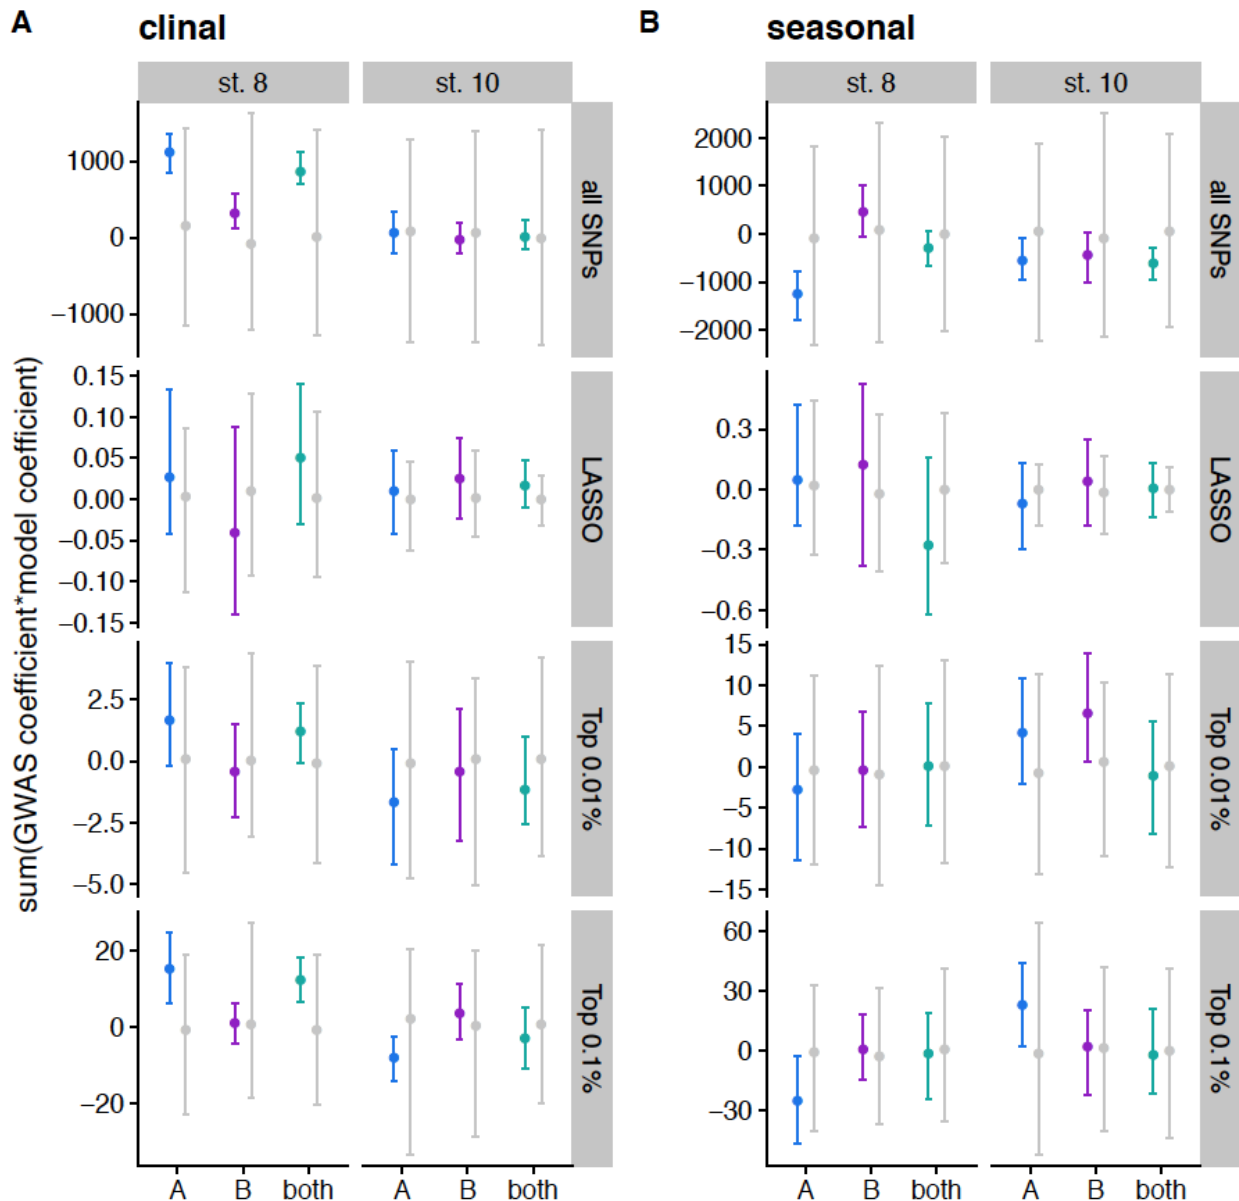

1879  
1880

1881 **S12 Fig. Polygenic score test for data from Machado *et al*, 2019.** A) Polygenic  
1882 scores calculated by multiplying clinal effect size and GWAS effect sizes for each SNP  
1883 and summing across all SNPs, LASSO SNPs, the top 0.01% of the GWAS, and the top  
1884 0.1% of the GWAS. Effect sizes are polarized such that positive numbers indicated pro-  
1885 diapause alleles are more common in the north. Data are shown with a point for the  
1886 mean and error bars extending to the 2.5% and 97.5% quantiles. Colored points  
1887 indicate actual data for 100 imputations of each mapping population; grey points  
1888 indicate the distribution for permutations. B) Polygenic scores calculated for seasonal  
1889 data by multiplying seasonal betas and GWAS effect sizes, polarized so that pro-  
1890 diapause and spring are positive.



1891

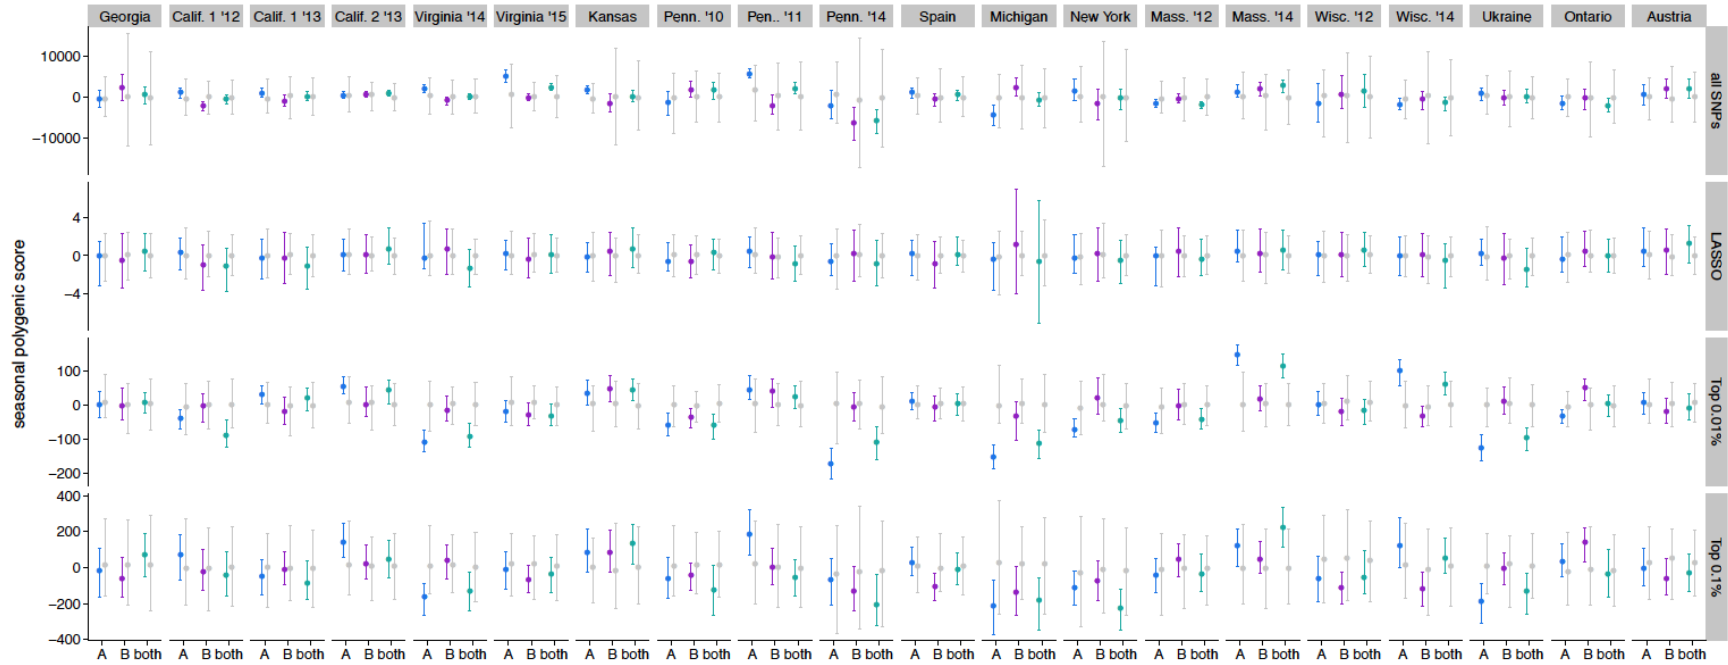

1892

1893

1894

1895

1896

1897

1898

**S13 Fig. Individual population polygenic score test for stage 8 diapause in populations collected by Machado *et al* (2019).** The GWAS or LASSO effect size was multiplied by the logit-transformed change in allele frequency from spring to fall in 20 populations. These products were then summed across all SNPs of interest for each mapping population. Populations are ordered by increasing latitude and year. Points represent median, error bars represent 2.5% and 97.5% quantiles. Grey points/bars are permutations; colors represent 100 imputations of the observed data.

1899

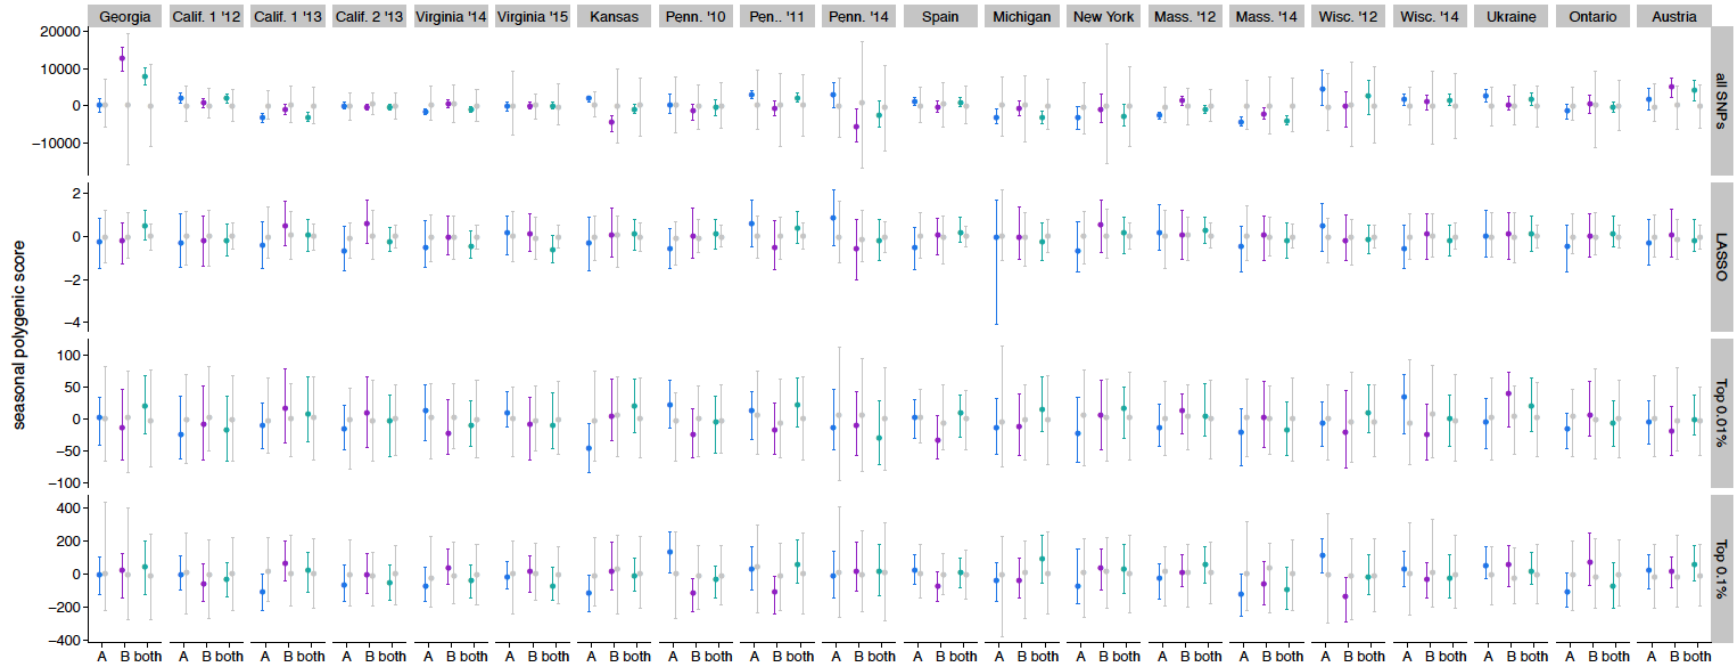

1900  
1901  
1902  
1903  
1904  
1905  
1906

**S14 Fig. Individual population polygenic score test for stage 10 diapause in populations collected by Machado et al (2019).** The GWAS or LASSO effect size was multiplied by the logit-transformed change in allele frequency from spring to fall in 20 populations. These products were then summed across all SNPs of interest for each mapping population. Populations are ordered by increasing latitude and year. Points represent median, error bars represent 2.5% and 97.5% quantiles. Grey points/bars are permutations; colors represent 100 imputations of the observed data.

1907

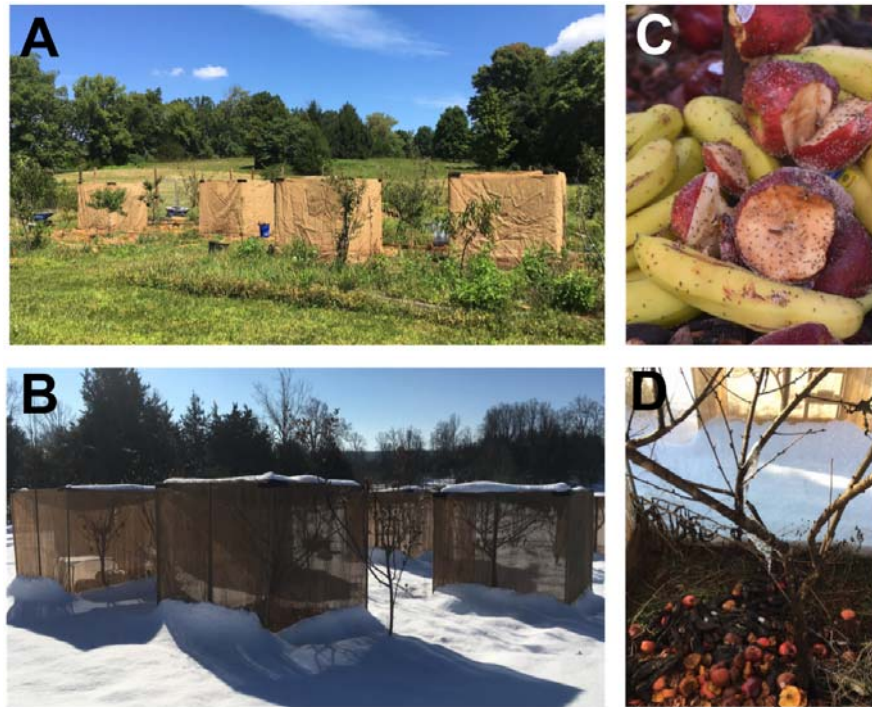

1908

1909

1910

**S15 Fig. Field cages used to study diapause evolution under natural conditions.**

1911 Summer (A) and winter (B) views of the experimental orchard with peach trees enclosed

1912 in mesh cages. (C) Flies feeding on yeasted fruit. (D) Winter view of compost pile in

1913 more advanced stage of decomposition. Photos in B and D were taken on December

1914 10<sup>th</sup>, 2018, the final collection point in Fig 6. Surviving *D. melanogaster* were recovered

1915 from the cages on this day, despite heavy snow and several days of sub-freezing

1916 temperatures.

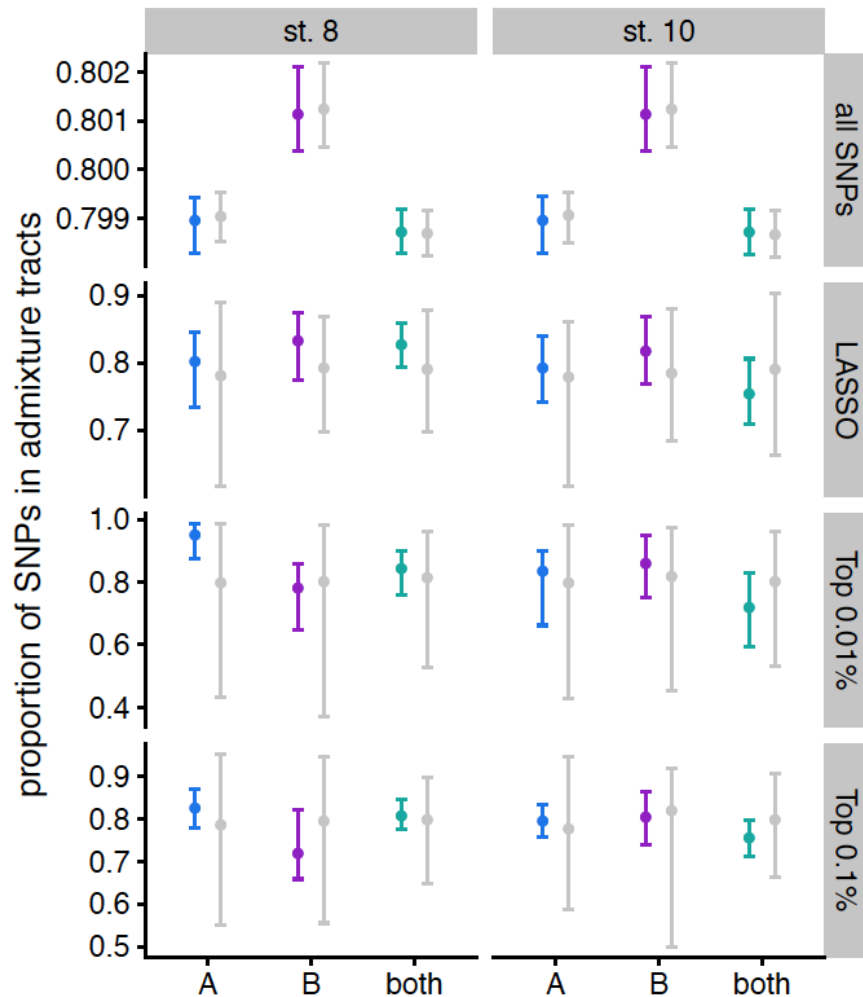

1917

1918

1919

1920

1921

1922

1923

1924

**S16 Fig. GWAS SNPs are not enriched in tracts of admixture between European and Zambian flies.** Each set of SNPs was intersected with the admixture tracts of European/Zambian admixture, and the proportion of SNPs found within at least one admixture tract was calculated for each mapping population. Points represent median, error bars represent 2.5% and 97.5% quantiles. Grey points/bars are permutations; colors represent 100 imputations of the observed data.

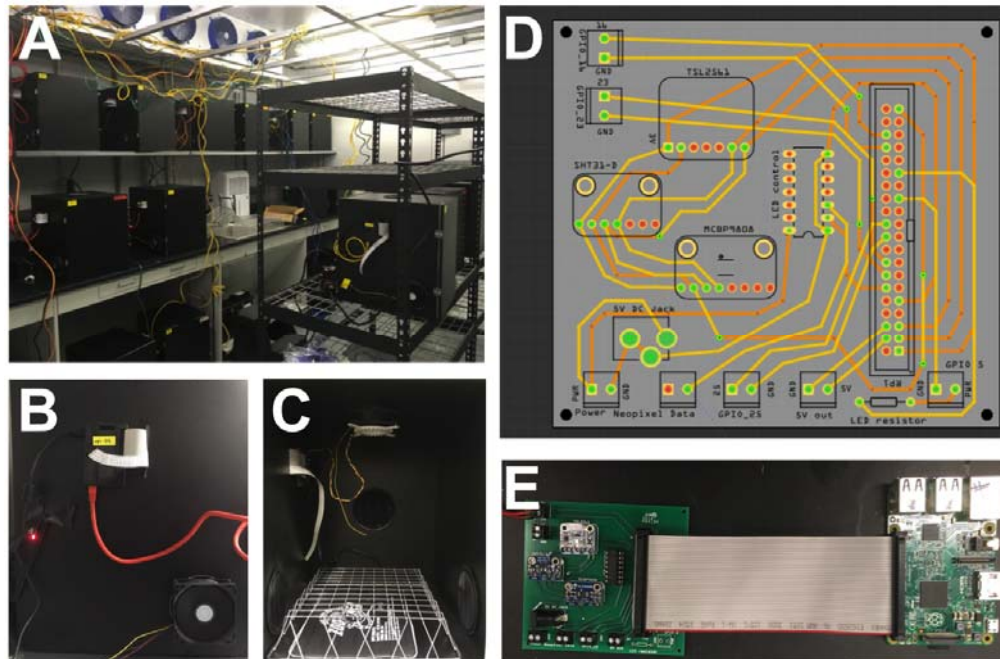

1925  
1926  
1927  
1928  
1929  
1930  
1931  
1932

**S17 Fig. Photoperiod chambers.** A) Array of chambers in cold room. B) Side view illustrating fan and externally mounted Raspberry Pi with ethernet connection. C) Interior view illustrating heating element (bottom), light-proof vents (sides), LED lights (top) and circuit board (top left). D) Fritzing layout for custom printed circuit board (PCB). File available upon request. E) Circuit board connected to Raspberry Pi computer via 40 pin ribbon cable.

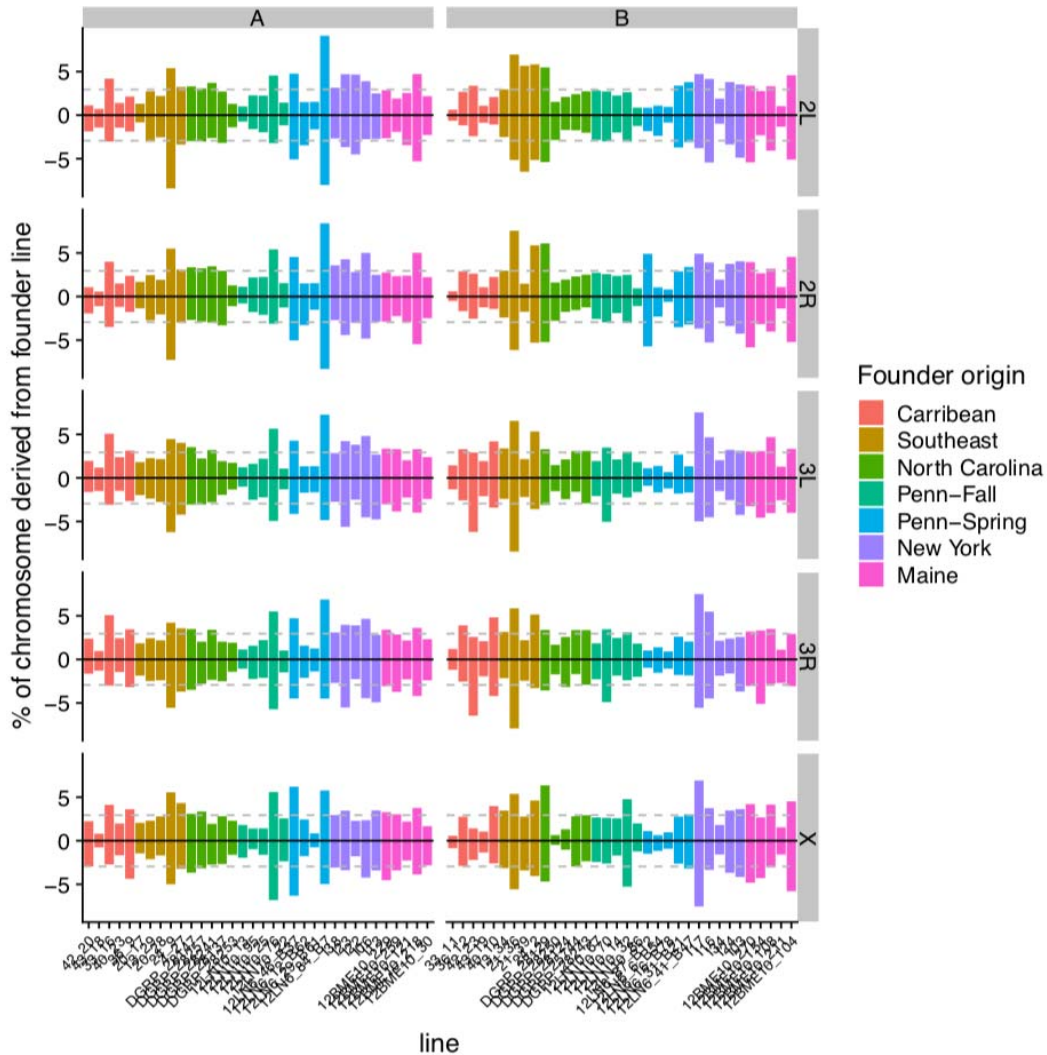

1933

1934

1935

1936

1937

1938

1939

1940

**S18 Fig. All founding lines are represented in F4 and F5 hybrid swarms.** The percent contribution of each founding line in each chromosome arm was calculated for swarm A (left) and B (right). F4s are shown with positive values, and F5s are mirrored with negative values below. Color coding corresponds to geographical origin of the lines. Dashed grey lines indicate the expected contribution of each line ( $1/34 = 2.9\%$ ) under perfectly even admixture.

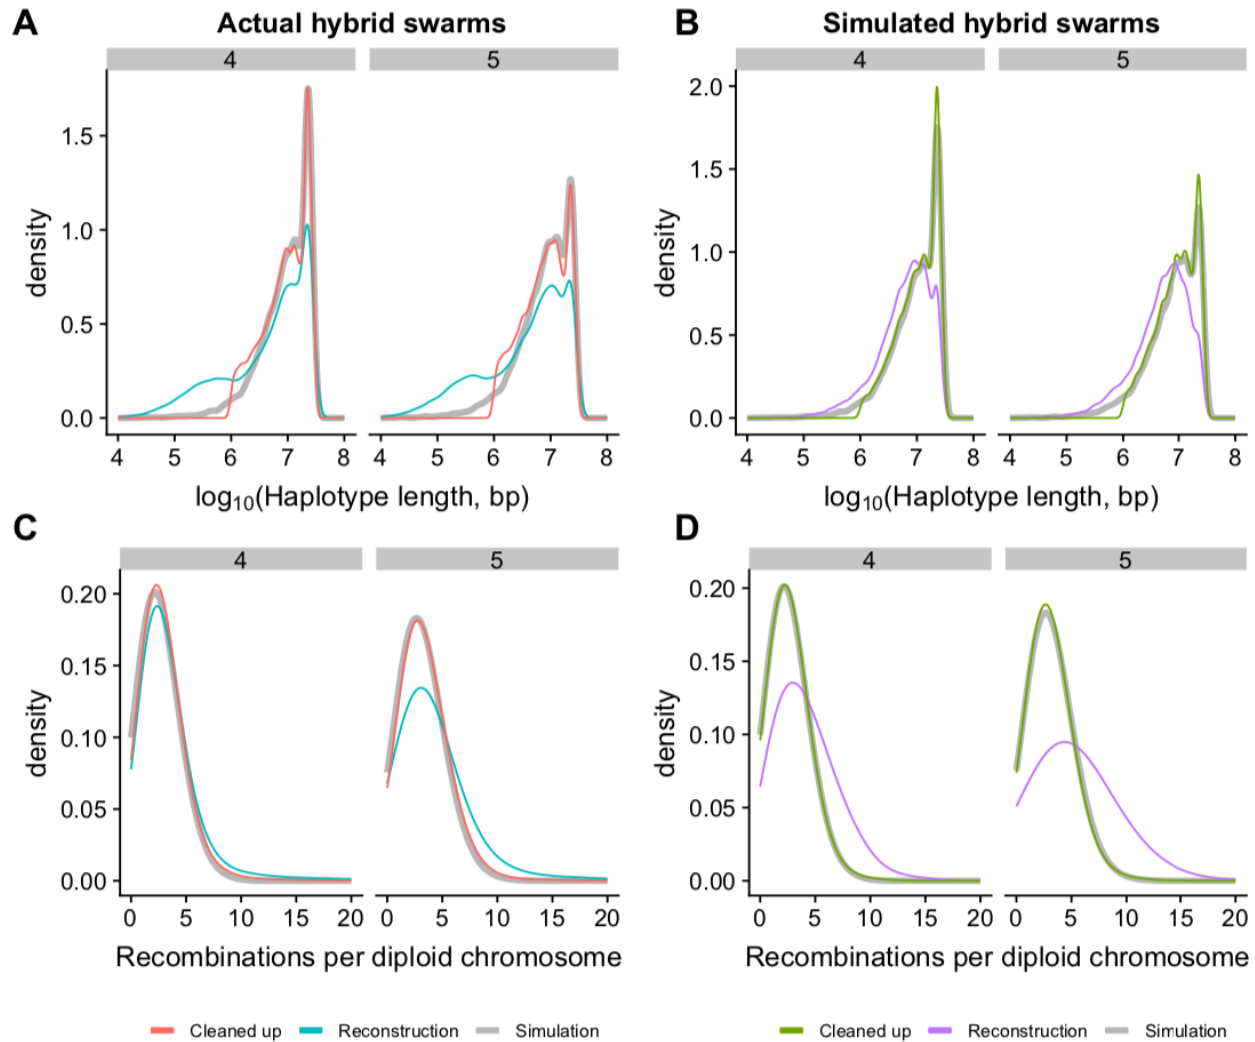

1941  
1942

1943 **S19 Fig. Haplotype size and recombination distributions for reconstructed F4 and**  
 1944 **F5 genomes.** (A-B) The initial genome reconstruction of sequencing data (blue, A)  
 1945 shows an excess of short (~10,000-1,000,000 bp) haplotypes relative to simulated F4  
 1946 and F5 populations (grey bold line). This excess also occurs in reconstructions of  
 1947 simulated hybrid swarm reads (B, purple). Cleaning up the reconstruction data by  
 1948 combining adjacent short (< 1 Mb) haplotypes into unknown haplotypes and dropping  
 1949 singleton short haplotypes results in a distribution of haplotype sizes that more closely  
 1950 match the simulations for both empirical data (red, A) and simulated data (green, B). (C-  
 1951 D) Raw reconstructions have an excess of recombination events (blue and purple)  
 1952 relative to simulated data (grey). The cleanup procedure results in recombination  
 1953 numbers on par with the simulated data (red and green).

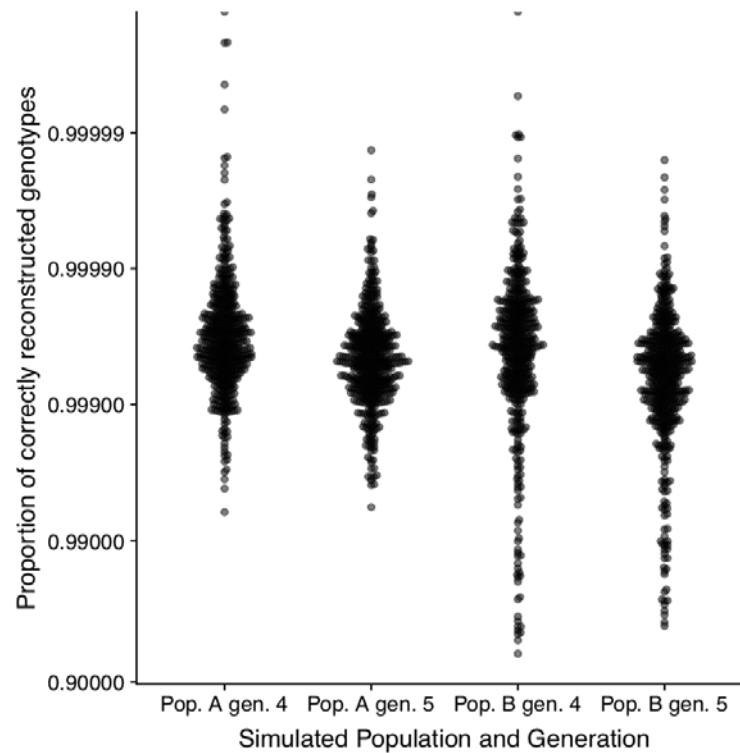

1954  
1955

1956 **S20 Fig. Accuracy of simulated genome reconstructions.** Hybrid F4 and F5  
1957 individuals were simulated from the founding lines for populations A and B using a  
1958 custom script, and 0.5X coverage sequencing reads were generated with *wgsim*. These  
1959 simulated reads were passed through the genome reconstruction pipeline, and the  
1960 reconstructed genotypes were compared to the original simulated individual. Accuracy  
1961 was determined as the proportion of all sites with an exact match between the  
1962 reconstructed genotype and actual genotype. The vast majority of individuals have an  
1963 accuracy of >99%, though accuracy is higher in population A than population B. Note  
1964 logarithmic scale of y-axis.



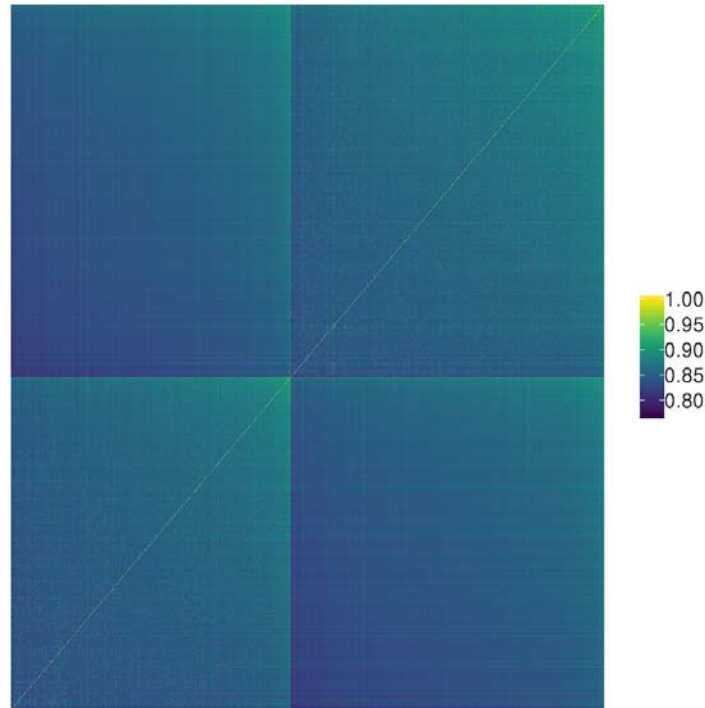

1965

1966

1967

1968

1969

1970

1971

1972

1973

1974

1975

1976

1977

1978

**S21 Fig. Identity-by-state genetic relatedness matrix for all hybrid swarm individuals.** Individuals are ordered by population (A on left, B on right) and sorted by identity by state. IBS was calculated using an LD-pruned set of ~63,000 SNPs with allele frequencies > 0.05. Individuals are generally more closely related to other individuals in the same population.

**S1 Table. SRA and collection information for previously sequenced parental lines.**  
(Excel file)

1979 **S2 Table. Variance decomposition for variables influencing diapause.**

1980

|                         | Stage 8 |       |           |              | Stage 10 |        |           |              |
|-------------------------|---------|-------|-----------|--------------|----------|--------|-----------|--------------|
|                         | Sum Sq  | F     | P         | PVE          | Sum Sq   | F      | P         | PVE          |
| temperature             | 504.4   | 651.1 | 2.37E-129 | <b>17.67</b> | 1558.9   | 1676.2 | 8.55E-288 | <b>33.84</b> |
| photoperiod             | 1.8     | 2.3   | 0.127     | <b>0.06</b>  | 16.0     | 17.2   | 3.50E-05  | <b>0.35</b>  |
| generation              | 141.8   | 183.1 | 1.86E-40  | <b>4.97</b>  | 416.0    | 447.3  | 3.04E-92  | <b>9.03</b>  |
| population              | 17.8    | 23.0  | 1.75E-06  | <b>0.62</b>  | 0.8      | 0.9    | 0.34      | <b>0.02</b>  |
| Wolbachia               | 8.2     | 10.5  | 0.0011    | <b>0.29</b>  | 0.4      | 0.5    | 0.49      | <b>0.01</b>  |
| temperature*photoperiod | 3.6     | 4.7   | 0.03      | <b>0.13</b>  | 0.7      | 0.7    | 0.39      | <b>0.01</b>  |
| residuals               | 2177.8  | -     | -         | <b>76.27</b> | 2613.3   | -      | -         | <b>56.74</b> |

1981

1982

1983 **S3 Table. P-values from general linear model of the effects of cosmopolitan inversions on diapause in each population**

1984

|   | chr | inversion | both         |              | A            |              | B       |          |
|---|-----|-----------|--------------|--------------|--------------|--------------|---------|----------|
|   |     |           | stage 8      | stage 10     | stage 8      | stage 10     | stage 8 | stage 10 |
| 1 | 3R  | Mo        | 0.730        | 0.454        | 0.653        | 0.335        | 0.603   | 0.618    |
| 2 | 3R  | C         | 0.301        | 0.162        | 0.289        | 0.185        | NA      | NA       |
| 3 | 3R  | Payne     | <b>0.029</b> | <b>0.013</b> | <b>0.004</b> | <b>0.005</b> | 0.596   | 0.824    |
| 4 | 2L  | t         | 0.773        | 0.085        | 0.912        | 0.071        | 0.981   | 0.982    |
| 5 | 2R  | Ns        | 0.971        | 0.975        | 0.981        | 0.983        | NA      | NA       |

1985

1986 *Note: Bold text indicates  $P < 0.05$ ; no inversions pass Bonferroni correction.*

| Annotation          | Population | phenotype | Top 1% | Top 0.1% | Top 0.01% | LASSO |
|---------------------|------------|-----------|--------|----------|-----------|-------|
| UTR                 | A          | stage 8   | 6.2%   | 6.4%     | 9.0%      | 6.4%  |
|                     | A          | stage 10  | 6.4%   | 6.3%     | 3.8%      | 7.6%  |
|                     | B          | stage 8   | 6.6%   | 7.7%     | 10.2%     | 5.6%  |
|                     | B          | stage 10  | 6.2%   | 5.0%     | 2.5%      | 5.3%  |
|                     | both       | stage 8   | 6.4%   | 6.7%     | 10.6%     | 5.9%  |
|                     | both       | stage 10  | 6.3%   | 5.0%     | 4.0%      | 4.5%  |
| intergenic          | A          | stage 8   | 11.2%  | 11.8%    | 3.8%      | 10.9% |
|                     | A          | stage 10  | 10.4%  | 11.0%    | 13.9%     | 10.1% |
|                     | B          | stage 8   | 10.9%  | 8.5%     | 11.5%     | 10.3% |
|                     | B          | stage 10  | 11.2%  | 9.4%     | 5.2%      | 9.5%  |
|                     | both       | stage 8   | 9.7%   | 7.9%     | 4.0%      | 9.7%  |
|                     | both       | stage 10  | 10.6%  | 8.1%     | 2.7%      | 7.1%  |
| intronic            | A          | stage 8   | 25.4%  | 23.8%    | 12.8%     | 23.4% |
|                     | A          | stage 10  | 24.7%  | 24.4%    | 32.1%     | 23.6% |
|                     | B          | stage 8   | 24.0%  | 23.6%    | 24.7%     | 24.0% |
|                     | B          | stage 10  | 27.0%  | 31.6%    | 36.2%     | 23.5% |
|                     | both       | stage 8   | 25.0%  | 24.9%    | 17.3%     | 27.1% |
|                     | both       | stage 10  | 25.6%  | 30.0%    | 38.7%     | 32.6% |
| non-synonymous      | A          | stage 8   | 4.4%   | 3.7%     | 0.0%      | 3.2%  |
|                     | A          | stage 10  | 4.2%   | 3.6%     | 1.3%      | 3.1%  |
|                     | B          | stage 8   | 4.4%   | 4.1%     | 5.2%      | 3.2%  |
|                     | B          | stage 10  | 3.8%   | 3.0%     | 3.9%      | 4.1%  |
|                     | both       | stage 8   | 3.9%   | 3.7%     | 3.3%      | 3.2%  |
|                     | both       | stage 10  | 3.8%   | 3.5%     | 2.7%      | 2.9%  |
| synonymous          | A          | stage 8   | 11.0%  | 10.7%    | 11.4%     | 13.0% |
|                     | A          | stage 10  | 11.4%  | 11.6%    | 7.8%      | 13.1% |
|                     | B          | stage 8   | 9.8%   | 10.5%    | 6.6%      | 12.2% |
|                     | B          | stage 10  | 8.5%   | 7.4%     | 7.8%      | 10.6% |
|                     | both       | stage 8   | 10.6%  | 10.0%    | 8.0%      | 10.8% |
|                     | both       | stage 10  | 10.3%  | 9.0%     | 5.3%      | 10.4% |
| upstream/downstream | A          | stage 8   | 41.6%  | 43.1%    | 60.8%     | 41.8% |
|                     | A          | stage 10  | 42.6%  | 43.2%    | 39.7%     | 42.7% |
|                     | B          | stage 8   | 44.2%  | 45.2%    | 42.1%     | 44.3% |
|                     | B          | stage 10  | 43.0%  | 43.5%    | 44.2%     | 46.8% |
|                     | both       | stage 8   | 44.1%  | 46.8%    | 56.0%     | 42.7% |
|                     | both       | stage 10  | 43.2%  | 44.1%    | 44.7%     | 41.8% |

1987  
1988  
1989  
1990  
1991  
1992

**S4 Table: Functional annotations in diapause-associated SNPs.** For each class of variant, the percentage of diapause-associated SNPs assigned to that variant type was quantified. The percentage reported is the median of 100 imputations.

| Annotation          | Population | phenotype | Top 1%       | Top 0.1%     | Top 0.01%    | LASSO |
|---------------------|------------|-----------|--------------|--------------|--------------|-------|
| UTR                 | A          | stage 8   | 0.43         | 0.58         | 0.82         | 0.67  |
|                     | A          | stage 10  | 0.77         | 0.61         | 0.27         | 0.82  |
|                     | B          | stage 8   | 0.86         | 0.9          | 0.86         | 0.51  |
|                     | B          | stage 10  | 0.56         | 0.2          | 0.09         | 0.44  |
|                     | both       | stage 8   | 0.736        | 0.677        | 0.875        | 0.487 |
|                     | both       | stage 10  | 0.676        | 0.179        | 0.362        | 0.301 |
| intergenic          | A          | stage 8   | 0.64         | 0.71         | 0.12         | 0.55  |
|                     | A          | stage 10  | 0.43         | 0.62         | 0.79         | 0.43  |
|                     | B          | stage 8   | 0.58         | 0.11         | 0.53         | 0.45  |
|                     | B          | stage 10  | 0.61         | 0.27         | 0.19         | 0.35  |
|                     | both       | stage 8   | 0.124        | 0.109        | 0.129        | 0.321 |
|                     | both       | stage 10  | 0.448        | 0.118        | 0.073        | 0.144 |
| intronic            | A          | stage 8   | 0.76         | 0.46         | 0.08         | 0.41  |
|                     | A          | stage 10  | 0.44         | 0.41         | 0.84         | 0.35  |
|                     | B          | stage 8   | 0.31         | 0.32         | 0.59         | 0.32  |
|                     | B          | stage 10  | <b>0.97</b>  | 0.94         | 0.95         | 0.37  |
|                     | both       | stage 8   | 0.653        | 0.552        | 0.214        | 0.742 |
|                     | both       | stage 10  | 0.816        | <b>0.963</b> | 0.95         | 0.917 |
| non-synonymous      | A          | stage 8   | 0.8          | 0.42         | 0.1          | 0.44  |
|                     | A          | stage 10  | 0.62         | 0.3          | 0.18         | 0.44  |
|                     | B          | stage 8   | 0.8          | 0.6          | 0.78         | 0.37  |
|                     | B          | stage 10  | 0.27         | 0.2          | 0.63         | 0.57  |
|                     | both       | stage 8   | 0.371        | 0.412        | 0.443        | 0.356 |
|                     | both       | stage 10  | 0.301        | 0.312        | 0.456        | 0.371 |
| synonymous          | A          | stage 8   | 0.32         | 0.28         | 0.42         | 0.54  |
|                     | A          | stage 10  | 0.55         | 0.56         | 0.32         | 0.61  |
|                     | B          | stage 8   | <b>0.01</b>  | 0.35         | 0.15         | 0.67  |
|                     | B          | stage 10  | <b>0.01</b>  | <b>0.03</b>  | 0.27         | 0.39  |
|                     | both       | stage 8   | 0.085        | 0.176        | 0.272        | 0.36  |
|                     | both       | stage 10  | <b>0.031</b> | 0.067        | 0.107        | 0.365 |
| upstream/downstream | A          | stage 8   | 0.14         | 0.54         | <b>0.97</b>  | 0.48  |
|                     | A          | stage 10  | 0.51         | 0.57         | 0.35         | 0.61  |
|                     | B          | stage 8   | 0.89         | 0.83         | 0.46         | 0.61  |
|                     | B          | stage 10  | 0.52         | 0.64         | 0.55         | 0.84  |
|                     | both       | stage 8   | 0.872        | 0.914        | <b>0.952</b> | 0.547 |
|                     | both       | stage 10  | 0.661        | 0.671        | 0.609        | 0.482 |

1993  
1994  
1995  
1996  
1997  
1998  
1999  
2000

**S5 Table: Enrichment of functional annotations in diapause-associated SNPs.** For each class of variant, the proportion of diapause-associated SNPs assigned to that variant type was quantified for each imputation and permutation. The numerical values are the quantile rank of the median of the 100 observed imputations relative to the distribution of the permutations. Quantile ranks below 5% and above 95% (i.e. those values that are de-enriched or enriched relative to permutations) are highlighted in bold.

2001 **S6 Table. List of LASSO SNPs, top 0.01% SNPs, and top 0.1% SNPs along with**  
2002 **annotations. (*Excel file*)**
